# Supplementary material for: Solvent- and catalyst-dependent palladium-catalyzed switchable chemodivergent cascade cyclizations of trimethylenemethanes with ortho-formyl cinnamates
Source: Royal Society of Chemistry journal article supplement (doi:10.1039/d3qo01525d), 2023-11-30
Supplement: d3qo01525d1.pdf [file d3qo01525d1.pdf]

*Supporting Information*

**Solvent and Catalyst Dependent Palladium-Catalyzed Switchable  
Chemodivergent Cascade Cyclizations of Trimethylenemethanes  
with *ortho*-Formyl Cinnamates**

Shuyuan Liang<sup>a</sup>, Liangjian Tang<sup>a</sup>, Ying Chen<sup>a</sup>, Xueqiu Huang<sup>a,\*</sup>, Xueqin Wei<sup>a,\*</sup>

<sup>a</sup> School of Pharmacy, Guangxi Medical University, Nanning, 530021, China

---

## Table of Contents

|                                                                               |    |
|-------------------------------------------------------------------------------|----|
| <b>1. General methods</b> .....                                               | 3  |
| <b>2. Detailed condition screenings</b> .....                                 | 4  |
| <b>2.1 Detailed condition screenings for the synthesis of 3a and 4a</b> ..... | 4  |
| <b>2.2 Detailed condition screenings for the synthesis of 6a</b> .....        | 6  |
| <b>3. General procedure for the synthesis of cycloadducts 3a–m</b> .....      | 7  |
| <b>4. General procedure for the synthesis of cycloadducts 4a–f</b> .....      | 14 |
| <b>5. General procedure for synthesis of cycloadducts 6a–f</b> .....          | 18 |
| <b>6. Synthesis of cycloadducts 3f on a 1.0 mmol scale</b> .....              | 22 |
| <b>7. Synthesis of cycloadducts 4f on a 1.0 mmol scale</b> .....              | 22 |
| <b>8. More substrate attempts</b> .....                                       | 23 |
| <b>9. Asymmetric explorations</b> .....                                       | 26 |
| <b>10. Crystal data and structural refinement</b> .....                       | 27 |
| <b>11. Mechanism study</b> .....                                              | 29 |
| <b>11.1 C=O- and C=C-selectivity [3+2] cycloaddition in DME</b> .....         | 29 |
| <b>11.2 NBO charge analysis of the substrates and intermediates</b> .....     | 30 |
| <b>11.3 <sup>1</sup>H NMR mechanistic experiments</b> .....                   | 33 |
| <b>12. References</b> .....                                                   | 36 |
| <b>13. NMR and HRMS spectra</b> .....                                         | 37 |
| <b>14. Computational data</b> .....                                           | 88 |

---

## 1. General methods

<sup>1</sup>H NMR (600 MHz), <sup>13</sup>C NMR (150 MHz) spectra were recorded on Bruker Avance NEO 600 MHz. Chemical shifts were reported in ppm from tetramethylsilane with the solvent resonance as the internal standard in CDCl<sub>3</sub> solution. The following abbreviations were used to explain the multiplicities: s = singlet, d = doublet, t = triplet, dd = double doublet, dt = double triplet; m = multiplet, and coupling constants (*J*) are reported in Hertz (Hz). ESI-HRMS was recorded on a Waters Xevo G2-XS using a time-of-flight mass spectrometer equipped with electrospray ionization (ESI) source. Column chromatography was performed on silica gel (100–200 mesh) eluting with ethyl acetate (EtOAc) and petroleum ether. TLC was performed on glass-backed silica plates. UV light and a solution of potassium permanganate were used to visualize products or starting materials. Petroleum ether and EtOAc were distilled. Dried solvents and liquid reagents were transferred by oven-dried syringes. Electron-deficient styrenes [1], electron-deficient cinnamates [2] and TMM donors [3] were prepared according to the literature procedures.

## 2. Detailed condition screenings

### 2.1 Detailed condition screenings for the synthesis of 3a and 4a

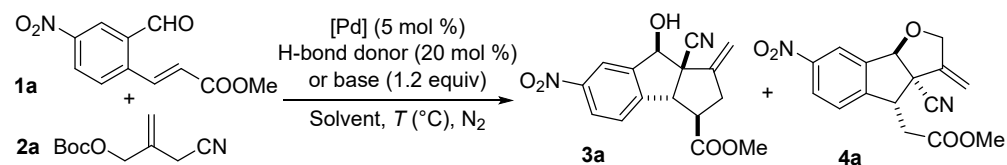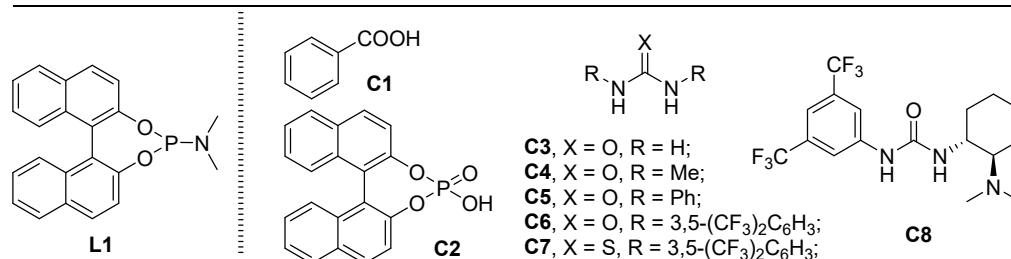

| Entry <sup>a</sup> | Solvent          | [1a] (M) | 2a/1a | T (°C) | Base | HB donor | Time (h) | 3a (%) <sup>b</sup> | 4a (%) <sup>b</sup> |
|--------------------|------------------|----------|-------|--------|------|----------|----------|---------------------|---------------------|
| 1                  | benzene          | 0.10     | 1.2   | 10     | -    | -        | 24       | 19                  | 45                  |
| 2                  | DCM              | 0.10     | 1.2   | 10     | -    | -        | 24       | 40                  | 29                  |
| 3                  | THF              | 0.10     | 1.2   | 10     | -    | -        | 10       | 82                  | trace               |
| 4                  | 1,4-dioxane      | 0.10     | 1.2   | 10     | -    | -        | 10       | 95                  | nd                  |
| 5                  | 1,3-dioxane      | 0.10     | 1.2   | 10     | -    | -        | 10       | 86                  | nd                  |
| 6                  | DME              | 0.10     | 1.2   | 10     | -    | -        | 10       | 97                  | nd                  |
| 7 <sup>c</sup>     | DME              | 0.10     | 1.2   | 10     | -    | -        | 10       | 27                  | 31                  |
| 8 <sup>d</sup>     | DME              | 0.10     | 1.2   | 10     | -    | -        | 10       | 33                  | trace               |
| 9 <sup>e</sup>     | DME              | 0.10     | 1.2   | 10     | -    | -        | 10       | trace               | trace               |
| 10                 | benzene          | 0.10     | 1.2   | 10     | -    | -        | 24       | 19                  | 45                  |
| 11                 | toluene          | 0.10     | 1.2   | 10     | -    | -        | 24       | 13                  | 49                  |
| 12                 | <i>p</i> -xylene | 0.10     | 1.2   | 10     | -    | -        | 24       | 18                  | 48                  |
| 13                 | mesitylene       | 0.10     | 1.2   | 10     | -    | -        | 24       | 18                  | 51                  |
| 14                 | chlorobenzene    | 0.10     | 1.2   | 10     | -    | -        | 24       | 12                  | 32                  |
| 15                 | mesitylene       | 0.03     | 1.2   | 10     | -    | -        | 24       | 13                  | 55                  |
| 16                 | mesitylene       | 0.05     | 1.2   | 10     | -    | -        | 24       | 15                  | 61                  |
| 17                 | mesitylene       | 0.20     | 1.2   | 10     | -    | -        | 24       | 13                  | 40                  |
| 18                 | mesitylene       | 0.05     | 0.8   | 10     | -    | -        | 48       | 12                  | 35                  |
| 19                 | mesitylene       | 0.05     | 1.0   | 10     | -    | -        | 48       | 16                  | 39                  |
| 20                 | mesitylene       | 0.05     | 1.4   | 10     | -    | -        | 24       | 20                  | 63                  |

|                 |            |      |     |    |                                 |           |    |       |    |
|-----------------|------------|------|-----|----|---------------------------------|-----------|----|-------|----|
| 21              | mesitylene | 0.05 | 1.6 | 10 | -                               | -         | 24 | 21    | 62 |
| 22              | mesitylene | 0.05 | 1.4 | 30 | -                               | -         | 24 | 19    | 61 |
| 23              | mesitylene | 0.05 | 1.4 | 60 | -                               | -         | 24 | 16    | 28 |
| 24              | mesitylene | 0.05 | 1.6 | 10 | K <sub>2</sub> CO <sub>3</sub>  | -         | 24 | nd    | 55 |
| 25              | mesitylene | 0.05 | 1.6 | 10 | Cs <sub>2</sub> CO <sub>3</sub> | -         | 24 | 9     | 57 |
| 26              | mesitylene | 0.05 | 1.6 | 10 | <i>t</i> -BuOK                  | -         | 24 | nd    | nd |
| 27              | mesitylene | 0.05 | 1.6 | 10 | Et <sub>3</sub> N               | -         | 24 | 12    | 61 |
| 28              | mesitylene | 0.05 | 1.6 | 10 | DBU                             | -         | 24 | 10    | nd |
| 29              | mesitylene | 0.05 | 1.6 | 10 | -                               | <b>C1</b> | 24 | 10    | 65 |
| 30              | mesitylene | 0.05 | 1.6 | 10 | -                               | <b>C2</b> | 24 | nd    | nd |
| 31              | mesitylene | 0.05 | 1.6 | 10 | -                               | <b>C3</b> | 5  | nd    | 78 |
| 32              | mesitylene | 0.05 | 1.6 | 10 | -                               | <b>C4</b> | 5  | nd    | 80 |
| 33              | mesitylene | 0.05 | 1.6 | 10 | -                               | <b>C5</b> | 5  | nd    | 89 |
| 34              | mesitylene | 0.05 | 1.6 | 10 | -                               | <b>C6</b> | 5  | nd    | 92 |
| 35              | mesitylene | 0.05 | 1.6 | 10 | -                               | <b>C7</b> | 5  | nd    | 81 |
| 36              | mesitylene | 0.05 | 1.6 | 10 | -                               | <b>C8</b> | 5  | nd    | 91 |
| 37 <sup>c</sup> | mesitylene | 0.05 | 1.6 | 10 | -                               | <b>C6</b> | 5  | trace | 76 |
| 38 <sup>d</sup> | mesitylene | 0.05 | 1.6 | 10 | -                               | <b>C6</b> | 5  | nd    | nd |
| 39 <sup>e</sup> | mesitylene | 0.05 | 1.6 | 10 | -                               | <b>C6</b> | 5  | trace | nd |

<sup>a</sup>Unless noted otherwise, reactions were performed with **1a** (0.1 mmol), **2a** (0.12 mmol), Pd(PPh<sub>3</sub>)<sub>4</sub> (5 mol %), base (1.2 equiv) and H-bond donor (20 mol %) in solvent (1.0 mL) under N<sub>2</sub> atmosphere at 10 °C.

<sup>b</sup>Isolated yield.

<sup>c</sup>with Pd<sub>2</sub>(dba)<sub>3</sub> (2.5 mol %) and PPh<sub>3</sub> (10 mol %).

<sup>d</sup>with Pd(OAc)<sub>2</sub> (5 mol %) and PPh<sub>3</sub> (10 mol %).

<sup>e</sup>with Pd<sub>2</sub>(dba)<sub>3</sub> (2.5 mol %) and **L1** (10 mol %).

## 2.2 Detailed condition screenings for the synthesis of 6a

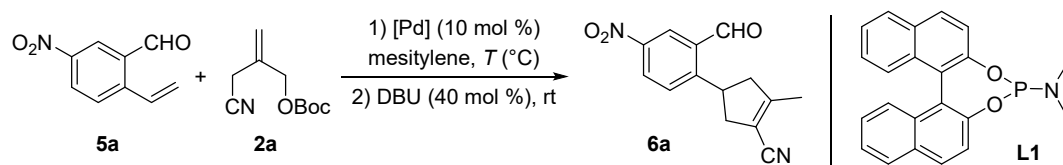

| Entry <sup>a</sup> | <i>T</i> (°C) | [ <b>5a</b> ] (M) | <b>2a/5a</b> | <b>6a</b> (%) <sup>b</sup> |
|--------------------|---------------|-------------------|--------------|----------------------------|
| 1                  | 10            | 0.05              | 1.4          | 66                         |
| 2                  | 25            | 0.05              | 1.4          | 70                         |
| 3                  | 40            | 0.05              | 1.4          | 75                         |
| 4                  | 65            | 0.05              | 1.4          | 70                         |
| 5                  | 40            | 0.03              | 1.4          | 75                         |
| 6                  | 40            | 0.10              | 1.4          | 79                         |
| 7                  | 40            | 0.20              | 1.4          | 76                         |
| 8                  | 40            | 0.10              | 1.6          | 87                         |
| 9                  | 40            | 0.10              | 1.8          | 94                         |
| 10                 | 40            | 0.10              | 2.0          | 95                         |
| 11 <sup>c</sup>    | 40            | 0.10              | 2.0          | 86                         |
| 12 <sup>d</sup>    | 40            | 0.10              | 2.0          | 71                         |
| 13 <sup>e</sup>    | 40            | 0.10              | 2.0          | trace                      |

<sup>a</sup>Unless noted otherwise, reactions were performed with **5a** (0.1 mmol), **2a** (0.14 mmol) and Pd(PPh<sub>3</sub>)<sub>4</sub> (10 mol %) in mesitylene (1.0 mL) under N<sub>2</sub> atmosphere for 12 h. After full conversion, the mixture was cooled to room temperature, and 40% DBU were added in situ at room temperature for 10 min.

<sup>b</sup>Isolated yield.

<sup>c</sup>with Pd<sub>2</sub>(dba)<sub>3</sub> (5 mol %) and PPh<sub>3</sub> (20 mol %).

<sup>d</sup>with Pd(OAc)<sub>2</sub> (10 mol %) and PPh<sub>3</sub> (20 mol %).

<sup>e</sup>with Pd<sub>2</sub>(dba)<sub>3</sub> (5 mol %) and **L1** (20 mol %).

### 3. General procedure for the synthesis of cycloadducts 3a–m

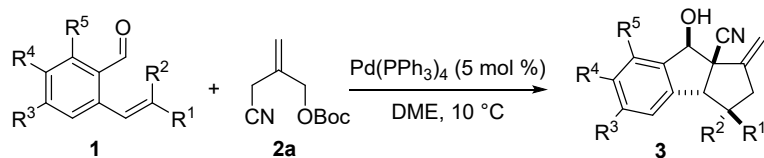

**General procedure A:** An oven-dried 5 mL test-tube equipped with a septum and a magnetic stir bar was charged with *ortho*-formyl-substituted cinnamate **1** (0.10 mmol, 1.0 equiv) and Pd(PPh<sub>3</sub>)<sub>4</sub> (5.8 mg, 0.0050 mmol, 5 mol % or 11.6 mg, 0.0100 mmol, 10 mol %). The tube was capped, evacuated and back-filled with nitrogen for three times. Then degassed anhydrous DME (1.0 mL) and TMM donor **2a** (23.6 mg, 0.12 mmol, 1.2 equiv) were added via syringe in sequence, and the tube was evacuated and back-filled with nitrogen for three times again. The resulting mixture was stirred at 10 °C for 10–48 h, and monitored by TLC (petroleum ether/EtOAc = 6/1). After completion, the solvent was evaporated in vacuo. Purification by flash chromatography on silica gel (petroleum ether/EtOAc = 10/1) gave the product **3a–m**.

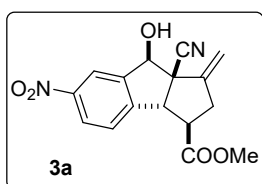

**Synthesis of 3a by general procedure A:** An oven-dried 5 mL test-tube equipped with a septum and a magnetic stir bar was charged with methyl (*E*)-3-(2-formyl-4-nitrophenyl)acrylate **1a** (23.5 mg, 0.100 mmol, 1.0 equiv) and Pd(PPh<sub>3</sub>)<sub>4</sub> (5.8 mg, 0.0050 mmol, 5 mol %). The tube was capped, evacuated and back-filled with nitrogen for three times. Then degassed anhydrous DME (1.0 mL) and TMM donor **2a** (23.6 mg, 0.120 mmol, 1.2 equiv) were added via syringe in sequence, and the tube was evacuated and back-filled with nitrogen for three times again. The resulting mixture was stirred at 10 °C for 10 h, and monitored by TLC (petroleum ether/EtOAc = 6/1). After completion, the solvent was evaporated in vacuo. Purification by flash chromatography on silica gel (petroleum ether/EtOAc = 10/1) gave the product **3a**: 30.5 mg, 97% yield, >20:1 dr, as a colorless oil; <sup>1</sup>H NMR (600 MHz, CDCl<sub>3</sub>): δ (ppm) 8.27 (s, 1H), 8.26 (dd, *J* = 8.4, 2.4 Hz, 1H), 7.49 (d, *J* = 8.4 Hz, 1H), 5.59 (s, 1H), 5.38 (s, 1H), 5.27 (s, 1H), 4.57 (d, *J* = 4.8 Hz, 1H), 3.82 (s, 3H), 3.69 (s, 1H), 3.09–3.02 (m, 1H), 2.99–2.91 (m, 1H), 2.55 (dd, *J* = 16.8, 7.8 Hz, 1H); <sup>13</sup>C NMR (150 MHz, CDCl<sub>3</sub>): δ (ppm) 172.7, 148.8, 148.3, 146.6, 142.9, 125.6, 125.5, 121.2, 119.5, 114.2, 82.2, 59.5, 57.2, 52.7, 48.5, 36.0; HRMS (ESI-TOF) *m/z*: [M + Na]<sup>+</sup> Calcd. for C<sub>16</sub>H<sub>14</sub>N<sub>2</sub>O<sub>5</sub>Na<sup>+</sup> 337.0795, found 337.0799.

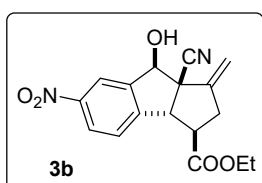

**Synthesis of 3b by general procedure A:** An oven-dried 5 mL test-tube equipped with a septum and a magnetic stir bar was charged with ethyl (*E*)-3-(2-formyl-4-nitrophenyl)acrylate **1b** (25.0 mg, 0.100 mmol, 1.0 equiv) and

Pd(PPh<sub>3</sub>)<sub>4</sub> (5.8 mg, 0.0050 mmol, 5 mol %). The tube was capped, evacuated and back-filled with nitrogen for three times. Then degassed anhydrous DME (1.0 mL) and TMM donor **2a** (23.6 mg, 0.120 mmol, 1.2 equiv) were added via syringe in sequence, and the tube was evacuated and back-filled with nitrogen for three times again. The resulting mixture was stirred at 10 °C for 10 h, and monitored by TLC (petroleum ether/EtOAc = 6/1). After completion, the solvent was evaporated in vacuo. Purification by flash chromatography on silica gel (petroleum ether/EtOAc = 10/1) gave the product **3b**: 29.2 mg, 89% yield, >20:1 dr, as a colorless oil; <sup>1</sup>H NMR (600 MHz, CDCl<sub>3</sub>): δ (ppm) 8.28 (s, 1H), 8.27 (d, *J* = 8.4 Hz, 1H), 7.50 (d, *J* = 8.4 Hz, 1H), 5.59 (s, 1H), 5.38 (s, 1H), 5.27 (d, *J* = 4.8 Hz, 1H), 4.57 (d, *J* = 4.8 Hz, 1H), 4.33–4.23 (m, 2H), 3.54–3.38 (m, 1H), 3.09–3.00 (m, 1H), 2.99–2.91 (m, 1H), 2.64–2.48 (m, 1H), 1.34 (t, *J* = 7.2 Hz, 3H); <sup>13</sup>C NMR (150 MHz, CDCl<sub>3</sub>): δ (ppm) 172.2, 148.8, 148.4, 146.7, 142.9, 125.6, 125.5, 121.2, 119.5, 114.1, 82.3, 61.9, 59.6, 57.2, 48.7, 36.1, 14.2; HRMS (ESI-TOF) *m/z*: [M + Na]<sup>+</sup> Calcd. for C<sub>17</sub>H<sub>16</sub>N<sub>2</sub>O<sub>5</sub>Na<sup>+</sup> 351.0951, found 351.0959.

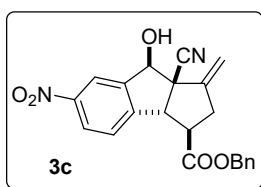

**Synthesis of 3c by general procedure A:** An oven-dried 5 mL test-tube equipped with a septum and a magnetic stir bar was charged with benzyl (*E*)-3-(2-formyl-4-nitrophenyl)acrylate **1c** (31.1 mg, 0.100 mmol, 1.0 equiv) and Pd(PPh<sub>3</sub>)<sub>4</sub> (5.8 mg, 0.0050 mmol, 5 mol %). The tube was capped, evacuated

and back-filled with nitrogen for three times. Then degassed anhydrous DME (1.0 mL) and TMM donor **2a** (23.6 mg, 0.120 mmol, 1.2 equiv) were added via syringe in sequence, and the tube was evacuated and back-filled with nitrogen for three times again. The resulting mixture was stirred at 10 °C for 10 h, and monitored by TLC (petroleum ether/EtOAc = 6/1). After completion, the solvent was evaporated in vacuo. Purification by flash chromatography on silica gel (petroleum ether/EtOAc = 10/1) gave the product **3c**: 35.6 mg, 91% yield, >20:1 dr, as a colorless oil; <sup>1</sup>H NMR (600 MHz, CDCl<sub>3</sub>): δ (ppm) 8.26 (s, 1H), 8.24–8.15 (m, 1H), 7.46–7.30 (m, 6H), 5.58 (s, 1H), 5.37 (s, 1H), 5.29–5.18 (m, 3H), 4.55 (d, *J* = 4.8 Hz, 1H), 3.44 (s, 1H), 3.16–3.01 (m, 1H), 3.01–2.91 (m, 1H), 2.63–2.50 (m, 1H); <sup>13</sup>C NMR (150 MHz, CDCl<sub>3</sub>): δ (ppm) 172.0, 148.8, 148.1, 146.5, 142.8, 135.2, 128.78, 128.76, 128.7, 125.6, 125.5, 121.1, 119.4, 114.1, 82.2, 67.6, 59.8, 57.2, 48.7, 36.2; HRMS (ESI-TOF) *m/z*: [M + Na]<sup>+</sup> Calcd. for C<sub>22</sub>H<sub>18</sub>N<sub>2</sub>O<sub>5</sub>Na<sup>+</sup> 413.1108, found 413.1112.

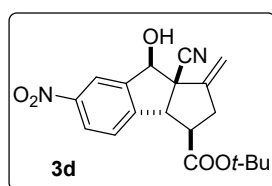

**Synthesis of 3d by general procedure A:** An oven-dried 5 mL test-tube equipped with a septum and a magnetic stir bar was charged with *tert*-butyl (*E*)-3-(2-formyl-4-nitrophenyl)acrylate **1d** (27.7 mg, 0.100 mmol, 1.0 equiv) and Pd(PPh<sub>3</sub>)<sub>4</sub> (5.8 mg, 0.0050 mmol, 5 mol %). The tube was capped,

evacuated and back-filled with nitrogen for three times. Then degassed anhydrous DME (1.0 mL)



and TMM donor **2a** (23.6 mg, 0.120 mmol, 1.2 equiv) were added via syringe in sequence, and the tube was evacuated and back-filled with nitrogen for three times again. The resulting mixture was stirred at 10 °C for 20 h, and monitored by TLC (petroleum ether/EtOAc = 6/1). After completion, the solvent was evaporated in vacuo. Purification by flash chromatography on silica gel (petroleum ether/EtOAc = 10/1) gave the product **3d**: 32.3 mg, 91% yield, >20:1 dr, as a colorless oil; <sup>1</sup>H NMR (600 MHz, CDCl<sub>3</sub>): δ (ppm) 8.29–8.24 (m, 2H), 7.50 (d, *J* = 8.4 Hz, 1H), 5.57 (s, 1H), 5.37 (s, 1H), 5.25 (d, *J* = 6.0 Hz, 1H), 4.54 (d, *J* = 3.6 Hz, 1H), 3.57 (s, 1H), 2.97–2.88 (m, 2H), 2.54–2.39 (m, 1H), 1.52 (s, 9H); <sup>13</sup>C NMR (150 MHz, CDCl<sub>3</sub>): δ (ppm) 171.3, 148.7, 147.1, 142.9, 125.5, 125.5, 121.1, 119.6, 113.8, 82.7, 82.3, 59.4, 57.3, 49.7, 36.0, 28.0; HRMS (ESI-TOF) *m/z*: [M + Na]<sup>+</sup> Calcd. for C<sub>19</sub>H<sub>20</sub>N<sub>2</sub>O<sub>5</sub>Na<sup>+</sup> 379.1264, found 379.1273.

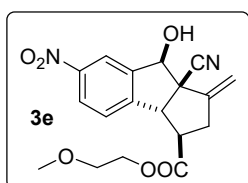

**Synthesis of 3e by general procedure A:** An oven-dried 5 mL test-tube equipped with a septum and a magnetic stir bar was charged with 2-methoxyethyl (*Z*)-3-(2-formyl-4-nitrophenyl)acrylate **1e** (27.9 mg, 0.100 mmol, 1.0 equiv) and Pd(PPh<sub>3</sub>)<sub>4</sub> (5.8 mg, 0.0050 mmol, 5 mol %). The tube

was capped, evacuated and back-filled with nitrogen for three times. Then degassed anhydrous DME (1.0 mL) and TMM donor **2a** (23.6 mg, 0.120 mmol, 1.2 equiv) were added via syringe in sequence, and the tube was evacuated and back-filled with nitrogen for three times again. The resulting mixture was stirred at 10 °C for 10 h, and monitored by TLC (petroleum ether/EtOAc = 6/1). After completion, the solvent was evaporated in vacuo. Purification by flash chromatography on silica gel (petroleum ether/EtOAc = 10/1) gave the product **3e**: 34.4 mg, 96% yield, >20:1 dr, as a colorless oil; <sup>1</sup>H NMR (600 MHz, CDCl<sub>3</sub>): δ (ppm) 8.27 (s, 1H), 8.26 (d, *J* = 8.4 Hz, 1H), 7.53 (d, *J* = 8.4 Hz, 1H), 5.59 (s, 1H), 5.38 (s, 1H), 5.26 (d, *J* = 6.0 Hz, 1H), 4.56 (d, *J* = 4.8 Hz, 1H), 4.46–4.38 (m, 1H), 4.36–4.30 (m, 1H), 3.68–3.63 (m, 2H), 3.42 (s, 1H), 3.41 (s, 3H), 3.10–3.03 (m, 1H), 3.03–2.96 (m, 1H), 2.66–2.55 (m, 1H); <sup>13</sup>C NMR (150 MHz, CDCl<sub>3</sub>): δ (ppm) 172.1, 148.8, 148.1, 146.6, 142.9, 125.7, 125.6, 121.0, 119.4, 114.1, 82.2, 70.2, 64.5, 59.8, 59.0, 57.2, 48.5, 36.2; HRMS (ESI-TOF) *m/z*: [M + Na]<sup>+</sup> Calcd. for C<sub>18</sub>H<sub>18</sub>N<sub>2</sub>O<sub>6</sub>Na<sup>+</sup> 381.1057, found 381.1064.

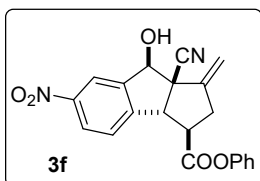

**Synthesis of 3f by general procedure A:** An oven-dried 5 mL test-tube equipped with a septum and a magnetic stir bar was charged with 2-phenyl (*Z*)-3-(2-formyl-4-nitrophenyl)acrylate **1f** (29.7 mg, 0.100 mmol, 1.0 equiv) and Pd(PPh<sub>3</sub>)<sub>4</sub> (5.8 mg, 0.0050 mmol, 5 mol %). The tube was capped,

evacuated and back-filled with nitrogen for three times. Then degassed anhydrous DME (1.0 mL) and TMM donor **2a** (23.6 mg, 0.120 mmol, 1.2 equiv) were added via syringe in sequence, and the tube was evacuated and back-filled with nitrogen for three times again. The resulting mixture was

stirred at 10 °C for 10 h, and monitored by TLC (petroleum ether/EtOAc = 6/1). After completion, the solvent was evaporated in vacuo. Purification by flash chromatography on silica gel (petroleum ether/EtOAc = 10/1) gave the product **3f**: 34.1 mg, 91% yield, >20:1 dr, as a colorless oil; <sup>1</sup>H NMR (600 MHz, CDCl<sub>3</sub>): δ (ppm) 8.38–8.23 (m, 2H), 7.57 (d, *J* = 8.3 Hz, 1H), 7.42 (t, *J* = 7.9 Hz, 2H), 7.28 (t, *J* = 7.5 Hz, 1H), 7.15 (d, *J* = 7.9 Hz, 2H), 5.64 (s, 1H), 5.45 (s, 1H), 5.31 (s, 1H), 4.74 (d, *J* = 4.6 Hz, 1H), 3.34–3.27 (m, 1H), 3.21 (s, 1H), 3.17–3.10 (m, 1H), 2.74–2.63 (m, 1H); <sup>13</sup>C NMR (150 MHz, CDCl<sub>3</sub>): δ (ppm) 170.9, 150.4, 148.8, 148.0, 146.3, 143.0, 129.7, 126.4, 125.7, 125.6, 121.3, 121.3, 119.5, 114.6, 82.2, 59.4, 57.2, 48.7, 35.8; HRMS (ESI-TOF) *m/z*: [M + Na]<sup>+</sup> Calcd. for C<sub>21</sub>H<sub>16</sub>N<sub>2</sub>O<sub>5</sub>Na<sup>+</sup> 399.0951, found 399.0962.

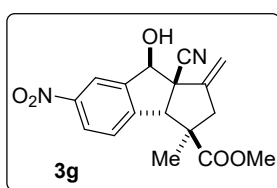

**Synthesis of 3g by general procedure A:** An oven-dried 5 mL test-tube equipped with a septum and a magnetic stir bar was charged with methyl (*E*)-3-(2-formyl-4-nitrophenyl)-2-methylacrylate **1g** (24.9 mg, 0.100 mmol, 1.0 equiv) and Pd(PPh<sub>3</sub>)<sub>4</sub> (5.8 mg, 0.0050 mmol, 5 mol %). The tube was

capped, evacuated and back-filled with nitrogen for three times. Then degassed anhydrous DME (1.0 mL) and TMM donor **2a** (23.6 mg, 0.120 mmol, 1.2 equiv) were added via syringe in sequence, and the tube was evacuated and back-filled with nitrogen for three times again. The resulting mixture was stirred at 10 °C for 10 h, and monitored by TLC (petroleum ether/EtOAc = 6/1). After completion, the solvent was evaporated in vacuo. Purification by flash chromatography on silica gel (petroleum ether/EtOAc = 10/1) gave the product **3g**: 26.5 mg, 81% yield, >20:1 dr, as a colorless oil; <sup>1</sup>H NMR (600 MHz, CDCl<sub>3</sub>): δ (ppm) 8.26 (s, 1H), 8.23 (d, *J* = 8.4 Hz, 1H), 7.55 (d, *J* = 8.4 Hz, 1H), 5.59 (s, 1H), 5.38 (s, 1H), 5.32 (s, 1H), 4.71 (s, 1H), 3.83 (s, 3H), 3.35 (s, 1H), 3.21 (d, *J* = 15.6 Hz, 1H), 2.47 (d, *J* = 15.6 Hz, 1H), 0.95 (s, 3H); <sup>13</sup>C NMR (150 MHz, CDCl<sub>3</sub>): δ (ppm) 175.5, 148.9, 146.9, 145.6, 144.5, 127.4, 124.9, 120.6, 118.9, 113.6, 82.9, 61.4, 60.1, 53.0, 51.4, 45.9, 20.9; HRMS (ESI-TOF) *m/z*: [M + Na]<sup>+</sup> Calcd. for C<sub>17</sub>H<sub>16</sub>N<sub>2</sub>O<sub>5</sub>Na<sup>+</sup> 351.0951, found 351.0952.

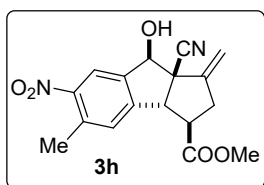

**Synthesis of 3h by general procedure A:** An oven-dried 5 mL test-tube equipped with a septum and a magnetic stir bar was charged with methyl (*E*)-3-(2-formyl-5-methyl-4-nitrophenyl)acrylate **1i** (24.9 mg, 0.100 mmol, 1.0 equiv) and Pd(PPh<sub>3</sub>)<sub>4</sub> (5.8 mg, 0.0050 mmol, 5 mol %). The tube was capped,

evacuated and back-filled with nitrogen for three times. Then degassed anhydrous DME (1.0 mL) and TMM donor **2a** (23.6 mg, 0.120 mmol, 1.2 equiv) were added via syringe in sequence, and the tube was evacuated and back-filled with nitrogen for three times again. The resulting mixture was stirred at 10 °C for 10 h, and monitored by TLC (petroleum ether/EtOAc = 6/1). After completion, the solvent was evaporated in vacuo. Purification by flash chromatography on silica gel (petroleum

ether/EtOAc = 10/1) gave the product **3h**: 31.5 mg, 96% yield, >20:1 dr, as a colorless oil; <sup>1</sup>H NMR (600 MHz, CDCl<sub>3</sub>): δ (ppm) 8.01 (s, 1H), 7.29 (s, 1H), 5.57 (s, 1H), 5.37 (s, 1H), 5.21 (s, 1H), 4.52 (d, *J* = 4.2 Hz, 1H), 3.82 (s, 3H), 3.19 (s, 1H), 3.07–3.01 (m, 1H), 2.99–2.87 (m, 1H), 2.61 (s, 3H), 2.57–2.51 (m, 1H); <sup>13</sup>C NMR (150 MHz, CDCl<sub>3</sub>): δ (ppm) 172.7, 149.9, 146.7, 146.5, 140.3, 136.1, 128.6, 122.1, 119.5, 114.1, 82.2, 59.5, 57.1, 52.7, 48.5, 36.0, 20.8; HRMS (ESI-TOF) *m/z*: [M + Na]<sup>+</sup> Calcd. for C<sub>17</sub>H<sub>16</sub>N<sub>2</sub>O<sub>5</sub>Na<sup>+</sup> 351.0951, found 351.0952.

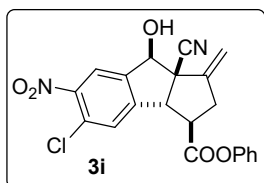

**Synthesis of 3i by general procedure A:** An oven-dried 5 mL test-tube equipped with a septum and a magnetic stir bar was charged with phenyl (*E*)-3-(5-chloro-2-formyl-4-nitrophenyl)acrylate **1i** (33.1 mg, 0.100 mmol, 1.0 equiv) and Pd(PPh<sub>3</sub>)<sub>4</sub> (5.8 mg, 0.0050 mmol, 5 mol %). The tube was capped,

evacuated and back-filled with nitrogen for three times. Then degassed anhydrous DME (1.0 mL) and TMM donor **2a** (23.6 mg, 0.120 mmol, 1.2 equiv) were added via syringe in sequence, and the tube was evacuated and back-filled with nitrogen for three times again. The resulting mixture was stirred at 10 °C for 10 h, and monitored by TLC (petroleum ether/EtOAc = 6/1). After completion, the solvent was evaporated in vacuo. Purification by flash chromatography on silica gel (petroleum ether/EtOAc = 10/1) gave the product **3i**: 34.4 mg, 84% yield, >20:1 dr, as a colorless oil; <sup>1</sup>H NMR (600 MHz, CDCl<sub>3</sub>): δ (ppm) 7.91 (s, 1H), 7.58 (s, 1H), 7.42 (t, *J* = 7.8 Hz, 2H), 7.28 (t, *J* = 7.2 Hz, 1H), 7.14 (d, *J* = 7.8 Hz, 2H), 5.61 (s, 1H), 5.44 (s, 1H), 5.23 (s, 1H), 4.68 (d, *J* = 4.2 Hz, 1H), 3.73 (s, 1H), 3.31–3.21 (m, 1H), 3.13 (dd, *J* = 16.8, 5.4 Hz, 1H), 2.70 (dd, *J* = 16.8, 7.8 Hz, 1H); <sup>13</sup>C NMR (150 MHz, CDCl<sub>3</sub>): δ (ppm) 170.6, 150.3, 148.6, 146.5, 145.9, 141.2, 129.7, 129.0, 128.1, 126.5, 122.9, 121.3, 119.2, 114.8, 81.9, 59.5, 57.0, 48.6, 35.9; HRMS (ESI-TOF) *m/z*: [M + H]<sup>+</sup> Calcd. for C<sub>21</sub>H<sub>16</sub><sup>35</sup>ClN<sub>2</sub>O<sub>5</sub><sup>+</sup> 411.0743, found 411.0745; Calcd. for C<sub>21</sub>H<sub>16</sub><sup>37</sup>ClN<sub>2</sub>O<sub>5</sub><sup>+</sup> 413.0713, found 413.0701.

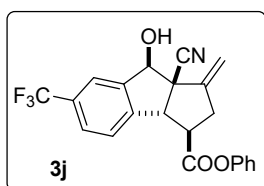

**Synthesis of 3j by general procedure A:** An oven-dried 5 mL test-tube equipped with a septum and a magnetic stir bar was charged with phenyl (*E*)-3-(2-formyl-4-(trifluoromethyl)phenyl)acrylate **1j** (32.0 mg, 0.100 mmol, 1.0 equiv) and Pd(PPh<sub>3</sub>)<sub>4</sub> (11.6 mg, 0.010 mmol, 10 mol %). The tube was capped,

evacuated and back-filled with nitrogen for three times. Then degassed anhydrous DME (1.0 mL) and TMM donor **2a** (23.6 mg, 0.120 mmol, 1.2 equiv) were added via syringe in sequence, and the tube was evacuated and back-filled with nitrogen for three times again. The resulting mixture was stirred at 10 °C for 10 h, and monitored by TLC (petroleum ether/EtOAc = 6/1). After completion, the solvent was evaporated in vacuo. Purification by flash chromatography on silica gel (petroleum ether/EtOAc = 10/1) gave the product **3j**: 38.8 mg, 97% yield, >20:1 dr, as a colorless oil; <sup>1</sup>H NMR (600 MHz, CDCl<sub>3</sub>): δ (ppm) 7.71 (s, 1H), 7.68 (d, *J* = 8.4 Hz, 1H), 7.51 (d, *J* = 9.0 Hz, 1H), 7.46–7.36

(m, 2H), 7.33–7.26 (m, 1H), 7.16 (d,  $J = 6.6$  Hz, 2H), 5.62 (s, 1H), 5.42 (s, 1H), 5.27 (s, 1H), 4.72 (s, 1H), 3.34–3.22 (m, 1H), 3.10 (d,  $J = 16.8$  Hz, 1H), 2.67–2.57 (m, 1H);  $^{13}\text{C}$  NMR (150 MHz,  $\text{CDCl}_3$ ):  $\delta$  (ppm) 171.0, 150.4, 146.7, 145.0, 141.9, 131.6 (q,  $J = 32.4$  Hz), 129.7, 127.5 (d,  $J = 3.8$  Hz), 126.3, 125.1, 122.9 (d,  $J = 4.4$  Hz), 121.3, 119.7, 114.3, 82.8, 59.1, 57.4, 48.8, 35.7;  $^{19}\text{F}$  NMR (565 MHz,  $\text{CDCl}_3$ )  $\delta$  (ppm)  $-62.4$ ; HRMS (ESI-TOF)  $m/z$ :  $[\text{M} + \text{H}]^+$  Calcd. for  $\text{C}_{22}\text{H}_{17}\text{F}_3\text{NO}_3^+$  400.1155, found 400.1159.

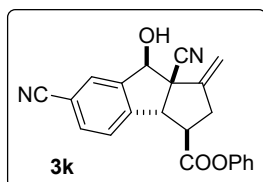

**Synthesis of 3k by general procedure A:** An oven-dried 5 mL test-tube equipped with a septum and a magnetic stir bar was charged with phenyl (*E*)-3-(4-cyano-2-formylphenyl)acrylate **1k** (27.7 mg, 0.100 mmol, 1.0 equiv) and  $\text{Pd}(\text{PPh}_3)_4$  (11.6 mg, 0.010 mmol, 10 mol %). The tube was capped, evacuated and back-filled with nitrogen for three times. Then degassed anhydrous DME (1.0 mL) and TMM donor **2a** (23.6 mg, 0.120 mmol, 1.2 equiv) were added via syringe in sequence, and the tube was evacuated and back-filled with nitrogen for three times again. The resulting mixture was stirred at 10

$^\circ\text{C}$  for 48 h, and monitored by TLC (petroleum ether/EtOAc = 6/1). After completion, the solvent was evaporated in vacuo. Purification by flash chromatography on silica gel (petroleum ether/EtOAc = 10/1) gave the product **3k**: 11.6 mg, 33% yield,  $>20:1$  dr, as a colorless oil;  $^1\text{H}$  NMR (600 MHz,  $\text{CDCl}_3$ ):  $\delta$  (ppm) 7.75 (s, 1H), 7.71 (d,  $J = 7.8$  Hz, 1H), 7.53 (d,  $J = 8.4$  Hz, 1H), 7.42 (t,  $J = 7.8$  Hz, 2H), 7.28 (t,  $J = 7.2$  Hz, 1H), 7.15 (d,  $J = 8.4$  Hz, 2H), 5.62 (s, 1H), 5.44 (s, 1H), 5.27 (s, 1H), 4.71 (d,  $J = 4.2$  Hz, 1H), 3.29–3.24 (m, 1H), 3.23–3.07 (m, 2H), 2.66 (dd,  $J = 16.8, 7.8$  Hz, 1H);  $^{13}\text{C}$  NMR (150 MHz,  $\text{CDCl}_3$ ):  $\delta$  (ppm) 170.9, 150.4, 146.4, 146.3, 142.5, 134.0, 129.7, 129.7, 126.4, 125.6, 121.3, 119.6, 118.2, 114.5, 113.0, 82.4, 59.0, 57.6, 48.7, 35.8; HRMS (ESI-TOF)  $m/z$ :  $[\text{M} + \text{Na}]^+$  Calcd. for  $\text{C}_{22}\text{H}_{16}\text{N}_2\text{O}_3\text{Na}^+$  379.1053, found 379.1053.

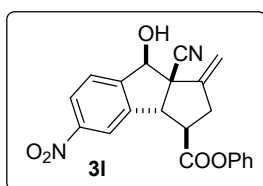

**Synthesis of 3l by general procedure A:** An oven-dried 5 mL test-tube equipped with a septum and a magnetic stir bar was charged with phenyl (*E*)-3-(2-formyl-5-nitrophenyl)acrylate **1l** (29.7 mg, 0.100 mmol, 1.0 equiv) and  $\text{Pd}(\text{PPh}_3)_4$  (5.8 mg, 0.0050 mmol, 5 mol %). The tube was capped, evacuated and back-filled with nitrogen for three times. Then degassed anhydrous DME (1.0 mL) and TMM donor **2a** (23.6 mg, 0.120 mmol, 1.2 equiv) were added via syringe in sequence, and the tube was evacuated and back-filled with nitrogen for three times again. The resulting mixture was stirred at 10

$^\circ\text{C}$  for 10 h, and monitored by TLC (petroleum ether/EtOAc = 6/1). After completion, the solvent was evaporated in vacuo. Purification by flash chromatography on silica gel (petroleum ether/EtOAc = 10/1) gave the product **3l**: 36.4 mg, 97% yield,  $>20:1$  dr, as a colorless oil;  $^1\text{H}$  NMR (600 MHz,  $\text{CDCl}_3$ ):  $\delta$  (ppm) 8.29–8.23 (m, 2H), 7.62 (d,  $J = 7.8$  Hz, 1H), 7.43 (t,  $J = 7.8$  Hz, 2H), 7.29 (t,  $J = 7.8$

Hz, 1H), 7.17 (d,  $J = 8.4$  Hz, 2H), 5.63 (s, 1H), 5.45 (s, 1H), 5.29 (s, 1H), 4.74 (d,  $J = 4.4$  Hz, 1H), 3.36–3.31 (m, 1H), 3.29 (s, 1H), 3.14 (dd,  $J = 16.8, 4.8$  Hz, 1H), 2.68 (dd,  $J = 16.8, 7.8$  Hz, 1H);  $^{13}\text{C}$  NMR (150 MHz,  $\text{CDCl}_3$ ):  $\delta$  (ppm) 170.7, 150.4, 149.7, 147.6, 146.3, 142.8, 129.7, 126.7, 126.4, 124.6, 121.3, 120.1, 119.3, 114.6, 82.3, 59.5, 57.1, 48.7, 35.9; HRMS (ESI-TOF)  $m/z$ :  $[\text{M} + \text{H}]^+$  Calcd. for  $\text{C}_{21}\text{H}_{17}\text{N}_2\text{O}_5^+$  377.1132, found 377.1130.

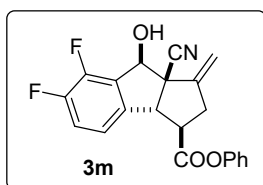

**Synthesis of 3m by general procedure A:** An oven-dried 5 mL test-tube equipped with a septum and a magnetic stir bar was charged with phenyl phenyl (*E*)-3-(3,4-difluoro-2-formylphenyl)acrylate **1m** (28.8 mg, 0.100 mmol, 1.0 equiv) and  $\text{Pd}(\text{PPh}_3)_4$  (5.8 mg, 0.0050 mmol, 5 mol %). The tube

was capped, evacuated and back-filled with nitrogen for three times. Then degassed anhydrous DME (1.0 mL) and TMM donor **2a** (23.6 mg, 0.120 mmol, 1.2 equiv) were added via syringe in sequence, and the tube was evacuated and back-filled with nitrogen for three times again. The resulting mixture was stirred at 50 °C for 48 h, and monitored by TLC (petroleum ether/EtOAc = 6/1). After completion, the solvent was evaporated in vacuo. Purification by flash chromatography on silica gel (petroleum ether/EtOAc = 10/1) gave the product **3m**: 33.1 mg, 45% yield, >20:1 dr, as a colorless oil;  $^1\text{H}$  NMR (600 MHz,  $\text{CDCl}_3$ ):  $\delta$  (ppm) 7.40 (t,  $J = 7.8$  Hz, 2H), 7.29–7.21 (m, 2H), 7.17 (d,  $J = 7.8$  Hz, 2H), 7.08 (dd,  $J = 8.4, 3.6$  Hz, 1H), 5.61 (s, 1H), 5.43 (s, 1H), 5.42 (s, 1H), 4.75 (s, 1H), 3.36 (s, 1H), 3.33 (dt,  $J = 7.8, 3.0$  Hz, 1H), 3.05 (d,  $J = 16.8$  Hz, 1H), 2.51–2.37 (m, 1H);  $^{13}\text{C}$  NMR (150 MHz,  $\text{CDCl}_3$ ):  $\delta$  (ppm) 171.1, 150.5, 150.3 (dd,  $J = 248.1, 11.6$  Hz), 147.4 (dd,  $J = 253.6, 13.7$  Hz), 129.6, 126.3, 121.4, 120.2 (d,  $J = 18.6$  Hz), 119.8 (dd,  $J = 7.1, 3.5$  Hz), 119.7, 115.0, 79.9, 58.5, 57.3, 48.8, 34.7;  $^{19}\text{F}$  NMR (565 MHz,  $\text{CDCl}_3$ )  $\delta$  (ppm) –138.0, –141.3; HRMS (ESI-TOF)  $m/z$ :  $[\text{M} + \text{Na}]^+$  Calcd. for  $\text{C}_{21}\text{H}_{15}\text{F}_2\text{NO}_3\text{Na}^+$  390.0912, found 390.0916.

## 4. General procedure for the synthesis of cycloadducts 4a–f

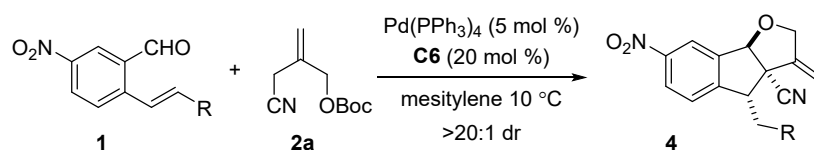

**General procedure B:** An oven-dried 5 mL test-tube equipped with a septum and a magnetic stir bar was charged with *ortho*-formyl-substituted cinnamate **1** (0.10 mmol, 1.0 equiv), Pd(PPh<sub>3</sub>)<sub>4</sub> (5.8 mg, 0.0050 mmol, 5 mol % or 11.6 mg, 0.0100 mmol, 5 mol %) and **C6** (9.6 mg, 0.020 mmol, 20 mol %). The tube was capped, evacuated and back-filled with nitrogen for three times. Then degassed anhydrous mesitylene (2.0 mL) and TMM donor **2a** (27.6 mg, 0.14 mmol, 1.4 equiv) were added via syringe in sequence, and the tube was evacuated and back-filled with nitrogen for three times again. The resulting mixture was stirred at 10 °C for 5–24 h, and monitored by TLC (petroleum ether/EtOAc = 6/1). After completion, the solvent was evaporated in vacuo. Purification by flash chromatography on silica gel (petroleum ether/EtOAc = 10/1) gave the product **4a–f**.

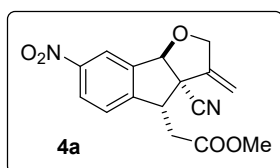

**Synthesis of 4a by general procedure B:** An oven-dried 5 mL test-tube equipped with a septum and a magnetic stir bar was charged with methyl (*E*)-3-(2-formyl-4-nitrophenyl)acrylate **1a** (23.5 mg, 0.100 mmol, 1.0 equiv), Pd(PPh<sub>3</sub>)<sub>4</sub> (5.8 mg, 0.0050 mmol, 5 mol %) and **C6** (9.6 mg, 0.020

mmol, 20 mol %). The tube was capped, evacuated and back-filled with nitrogen for three times. Then degassed anhydrous mesitylene (2.0 mL) and TMM donor **2a** (27.6 mg, 0.140 mmol, 1.4 equiv) were added via syringe in sequence, and the tube was evacuated and back-filled with nitrogen for three times again. The resulting mixture was stirred at 10 °C for 5 h, and monitored by TLC (petroleum ether/EtOAc = 6/1). After completion, the solvent was evaporated in vacuo. Purification by flash chromatography on silica gel (petroleum ether/EtOAc = 10/1) gave the product **4a**: 29.0 mg, 92% yield, >20:1 dr, as a yellow oil; <sup>1</sup>H NMR (600 MHz, CDCl<sub>3</sub>): δ (ppm) 8.29 (s, 1H), 8.23 (dd, *J* = 8.4, 2.4 Hz, 1H), 7.40 (d, *J* = 8.4 Hz, 1H), 6.01 (s, 1H), 5.66 (d, *J* = 1.8 Hz, 1H), 5.35 (d, *J* = 1.8 Hz, 1H), 4.65 (dt, *J* = 13.8, 1.8 Hz, 1H), 4.13 (dt, *J* = 13.8, 1.8 Hz, 1H), 4.07 (t, *J* = 6.6 Hz, 1H), 3.76 (s, 3H), 3.08 (dd, *J* = 17.4, 7.2 Hz, 1H), 2.81 (dd, *J* = 17.4, 7.2 Hz, 1H); <sup>13</sup>C NMR (150 MHz, CDCl<sub>3</sub>): δ (ppm) 171.0, 149.2, 148.9, 147.9, 140.4, 125.7, 125.5, 121.1, 118.9, 111.4, 90.4, 70.5, 54.4, 52.3, 49.6, 38.4; HRMS (ESI-TOF) *m/z*: [M + Na]<sup>+</sup> Calcd. for C<sub>16</sub>H<sub>14</sub>N<sub>2</sub>O<sub>5</sub>Na<sup>+</sup> 337.0795, found 337.0803.

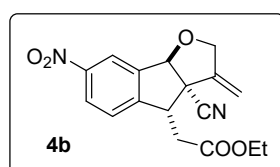

**Synthesis of 4b by general procedure B:** An oven-dried 5 mL test-tube equipped with a septum and a magnetic stir bar was charged with ethyl (*E*)-

3-(2-formyl-4-nitrophenyl)acrylate **1b** (25.0 mg, 0.100 mmol, 1.0 equiv), Pd(PPh<sub>3</sub>)<sub>4</sub> (5.8 mg, 0.0050 mmol, 5 mol %) and **C6** (9.6 mg, 0.020 mmol, 20 mol %). The tube was capped, evacuated and back-filled with nitrogen for three times. Then degassed anhydrous mesitylene (2.0 mL) and TMM donor **2a** (27.6 mg, 0.140 mmol, 1.4 equiv) were added via syringe in sequence, and the tube was evacuated and back-filled with nitrogen for three times again. The resulting mixture was stirred at 10 °C for 5 h, and monitored by TLC (petroleum ether/EtOAc = 6/1). After completion, the solvent was evaporated in vacuo. Purification by flash chromatography on silica gel (petroleum ether/EtOAc = 10/1) gave the product **4b**: 30.9 mg, 94% yield, >20:1 dr, as a pale yellow oil; <sup>1</sup>H NMR (600 MHz, CDCl<sub>3</sub>): δ (ppm) 8.29 (s, 1H), 8.23 (dd, *J* = 8.4, 1.8 Hz, 1H), 7.40 (d, *J* = 8.4 Hz, 1H), 6.01 (s, 1H), 5.66 (s, 1H), 5.35 (s, 1H), 4.65 (d, *J* = 13.8 Hz, 1H), 4.26–4.18 (m, 2H), 4.13 (d, *J* = 13.2 Hz, 1H), 4.07 (t, *J* = 7.2 Hz, 1H), 3.07 (dd, *J* = 17.4, 7.2 Hz, 1H), 2.79 (dd, *J* = 17.4, 6.6 Hz, 1H), 1.28 (t, *J* = 7.2 Hz, 3H); <sup>13</sup>C NMR (150 MHz, CDCl<sub>3</sub>): δ (ppm) 170.6, 149.3, 148.9, 147.9, 140.4, 125.7, 125.5, 121.1, 119.0, 111.4, 90.5, 70.5, 61.5, 54.4, 49.6, 38.7, 14.1; HRMS (ESI-TOF) *m/z*: [M + Na]<sup>+</sup> Calcd. for C<sub>17</sub>H<sub>16</sub>N<sub>2</sub>O<sub>5</sub>Na<sup>+</sup> 351.0951, found 351.0954.

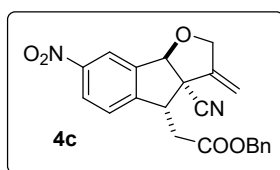

**Synthesis of 4c by general procedure B:** An oven-dried 5 mL test-tube equipped with a septum and a magnetic stir bar was charged with benzyl (*E*)-3-(2-formyl-4-nitrophenyl)acrylate **1c** (31.1 mg, 0.100 mmol, 1.0 equiv), Pd(PPh<sub>3</sub>)<sub>4</sub> (5.8 mg, 0.0050 mmol, 5 mol %) and **C6** (9.6 mg, 0.020 mmol, 20 mol %). The tube was capped, evacuated and back-filled with nitrogen for three times. Then degassed anhydrous mesitylene (2.0 mL) and TMM donor **2a** (27.6 mg, 0.140 mmol, 1.4 equiv) were added via syringe in sequence, and the tube was evacuated and back-filled with nitrogen for three times again. The resulting mixture was stirred at 10 °C for 5 h, and monitored by TLC (petroleum ether/EtOAc = 6/1). After completion, the solvent was evaporated in vacuo. Purification by flash chromatography on silica gel (petroleum ether/EtOAc = 10/1) gave the product **4c**: 36.6 mg, 94% yield, >20:1 dr, as a colorless oil; <sup>1</sup>H NMR (600 MHz, CDCl<sub>3</sub>): δ (ppm) 8.24 (s, 1H), 8.14 (dd, *J* = 8.4, 1.8 Hz, 1H), 7.37–7.32 (m, 5H), 7.29 (d, *J* = 8.4 Hz, 1H), 5.97 (s, 1H), 5.61 (s, 1H), 5.32 (s, 1H), 5.17 (dd, *J* = 32.4, 12.0 Hz, 2H), 4.63 (d, *J* = 13.2 Hz, 1H), 4.10 (d, *J* = 13.8 Hz, 1H), 4.05 (t, *J* = 6.6 Hz, 1H), 3.12 (dd, *J* = 16.8, 6.6 Hz, 1H), 2.84 (dd, *J* = 17.4, 7.2 Hz, 1H); <sup>13</sup>C NMR (150 MHz, CDCl<sub>3</sub>): δ (ppm) 170.3, 149.0, 148.8, 147.9, 140.3, 135.1, 128.7, 128.7, 125.7, 125.5, 121.1, 119.0, 111.4, 90.4, 70.5, 67.3, 54.4, 49.6, 38.7; HRMS (ESI-TOF) *m/z*: [M + Na]<sup>+</sup> Calcd. for C<sub>22</sub>H<sub>18</sub>N<sub>2</sub>O<sub>5</sub>Na<sup>+</sup> 413.1108, found 413.1116.

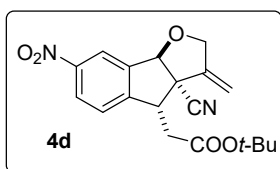

**Synthesis of 4d by general procedure B:** An oven-dried 5 mL test-tube equipped with a septum and a magnetic stir bar was charged with *tert*-butyl (*E*)-3-(2-formyl-4-nitrophenyl)acrylate **1d** (27.7 mg, 0.100 mmol, 1.0

equiv), Pd(PPh<sub>3</sub>)<sub>4</sub> (5.8 mg, 0.0050 mmol, 5 mol %) and **C6** (9.6 mg, 0.020 mmol, 20 mol %). The tube was capped, evacuated and back-filled with nitrogen for three times. Then degassed anhydrous mesitylene (2.0 mL) and TMM donor **2a** (27.6 mg, 0.140 mmol, 1.4 equiv) were added via syringe in sequence, and the tube was evacuated and back-filled with nitrogen for three times again. The resulting mixture was stirred at 10 °C for 5 h, and monitored by TLC (petroleum ether/EtOAc = 6/1). After completion, the solvent was evaporated in vacuo. Purification by flash chromatography on silica gel (petroleum ether/EtOAc = 10/1) gave the product **4d**: 29.2 mg, 82% yield, >20:1 dr, as a colorless oil; <sup>1</sup>H NMR (600 MHz, CDCl<sub>3</sub>): δ (ppm) 8.28 (s, 1H), 8.22 (dd, *J* = 8.4, 1.8 Hz, 1H), 7.41 (d, *J* = 8.4 Hz, 1H), 5.98 (s, 1H), 5.67 (s, 1H), 5.33 (s, 1H), 4.64 (dt, *J* = 13.2, 2.4 Hz, 1H), 4.13 (dt, *J* = 13.8, 2.4 Hz, 1H), 4.04 (t, *J* = 6.9 Hz, 1H), 2.99 (dd, *J* = 16.8, 6.6 Hz, 1H), 2.69 (dd, *J* = 17.4, 7.2 Hz, 1H), 1.48 (s, 9H); <sup>13</sup>C NMR (150 MHz, CDCl<sub>3</sub>): δ (ppm) 169.8, 149.7, 148.8, 148.0, 140.3, 125.7, 125.4, 121.0, 119.1, 111.4, 90.5, 82.2, 70.5, 54.4, 49.7, 39.9, 28.1; HRMS (ESI-TOF) *m/z*: [M + Na]<sup>+</sup> Calcd. for C<sub>19</sub>H<sub>20</sub>N<sub>2</sub>O<sub>5</sub>Na<sup>+</sup> 379.1264, found 379.1270.

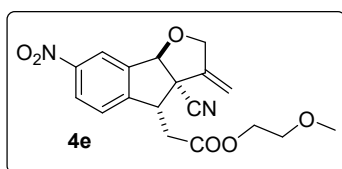

**Synthesis of 4e by general procedure B:** An oven-dried 5 mL test-tube equipped with a septum and a magnetic stir bar was charged with 2-methoxyethyl (*Z*)-3-(2-formyl-4-nitrophenyl)acrylate **1e** (27.9 mg, 0.100 mmol, 1.0 equiv), Pd(PPh<sub>3</sub>)<sub>4</sub> (5.8 mg, 0.0050 mmol, 5 mol %)

and **C6** (9.6 mg, 0.020 mmol, 20 mol %). The tube was capped, evacuated and back-filled with nitrogen for three times. Then degassed anhydrous mesitylene (2.0 mL) and TMM donor **2a** (27.6 mg, 0.140 mmol, 1.4 equiv) were added via syringe in sequence, and the tube was evacuated and back-filled with nitrogen for three times again. The resulting mixture was stirred at 10 °C for 5 h, and monitored by TLC (petroleum ether/EtOAc = 6/1). After completion, the solvent was evaporated in vacuo. Purification by flash chromatography on silica gel (petroleum ether/EtOAc = 10/1) gave the product **4e**: 31.9 mg, 89% yield, >20:1 dr, as a colorless oil; <sup>1</sup>H NMR (600 MHz, CDCl<sub>3</sub>): δ (ppm) 8.21 (d, *J* = 2.4 Hz, 1H), 8.15 (dd, *J* = 8.4, 2.4 Hz, 1H), 7.35 (d, *J* = 8.4 Hz, 1H), 5.95 (s, 1H), 5.68–5.50 (m, 1H), 5.34–5.21 (m, 1H), 4.57 (dt, *J* = 13.8, 2.4 Hz, 1H), 4.27–4.19 (m, 2H), 4.05 (dt, *J* = 13.8, 2.4 Hz, 1H), 4.00 (t, *J* = 6.6 Hz, 1H), 3.59–3.45 (m, 2H), 3.31 (s, 3H), 3.05 (dd, *J* = 17.4, 7.2 Hz, 1H), 2.79 (dd, *J* = 17.4, 7.2 Hz, 1H); <sup>13</sup>C NMR (150 MHz, CDCl<sub>3</sub>): δ (ppm) 170.5, 149.1, 148.9, 147.9, 140.4, 125.8, 125.5, 121.1, 119.0, 111.4, 90.4, 70.5, 70.2, 64.3, 59.0, 54.4, 49.6, 38.6; HRMS (ESI-TOF) *m/z*: [M + Na]<sup>+</sup> Calcd. for C<sub>18</sub>H<sub>18</sub>N<sub>2</sub>O<sub>6</sub>Na<sup>+</sup> 381.1057, found 381.1065.

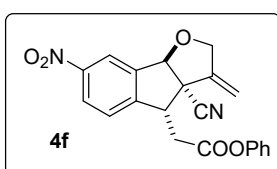

**Synthesis of 4f by general procedure B:** An oven-dried 5 mL test-tube equipped with a septum and a magnetic stir bar was charged with 2-phenyl (*Z*)-3-(2-formyl-4-nitrophenyl)acrylate **1f** (29.7 mg, 0.100 mmol, 1.0 equiv),



---

Pd(PPh<sub>3</sub>)<sub>4</sub> (5.8 mg, 0.0050 mmol, 5 mol %) and **C6** (9.6 mg, 0.020 mmol, 20 mol %). The tube was capped, evacuated and back-filled with nitrogen for three times. Then degassed anhydrous mesitylene (2.0 mL) and TMM donor **2a** (27.6 mg, 0.140 mmol, 1.4 equiv) were added via syringe in sequence, and the tube was evacuated and back-filled with nitrogen for three times again. The resulting mixture was stirred at 10 °C for 24 h, and monitored by TLC (petroleum ether/EtOAc = 6/1). After completion, the solvent was evaporated in vacuo. Purification by flash chromatography on silica gel (petroleum ether/EtOAc = 10/1) gave the product **4f**: 27.0 mg, 72% yield, >20:1 dr, as a yellow oil; <sup>1</sup>H NMR (600 MHz, CDCl<sub>3</sub>): δ (ppm) 8.30 (s, 1H), 8.26 (dd, *J* = 8.4, 1.8 Hz, 1H), 7.47 (d, *J* = 8.4 Hz, 1H), 7.40 (t, *J* = 7.8 Hz, 2H), 7.29–7.24 (m, 1H), 7.10 (d, *J* = 7.8 Hz, 2H), 6.08 (s, 1H), 5.70 (d, *J* = 1.8 Hz, 1H), 5.35 (d, *J* = 1.8 Hz, 1H), 4.65 (dt, *J* = 13.8, 1.8 Hz, 1H), 4.16 (t, *J* = 6.6 Hz, 1H), 4.12 (dt, *J* = 13.8, 2.4 Hz, 1H), 3.31 (dd, *J* = 17.4, 7.2 Hz, 1H), 3.11 (dd, *J* = 17.4, 6.0 Hz, 1H); <sup>13</sup>C NMR (150 MHz, CDCl<sub>3</sub>): δ (ppm) 169.5, 150.3, 149.0, 148.8, 147.9, 140.6, 129.7, 126.4, 125.7, 125.6, 121.4, 121.2, 119.2, 111.7, 90.6, 70.4, 54.2, 49.9, 38.9; HRMS (ESI-TOF) *m/z*: [M + Na]<sup>+</sup> Calcd. for C<sub>21</sub>H<sub>16</sub>N<sub>2</sub>O<sub>5</sub>Na<sup>+</sup> 399.0951, found 399.0954.

## 5. General procedure for synthesis of cycloadducts 6a–f

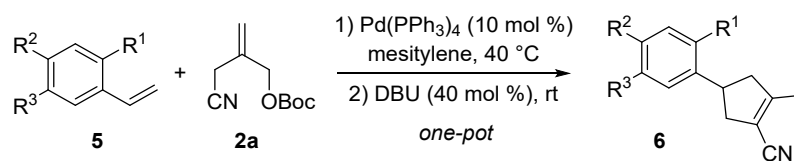

**General procedure C:** An oven-dried 5 mL test-tube equipped with a septum and a magnetic stir bar was charged with substituted styrene **5** (0.10 mmol, 1.0 equiv) and Pd(PPh<sub>3</sub>)<sub>4</sub> (11.6 mg, 0.0100 mmol, 10 mol %). The tube was capped, evacuated and back-filled with nitrogen for three times. Then degassed anhydrous mesitylene (1.0 mL) and TMM donor **2a** (39.4 mg, 0.20 mmol, 2.0 equiv) were added via syringe in sequence, and the tube was evacuated and back-filled with nitrogen for three times again. The resulting mixture was stirred at 40 °C for 10 h, and monitored by TLC (petroleum ether/EtOAc = 6/1). After completion, the mixture was cooled to room temperature, and DBU (6.0 μL, 0.039 mmol, 40 mol %) was directly added and stirred for 10 min, and monitored by TLC (petroleum ether/EtOAc = 6/1). After completion, purification by flash chromatography on silica gel (petroleum ether/EtOAc = 10/1) gave the product **6a–f**.

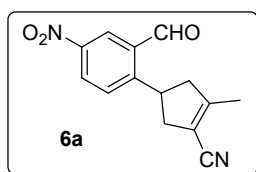

**Synthesis of 6a by general procedure C:** An oven-dried 5 mL test-tube equipped with a septum and a magnetic stir bar was charged with 5-nitro-2-vinylbenzaldehyde **5a** (17.7 mg, 0.100 mmol, 1.0 equiv) and Pd(PPh<sub>3</sub>)<sub>4</sub> (11.6 mg, 0.0100 mmol, 10 mol %). The tube was capped, evacuated and back-filled

with nitrogen for three times. Then degassed anhydrous mesitylene (1.0 mL) and TMM donor **2a** (39.4 mg, 0.200 mmol, 2.0 equiv) were added via syringe in sequence, and the tube was evacuated and back-filled with nitrogen for three times again. The resulting mixture was stirred at 40 °C for 10 h, and monitored by TLC (petroleum ether/EtOAc = 6/1). After full conversion, the mixture was cooled to room temperature, and DBU (6.0 μL, 0.039 mmol, 40 mol %) was directly added and stirred for 10 min, monitored by TLC (petroleum ether/EtOAc = 6/1). After completion, purification by flash chromatography on silica gel (petroleum ether/EtOAc = 10/1) gave the product **6a**: 24.3 mg, 95% yield, as a colorless oil; <sup>1</sup>H NMR (600 MHz, CDCl<sub>3</sub>): δ (ppm) 10.27 (s, 1H), 8.66 (d, *J* = 2.4 Hz, 1H), 8.41 (dd, *J* = 8.4, 2.4 Hz, 1H), 7.59 (d, *J* = 8.4 Hz, 1H), 4.78–4.56 (m, 1H), 3.25–3.14 (m, 1H), 3.10 (dd, *J* = 18.6, 9.6 Hz, 1H), 2.80–2.66 (m, 1H), 2.62–2.48 (m, 1H), 2.08 (s, 3H); <sup>13</sup>C NMR (150 MHz, CDCl<sub>3</sub>): δ (ppm) 190.6, 159.2, 153.7, 146.9, 134.2, 128.6, 128.5, 128.3, 116.0, 107.4, 46.0, 41.7, 36.9, 16.6; HRMS (ESI-TOF) *m/z*: [M + Na]<sup>+</sup> Calcd. for C<sub>14</sub>H<sub>12</sub>O<sub>2</sub>N<sub>3</sub>Na<sup>+</sup> 279.0740, found 279.0750.

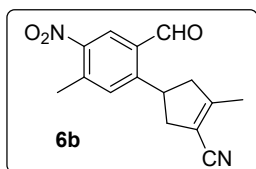

**Synthesis of 6b by general procedure C:** An oven-dried 5 mL test-tube equipped with a septum and a magnetic stir bar was charged with 4-methyl-5-nitro-2-vinylbenzaldehyde **5b** (19.1 mg, 0.100 mmol, 1.0 equiv) and Pd(PPh<sub>3</sub>)<sub>4</sub> (11.6 mg, 0.0100 mmol, 10 mol %). The tube was capped, evacuated and back-

filled with nitrogen for three times. Then degassed anhydrous mesitylene (1.0 mL) and TMM donor **2a** (39.4 mg, 0.200 mmol, 2.0 equiv) were added via syringe in sequence, and the tube was evacuated and back-filled with nitrogen for three times again. The resulting mixture was stirred at 40 °C for 10 h, and monitored by TLC (petroleum ether/EtOAc = 6/1). After full conversion, the mixture was cooled to room temperature, and DBU (6.0 μL, 0.039 mmol, 40 mol %) was directly added and stirred for 10 min, monitored by TLC (petroleum ether/EtOAc = 6/1). After completion, purification by flash chromatography on silica gel (petroleum ether/EtOAc = 10/1) gave the product **6b**: 18.6 mg, 69% yield, as a colorless oil; <sup>1</sup>H NMR (600 MHz, CDCl<sub>3</sub>): δ (ppm) 10.17 (s, 1H), 8.45 (s, 1H), 7.33 (s, 1H), 4.75–4.60 (m, 1H), 3.21–3.11 (m, 1H), 3.06 (dd, *J* = 18.6, 9.0 Hz, 1H), 2.77–2.72 (m, 1H), 2.71 (s, 3H), 2.57–2.47 (m, 1H), 2.08 (s, 3H); <sup>13</sup>C NMR (150 MHz, CDCl<sub>3</sub>): δ (ppm) 190.4, 159.3, 151.5, 147.6, 140.2, 132.3, 132.1, 130.6, 116.1, 107.4, 45.9, 41.5, 36.7, 21.3, 16.6; HRMS (ESI-TOF) *m/z*: [M + Na]<sup>+</sup> Calcd. for C<sub>15</sub>H<sub>14</sub>O<sub>2</sub>N<sub>3</sub>Na<sup>+</sup> 293.0897, found 293.0910.

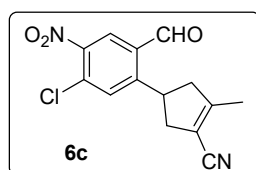

**Synthesis of 6c by general procedure C:** An oven-dried 5 mL test-tube equipped with a septum and a magnetic stir bar was charged with 4-chloro-5-nitro-2-vinylbenzaldehyde **5c** (21.1 mg, 0.100 mmol, 1.0 equiv) and Pd(PPh<sub>3</sub>)<sub>4</sub> (11.6 mg, 0.0100 mmol, 10 mol %). The tube was capped, evacuated and back-

filled with nitrogen for three times. Then degassed anhydrous mesitylene (1.0 mL) and TMM donor **2a** (39.4 mg, 0.200 mmol, 2.0 equiv) were added via syringe in sequence, and the tube was evacuated and back-filled with nitrogen for three times again. The resulting mixture was stirred at 40 °C for 10 h, and monitored by TLC (petroleum ether/EtOAc = 6/1). After full conversion, the mixture was cooled to room temperature, and DBU (6.0 μL, 0.039 mmol, 40 mol %) was directly added and stirred for 10 min, monitored by TLC (petroleum ether/EtOAc = 6/1). After completion, purification by flash chromatography on silica gel (petroleum ether/EtOAc = 10/1) gave the product **6c**: 24.5 mg, 84% yield, as a colorless oil; <sup>1</sup>H NMR (600 MHz, CDCl<sub>3</sub>): δ (ppm) 10.18 (s, 1H), 8.38 (s, 1H), 7.54 (s, 1H), 4.71–4.60 (m, 1H), 3.21–3.14 (m, 1H), 3.08 (dd, *J* = 18.6, 9.6 Hz, 1H), 2.76–2.68 (m, 1H), 2.60–2.50 (m, 1H), 2.09 (s, 3H); <sup>13</sup>C NMR (150 MHz, CDCl<sub>3</sub>): δ (ppm) 189.3, 159.1, 152.1, 133.3, 132.5, 131.3, 130.8, 115.8, 107.4, 78.9, 45.7, 41.5, 36.6, 16.6; HRMS (ESI-TOF) *m/z*: [M + Na]<sup>+</sup> Calcd. for C<sub>14</sub>H<sub>11</sub><sup>35</sup>ClO<sub>2</sub>N<sub>3</sub>Na<sup>+</sup> 313.0351, found 313.0359; Calcd. for C<sub>14</sub>H<sub>11</sub><sup>37</sup>ClO<sub>2</sub>N<sub>3</sub>Na<sup>+</sup> 315.0321, found 315.0342.

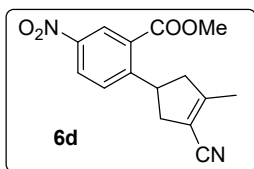

**Synthesis of 6d by general procedure C:** An oven-dried 5 mL test-tube equipped with a septum and a magnetic stir bar was charged with methyl 5-nitro-2-vinylbenzoate **5d** (20.7 mg, 0.100 mmol, 1.0 equiv) and Pd(PPh<sub>3</sub>)<sub>4</sub> (11.6 mg, 0.0100 mmol, 10 mol %). The tube was capped, evacuated and back-

filled with nitrogen for three times. Then degassed anhydrous mesitylene (1.0 mL) and TMM donor **2a** (39.4 mg, 0.200 mmol, 2.0 equiv) were added via syringe in sequence, and the tube was evacuated and back-filled with nitrogen for three times again. The resulting mixture was stirred at 40 °C for 10 h, and monitored by TLC (petroleum ether/EtOAc = 6/1). After full conversion, the mixture was cooled to room temperature, and DBU (6.0 μL, 0.039 mmol, 40 mol %) was directly added and stirred for 10 min, monitored by TLC (petroleum ether/EtOAc = 6/1). After completion, purification by flash chromatography on silica gel (petroleum ether/EtOAc = 10/1) gave the product **6d**: 24.3 mg, 85% yield, as a colorless oil; <sup>1</sup>H NMR (600 MHz, CDCl<sub>3</sub>): δ (ppm) 8.69 (d, *J* = 2.4 Hz, 1H), 8.32 (dd, *J* = 9.0, 2.4 Hz, 1H), 7.53 (d, *J* = 8.4 Hz, 1H), 4.68–4.48 (m, 1H), 3.97 (s, 3H), 3.26–3.11 (m, 1H), 3.07 (dd, *J* = 18.0, 9.0 Hz, 1H), 2.77–2.67 (m, 1H), 2.63–2.48 (m, 1H), 2.07 (s, 3H); <sup>13</sup>C NMR (150 MHz, CDCl<sub>3</sub>): δ (ppm) 166.1, 159.4, 153.6, 146.1, 130.9, 128.2, 126.8, 125.7, 116.1, 107.5, 52.9, 46.5, 42.3, 38.1, 16.6; HRMS (ESI-TOF) *m/z*: [M + Na]<sup>+</sup> Calcd. for C<sub>15</sub>H<sub>14</sub>N<sub>2</sub>O<sub>4</sub>Na<sup>+</sup> 309.0846, found 309.0852.

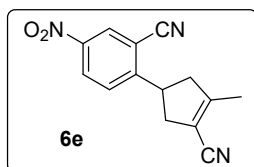

**Synthesis of 6e by general procedure C:** An oven-dried 5 mL test-tube equipped with a septum and a magnetic stir bar was charged with 5-nitro-2-vinylbenzonitrile **5e** (17.4 mg, 0.100 mmol, 1.0 equiv) and Pd(PPh<sub>3</sub>)<sub>4</sub> (11.6 mg, 0.0100 mmol, 10 mol %). The tube was capped, evacuated and back-filled

with nitrogen for three times. Then degassed anhydrous mesitylene (1.0 mL) and TMM donor **2a** (39.4 mg, 0.200 mmol, 2.0 equiv) were added via syringe in sequence, and the tube was evacuated and back-filled with nitrogen for three times again. The resulting mixture was stirred at 40 °C for 10 h, and monitored by TLC (petroleum ether/EtOAc = 6/1). After full conversion, the mixture was cooled to room temperature, and DBU (6.0 μL, 0.039 mmol, 40 mol %) was directly added and stirred for 10 min, monitored by TLC (petroleum ether/EtOAc = 6/1). After completion, purification by flash chromatography on silica gel (petroleum ether/EtOAc = 10/1) gave the product **6e**: 24.7 mg, 98% yield, as a colorless oil; <sup>1</sup>H NMR (600 MHz, CDCl<sub>3</sub>): δ (ppm) 8.52 (d, *J* = 2.4 Hz, 1H), 8.43 (dd, *J* = 9.0, 2.4 Hz, 1H), 7.59 (d, *J* = 9.0 Hz, 1H), 4.19–4.09 (m, 1H), 3.30–3.19 (m, 1H), 3.19–3.10 (m, 1H), 2.84–2.69 (m, 1H), 2.65–2.55 (m, 1H), 2.10 (s, 3H); <sup>13</sup>C NMR (150 MHz, CDCl<sub>3</sub>): δ (ppm) 158.9, 155.3, 146.6, 128.2, 128.1, 128.0, 115.7, 115.6, 113.6, 107.4, 45.6, 41.5, 40.4, 16.6; HRMS (ESI-TOF) *m/z*: [M + Na]<sup>+</sup> Calcd. for C<sub>14</sub>H<sub>11</sub>N<sub>3</sub>O<sub>2</sub>Na<sup>+</sup> 276.0743, found 276.0744.

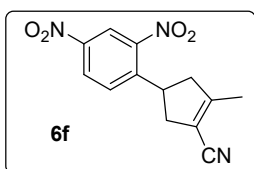

**Synthesis of 6f by general procedure C:** An oven-dried 5 mL test-tube equipped with a septum and a magnetic stir bar was charged with 2,4-dinitro-1-vinylbenzene **5f** (19.4 mg, 0.100 mmol, 1.0 equiv) and Pd(PPh<sub>3</sub>)<sub>4</sub> (11.6 mg, 0.0100 mmol, 10 mol %). The tube was capped, evacuated and back-filled

with nitrogen for three times. Then degassed anhydrous mesitylene (1.0 mL) and TMM donor **2a** (39.4 mg, 0.200 mmol, 2.0 equiv) were added via syringe in sequence, and the tube was evacuated and back-filled with nitrogen for three times again. The resulting mixture was stirred at 40 °C for 10 h, and monitored by TLC (petroleum ether/EtOAc = 6/1). After full conversion, the mixture was cooled to room temperature, and DBU (6.0 μL, 0.039 mmol, 40 mol %) was directly added and stirred for 10 min, monitored by TLC (petroleum ether/EtOAc = 6/1). After completion, purification by flash chromatography on silica gel (petroleum ether/EtOAc = 10/1) gave the product **6f**: 26.2 mg, 96% yield, as a colorless oil; <sup>1</sup>H NMR (600 MHz, CDCl<sub>3</sub>): δ (ppm) 8.67 (d, *J* = 2.4 Hz, 1H), 8.43 (dd, *J* = 9.0, 2.4 Hz, 1H), 7.63 (d, *J* = 8.4 Hz, 1H), 4.19–4.04 (m, 1H), 3.26–3.19 (m, 1H), 3.14 (dd, *J* = 18.6, 9.6 Hz, 1H), 2.89–2.69 (m, 1H), 2.69–2.54 (m, 1H), 2.09 (s, 3H); <sup>13</sup>C NMR (150 MHz, CDCl<sub>3</sub>): δ (ppm) 159.0, 149.5, 146.5, 146.2, 129.4, 127.4, 119.9, 115.7, 107.4, 46.2, 42.0, 37.0, 16.6; HRMS (ESI-TOF) *m/z*: [M + H]<sup>+</sup> Calcd. for C<sub>13</sub>H<sub>12</sub>N<sub>3</sub>O<sub>4</sub><sup>+</sup> 274.0822, found 274.0828.

## 6. Synthesis of cycloadducts **3f** on a 1.0 mmol scale

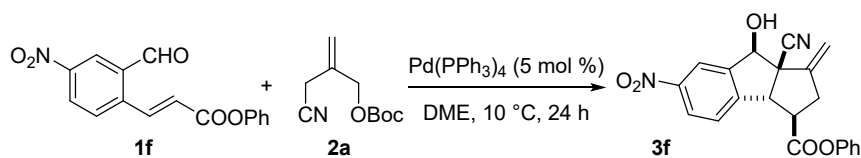

An oven-dried 50 mL sealed tube equipped with a septum and a magnetic stir bar was charged with 2-phenyl (*Z*)-3-(2-formyl-4-nitrophenyl)acrylate **1f** (297.0 mg, 1.000 mmol, 1.0 equiv) and  $\text{Pd}(\text{PPh}_3)_4$  (58.0 mg, 0.0500 mmol, 5 mol %). The tube was capped, evacuated and back-filled with nitrogen for three times. Then degassed anhydrous DME (10.0 mL) and TMM donor **2a** (236.0 mg, 1.200 mmol, 1.2 equiv) were added via syringe in sequence, and the tube was evacuated and back-filled with nitrogen for three times again. The resulting mixture was stirred at 10 °C for 24 h, and monitored by TLC (petroleum ether/EtOAc = 6/1). After completion, the solvent was evaporated in vacuo. Purification by flash chromatography on silica gel (petroleum ether/EtOAc = 10/1) gave the product **3f**: 308.4 mg, 82% yield, >20:1 dr, as a colorless oil.

## 7. Synthesis of cycloadducts **4f** on a 1.0 mmol scale

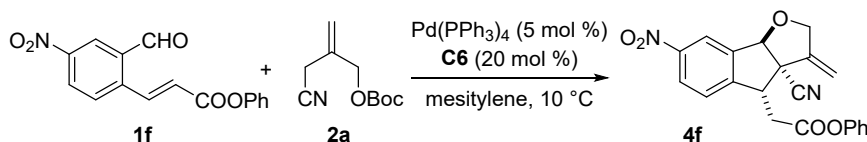

An oven-dried 50 mL sealed tube equipped with a septum and a magnetic stir bar was charged with 2-phenyl (*Z*)-3-(2-formyl-4-nitrophenyl)acrylate **1f** (297.0 mg, 1.000 mmol, 1.0 equiv),  $\text{Pd}(\text{PPh}_3)_4$  (58.0 mg, 0.0500 mmol, 5 mol %) and **C6** (96.0 mg, 0.200 mmol, 20 mol %). The tube was capped, evacuated and back-filled with nitrogen for three times. Then degassed anhydrous mesitylene (20.0 mL) and TMM donor **2a** (276.0 mg, 1.400 mmol, 1.4 equiv) were added via syringe in sequence, and the tube was evacuated and back-filled with nitrogen for three times again. The resulting mixture was stirred at 10 °C for 48 h, and monitored by TLC (petroleum ether/EtOAc = 6/1). After completion, the solvent was evaporated in vacuo. Purification by flash chromatography on silica gel (petroleum ether/EtOAc = 10/1) gave the product **4f**: 270.7 mg, 64% yield, >20:1 dr, as a yellow oil.

## 8. More substrate attempts

In order to further expand the substrate scope, (*Z*)-formyl cinnamate, more dielectrophiles, TMM donors and aryl ethylenes were investigated under the standard or optimal conditions.

### More investigations in C=C selective [3+2] / aldol reaction

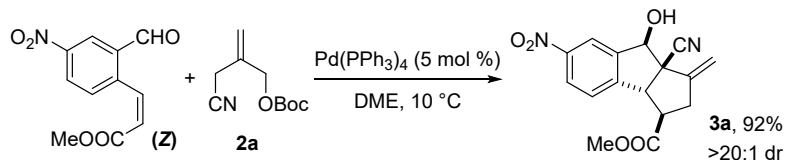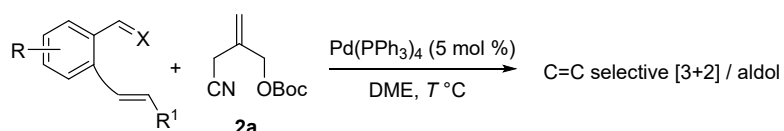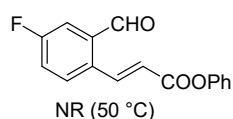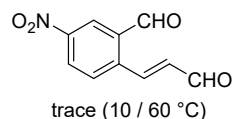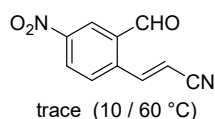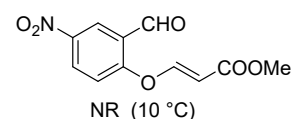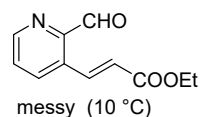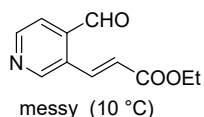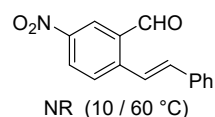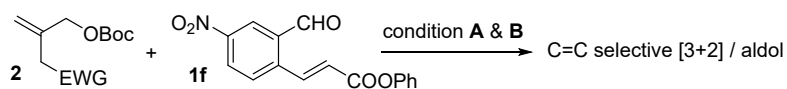

condition A:  $\text{Pd}(\text{PPh}_3)_4$  (5 mol %), DME,  $10^\circ\text{C}$ ;

condition B:  $\text{Pd}(\text{PPh}_3)_4$  (5 mol %), DME,  $60^\circ\text{C}$ .

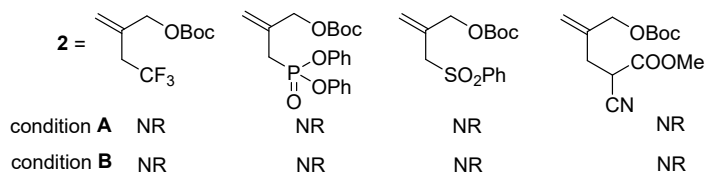

More investigations in C=O selective [3+2] / Michael reaction

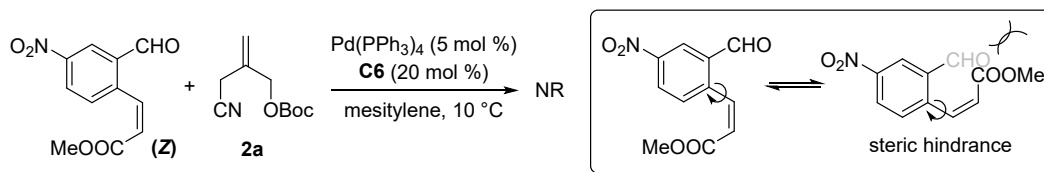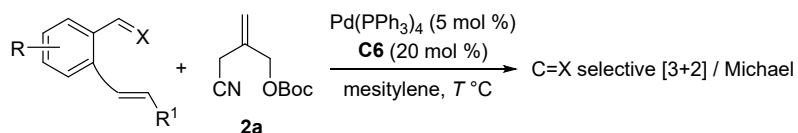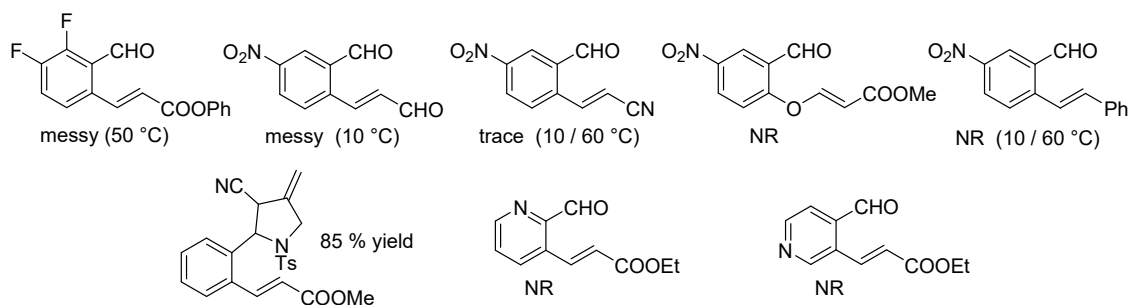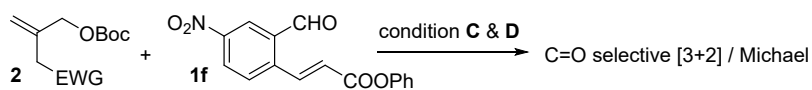

condition **C**: Pd(PPh<sub>3</sub>)<sub>4</sub> (5 mol %), **C6** (20 mol %), mesitylene, 10 °C;

condition **D**: Pd(PPh<sub>3</sub>)<sub>4</sub> (5 mol %), **C6** (20 mol %), mesitylene, 60 °C.

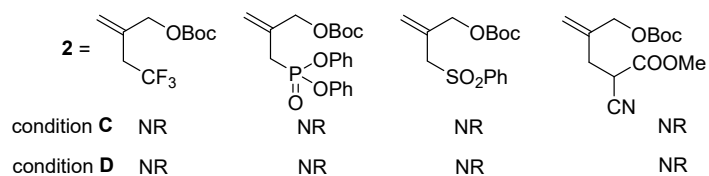



**More investigations in cascade cycloadditions for dielectrophilies**

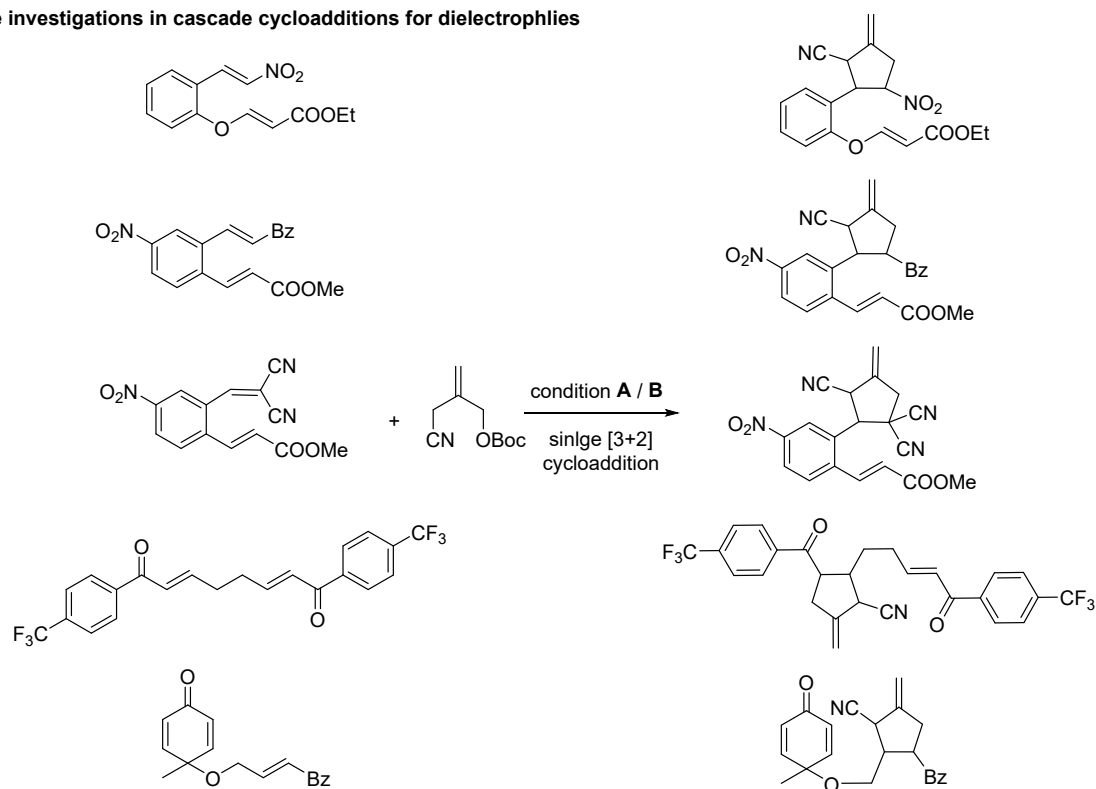

**More investigations in Pd-TMM cycloadditions for aryl-substituted alkenes**

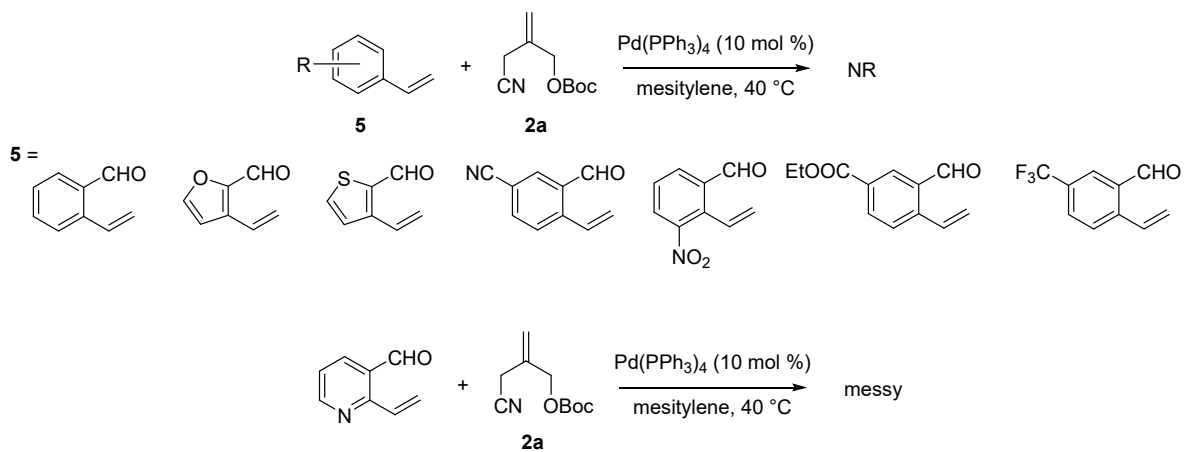

## 9. Asymmetric explorations

Great efforts have been devoted to investigating the asymmetric version of the cascade reactions. Unfortunately, there was barely enantiocontrol afforded employing commonly used chiral phosphines.

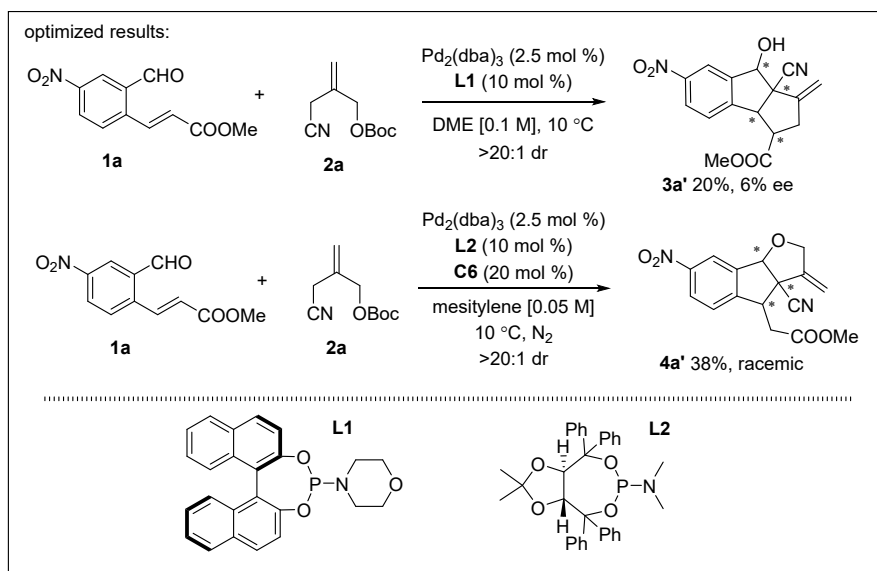

## 10. Crystal data and structural refinement

Procedure for the recrystallization of **3a**: To a 10 mL tube containing **3a** (20 mg) was added  $\text{CHCl}_3$  (3.0 mL), which was kept aside overnight at room temperature to obtain crystals. The crystals were subjected for single crystal XRD to determine the configuration of **3a** (CCDC 2283650)

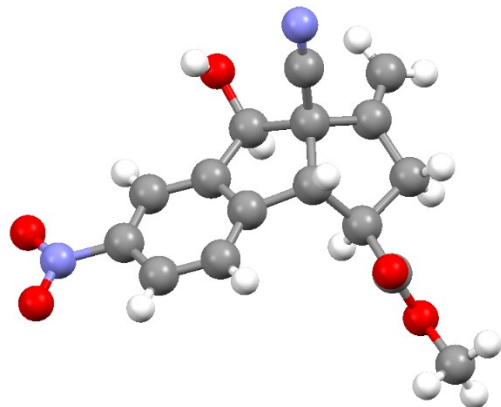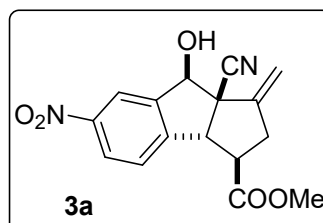

|                                 |                                                                  |                  |
|---------------------------------|------------------------------------------------------------------|------------------|
| Identification code             | <b>3a</b>                                                        |                  |
| Empirical formula               | $\text{C}_{16}\text{H}_{14}\text{N}_2\text{O}_5$                 |                  |
| Formula weight                  | 314.29                                                           |                  |
| Temperature                     | 273 K                                                            |                  |
| Wavelength                      | 1.54178                                                          |                  |
| Crystal system                  | Triclinic                                                        |                  |
| Space group                     | P-1                                                              |                  |
| Unit cell dimensions            | $a = 8.2559(10)$                                                 | $a = 90.558(7)$  |
|                                 | $b = 8.4217(11)$                                                 | $b = 110.791(7)$ |
|                                 | $c = 11.5815(15)$                                                | $g = 98.454(7)$  |
| Volume                          | 742.96(17)                                                       |                  |
| Z                               | 2                                                                |                  |
| Density (calculated)            | 1.405 $\text{g}/\text{cm}^3$                                     |                  |
| Absorption coefficient          | 0.892 $\text{mm}^{-1}$                                           |                  |
| F(000)                          | 328                                                              |                  |
| Crystal size                    | 0.220 x 0.200 x 0.180 $\text{mm}^3$                              |                  |
| Theta range for data collection | 5.322 to 67.136                                                  |                  |
| Index ranges                    | $-9 \leq h \leq 9$ , $-10 \leq k \leq 10$ , $-13 \leq l \leq 13$ |                  |
| Reflections collected           | 7925                                                             |                  |
| Independent reflections         | 2548 [R(int) = 0.0458]                                           |                  |
| Completeness to theta = 67.136  | 96.3 %                                                           |                  |
| Absorption correction           | None                                                             |                  |
| Refinement method               | Full-matrix least-squares on $F^2$                               |                  |

---

|                                      |                                  |
|--------------------------------------|----------------------------------|
| Data / restraints / parameters       | 2548/0/210                       |
| Goodness-of-fit on $F^2$             | 1.007                            |
| Final R indices [ $I > 2\sigma(I)$ ] | $R_1 = 0.0766$ , $wR_2 = 0.2154$ |
| R indices (all data)                 | $R_1 = 0.0952$ , $wR_2 = 0.2378$ |
| Extinction coefficient               | n/a                              |
| Largest diff. peak and hole          | 0.448 and -0.396                 |

## 11. Mechanism study

All structures were fully optimized using B3LYP functional in Gaussian16 [4]. Standard 6-31g(d) basis sets (The C=O-selective [3+2] cycloadditions in DME have been investigated at 6-311G(d,p)) were applied for the atoms except phosphorus (P) and palladium (Pd), which was described by relativistic effective core potential (ECP). Phosphorus and palladium were modified by Lanl2dz basis set, in which the secondary outer p functions of the standard Lanl2dz basis set were replaced with optimized ones and an *f* polarization function was added [5]. Normal coordinate analysis of each stationary point was performed to confirm whether the optimized geometry was a minima or a transition state, and to calculate zero-point energy and Gibbs free energy. Natural bond orbital (NBO) [6,7] calculations were performed to analyze how the charge distributes in the bonding and how it transfers in the reaction. In each elementary step, intrinsic reaction coordinate (IRC) [8] calculation was used to verify whether each TS connects the reactant and the product. The effect of solvent (DME) environment on catalytic process was evaluated using the solvation model based on density (SMD) [9] with its dielectric constant of 38.3. The free energy of each species in solution was deemed as the sum of the gas-phase free energy and the free energy of solvation.

### 11.1 C=O- and C=C-selectivity [3+2] cycloaddition in DME

To elucidate high C=O selectivity for the [3+2] cycloaddition in DME, density functional theory (DFT) calculations were conducted. As depicted in the Scheme below, two pathways were proposed and calculated, including C=O selective addition (green line) and C=C selective addition (blue line).

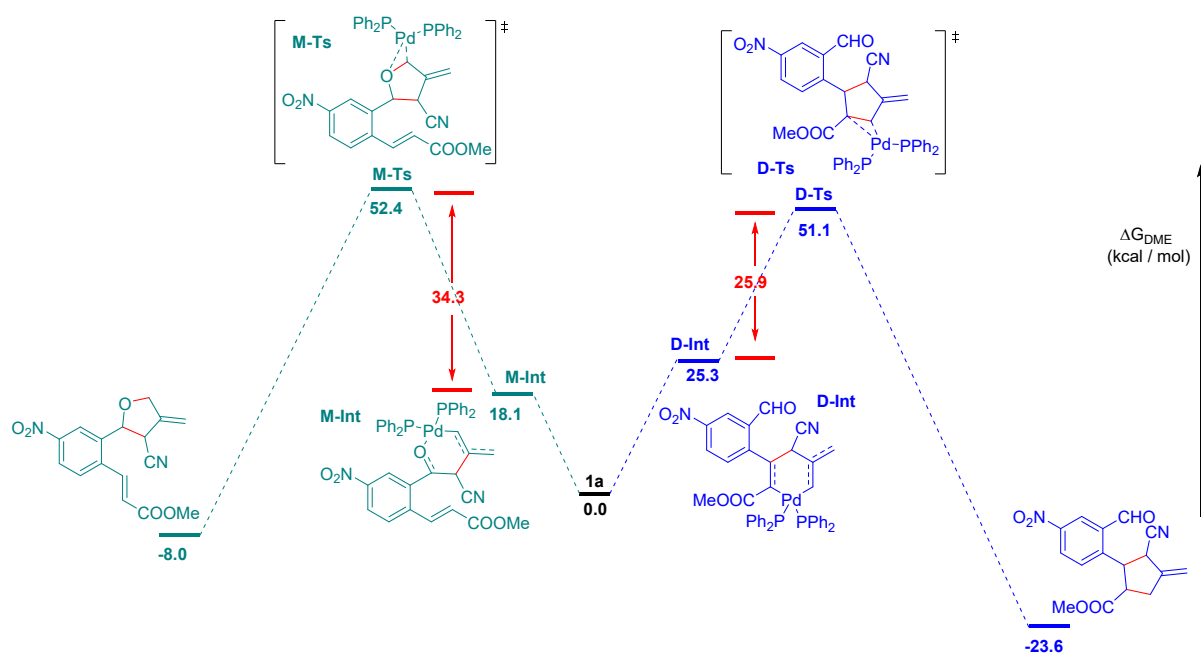

The energy barrier for the C=O-selective [3+2] process from **1a** to **M-Ts** is 52.4 kcal mol<sup>-1</sup>, in

C=C-selective process, from **1a** to **D-Ts** is 51.1 kcal mol<sup>-1</sup>. In addition, a lower free energy (25.9 kcal mol<sup>-1</sup> vs 34.3 kcal mol<sup>-1</sup>) was observed via **D-Int** to form **D-Ts**. These results demonstrate that the C=O [3+2] process is more favorable in the solvent.

## 11.2 NBO charge analysis of the substrates and intermediates

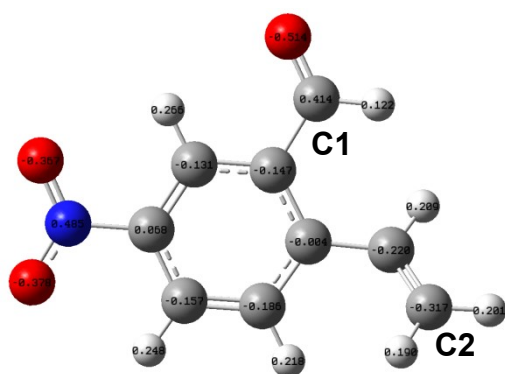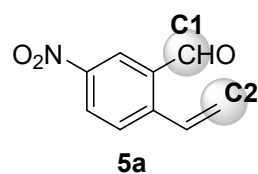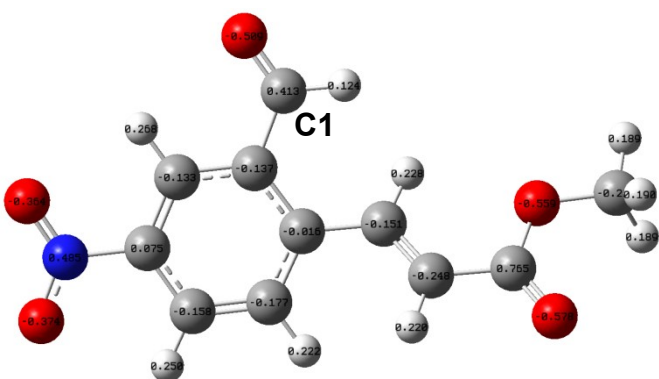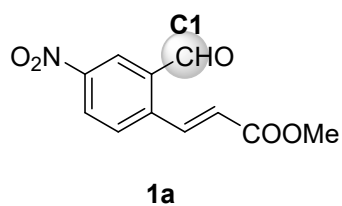



---

NBO charge analysis revealed that the soft carbon nucleophile **C3** preferentially attacks at the soft electrophile **C2**. Moreover, *ortho*-formyl cinnamate **1a** combined with urea **C8** via O $\cdots$ H–N hydrogen bond, which could drive the charge transferred from **C1** to oxygen atom, and thus enhanced the C=O-selectivity.



### 11.3 <sup>1</sup>H NMR mechanistic experiments

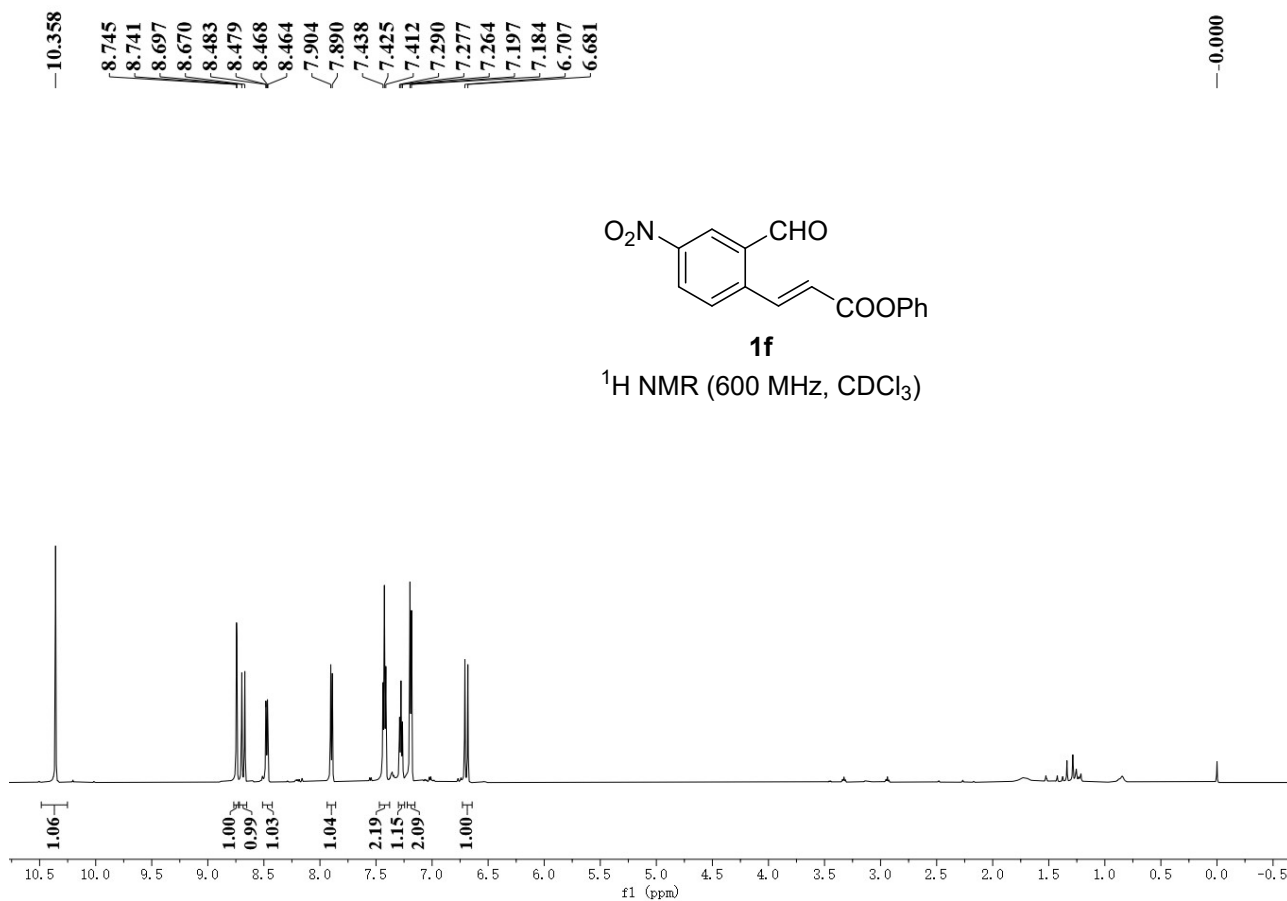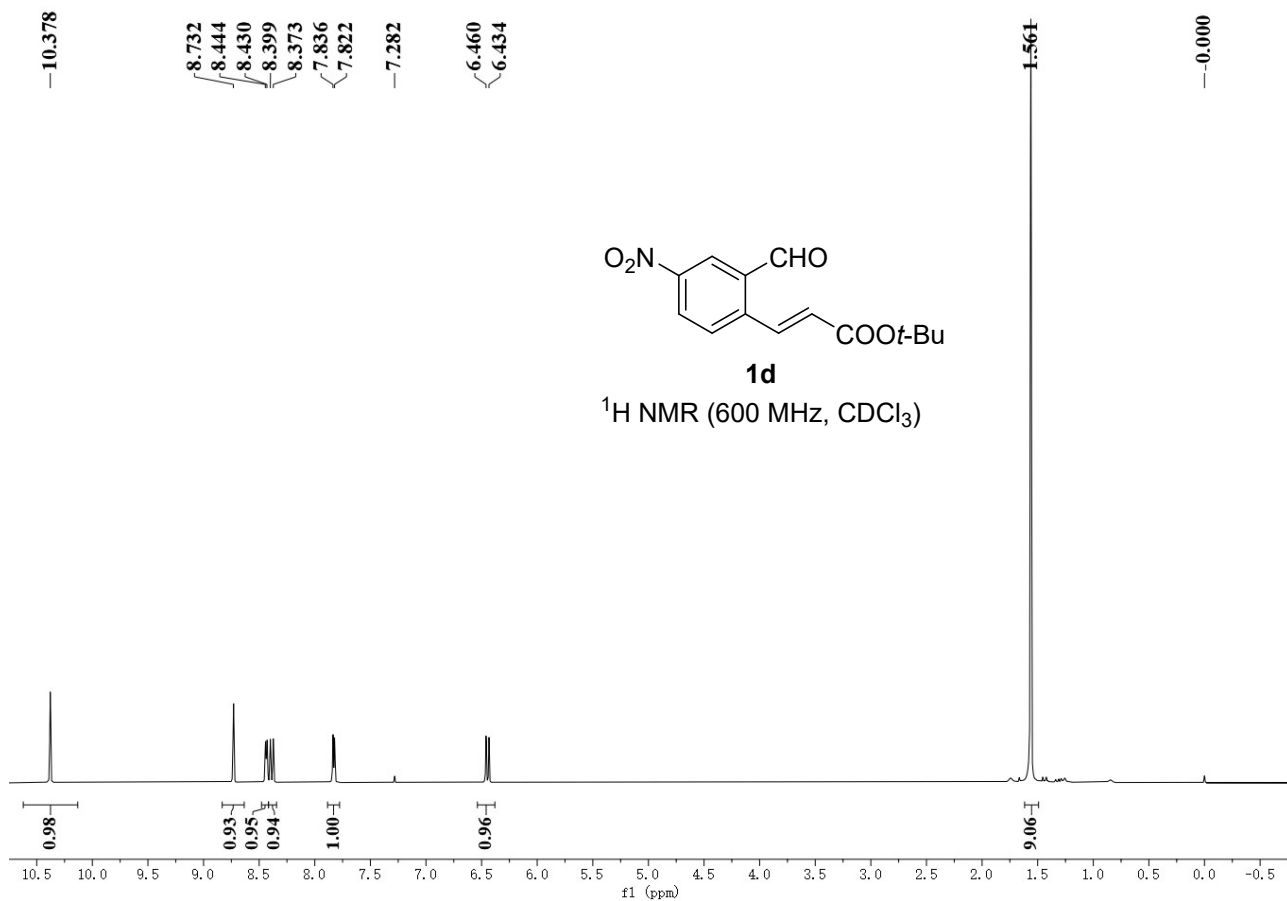

7.987  
7.589  
7.380

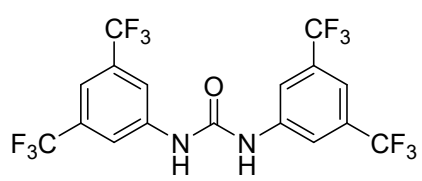

**C8**

<sup>1</sup>H NMR (600 MHz, CDCl<sub>3</sub>)

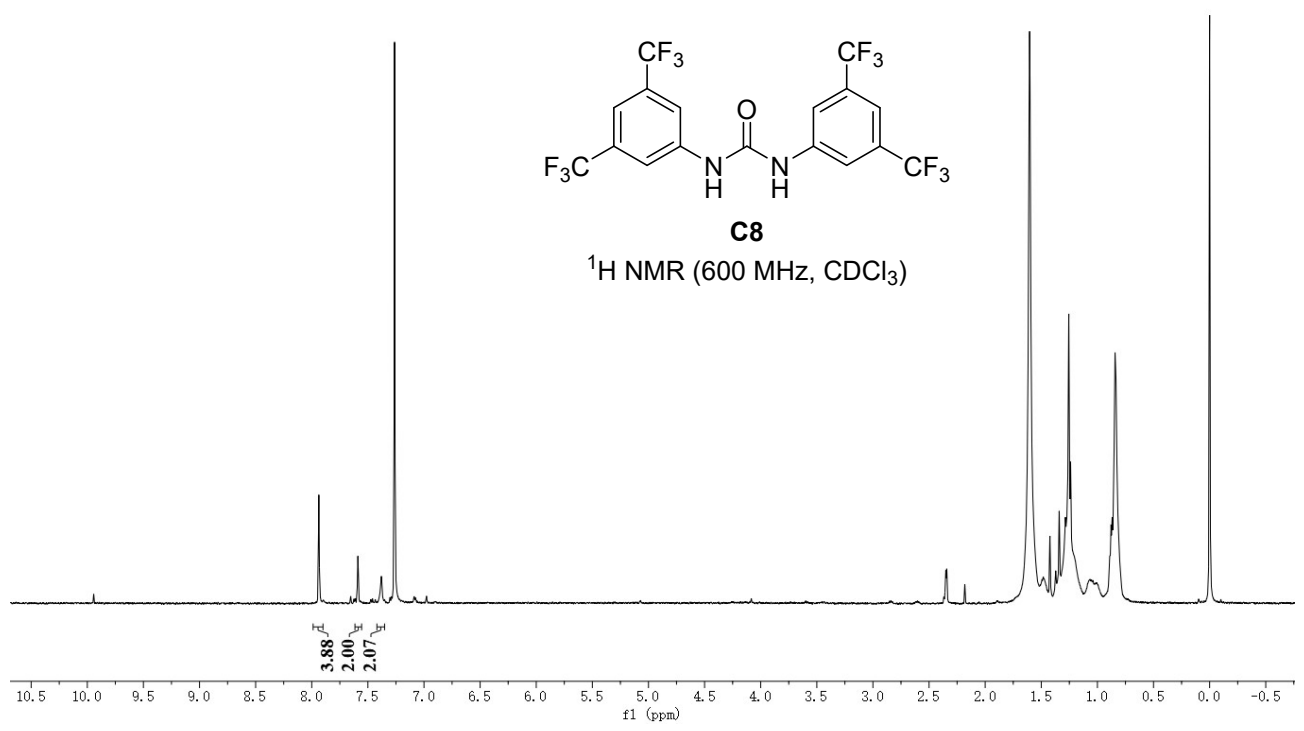

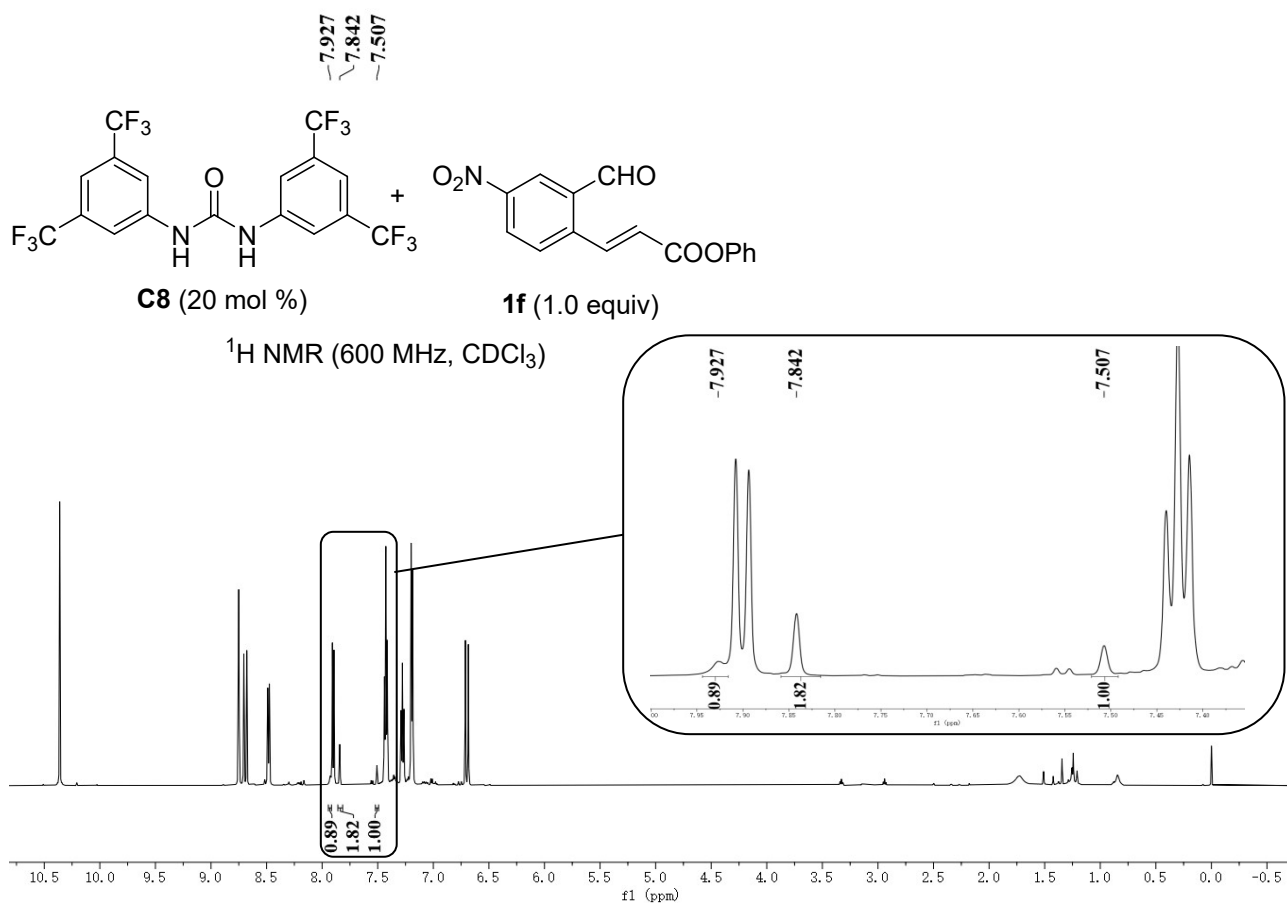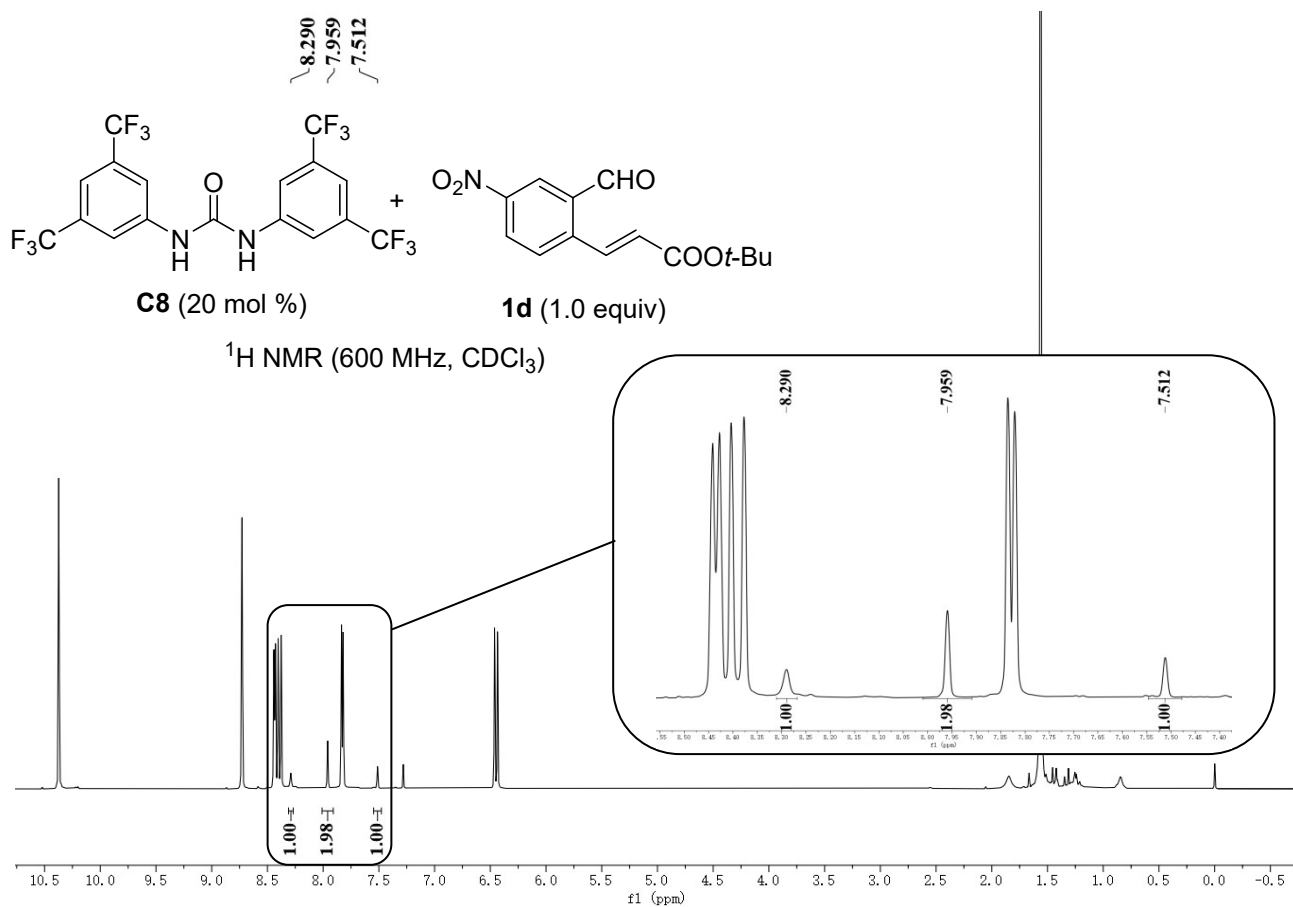

---

## 12. References

- [1] (a) S.Y. Liang, B. Jiang, B.X. Xiao. et al., *ChemCatChem* 12 (2020) 5374-5377. (b) B. Jiang, B.X. Xiao, Q. Ouyang. et al., *Org. Lett.* 21 (2019) 3310-3313.
- [2] (a) J.B. Lu, C.H. Shi, D. Hu. et al., *Org. Lett.* 23 (2021) 145-149. (b) N. Yasmin, M. Ghosh, J.K. Ray, *RSC Adv.* 4 (2014) 19932-19938.
- [3] B.M. Trost, G. Mata, *Angew. Chem. Int. Ed.* 57 (2018) 12333-12337.
- [4] M.J. Frish, G.W. Trucks, H.B. Schlegel, et al., *Gaussian 16, Revision C.01*, Gaussian. Inc., Wallingford CT, 2016.
- [5] M. Couty, M.B. Hall, *J. Comput. Chem.* 17 (1996) 1359-1370.
- [6] E.D. Glendening, C.R. Landis, F. Weinhold, *Wiley Interdiscip. Rev. Comput. Mol. Sci.* 2 (2012) 1-42.
- [7] A.E. Reed, L.A. Curtiss, Weinstock. et al., *J. Chem. Phys.* 88 (1988) 899-926.
- [8] C. Gonzalez, H.B. Schlegel, *J. Chem. Phys.* 90 (1989) 2154-2161.
- [9] A.V. Marenich, C.J. Cramer, D.G. Truhla, *J. Phys. Chem. B* 113 (2009) 6378-6396.

### 13. NMR and HRMS spectra

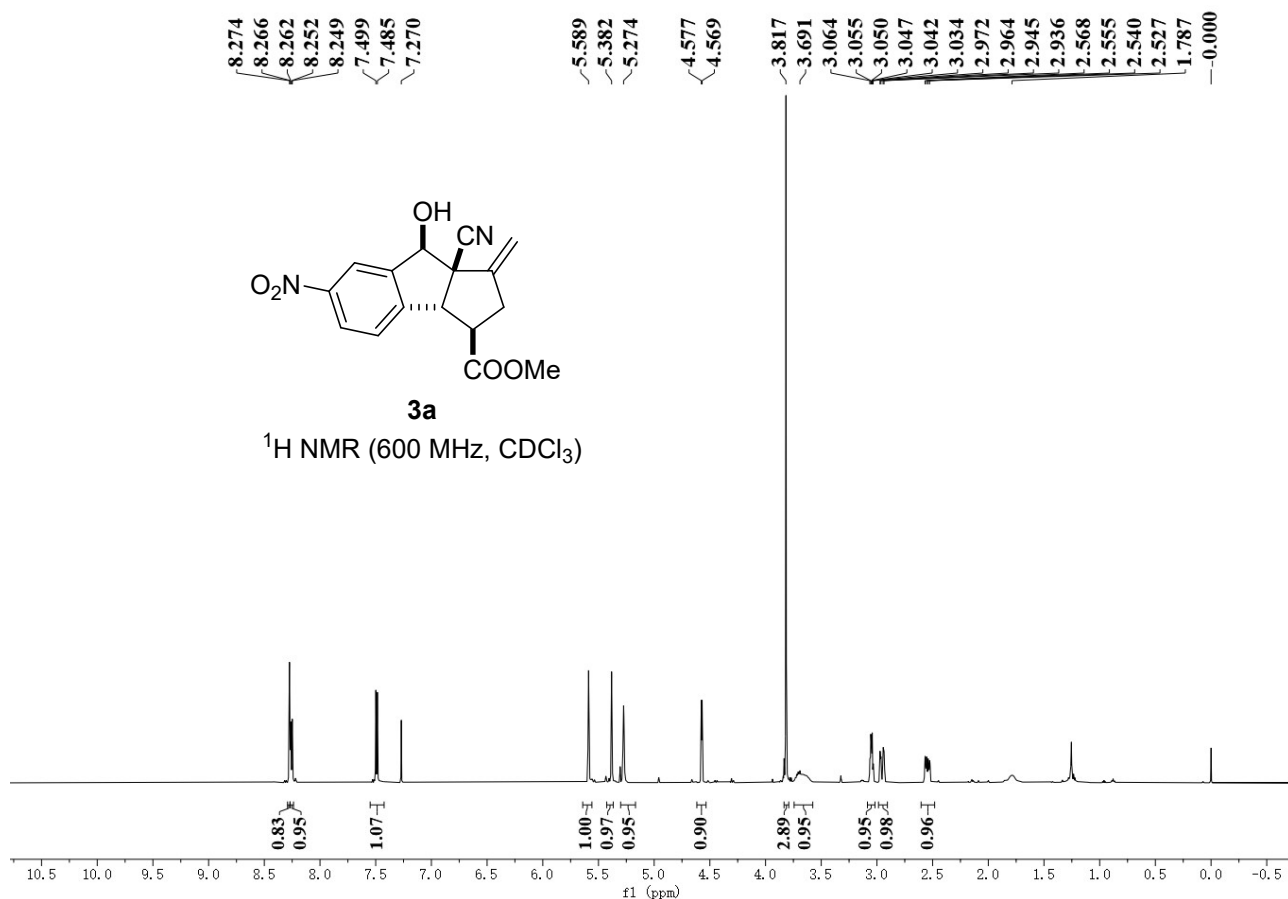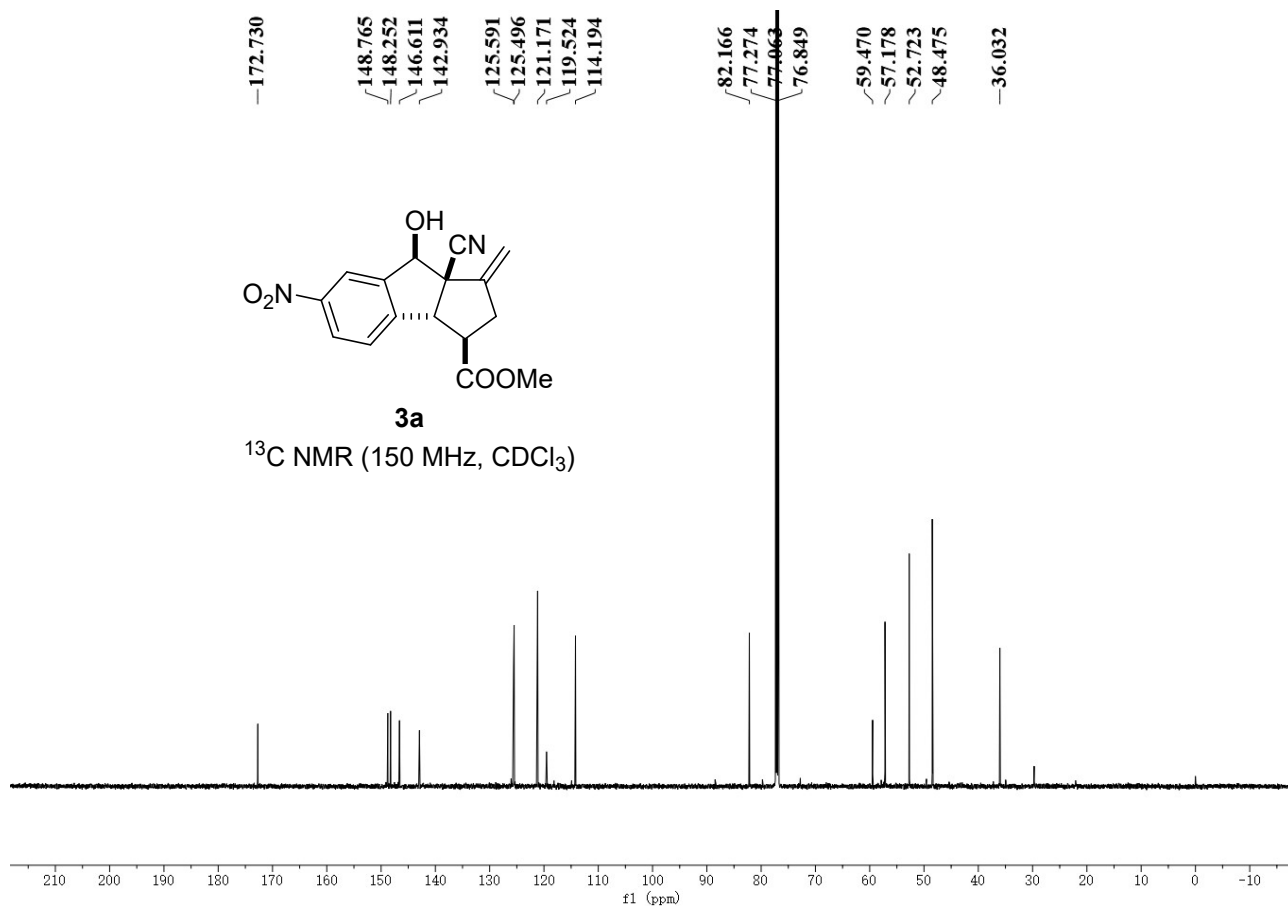

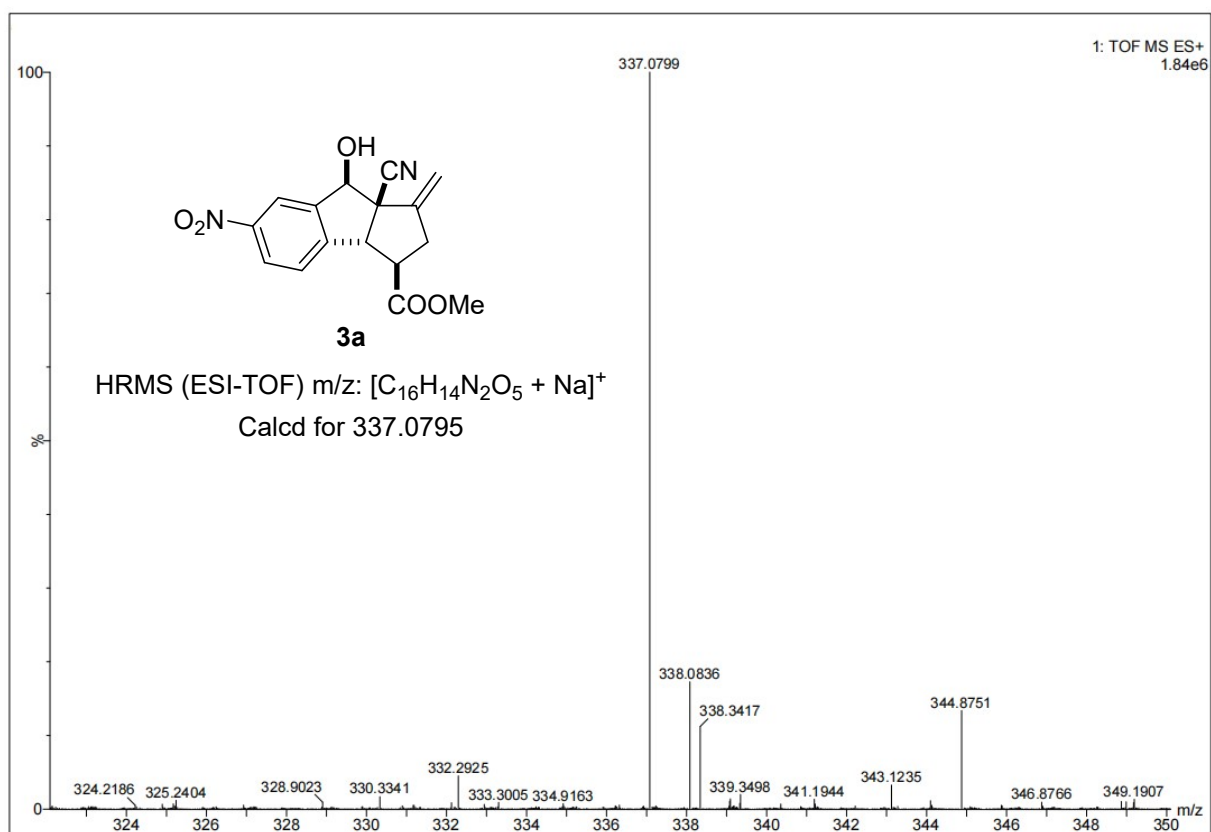

8.282  
8.273  
8.259  
7.507  
7.493  
7.268  
5.587  
5.584  
5.274  
5.266  
4.578  
4.570  
4.286  
4.274  
4.263  
3.467  
3.434  
3.039  
3.031  
3.026  
3.022  
3.017  
3.009  
2.976  
2.967  
2.949  
2.940  
2.570  
2.556  
2.542  
2.529  
1.347  
1.335  
1.323  
0.000

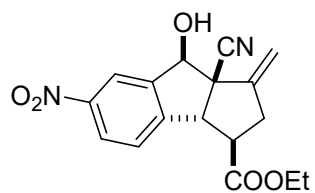

**3b**

$^1\text{H}$  NMR (600 MHz,  $\text{CDCl}_3$ )

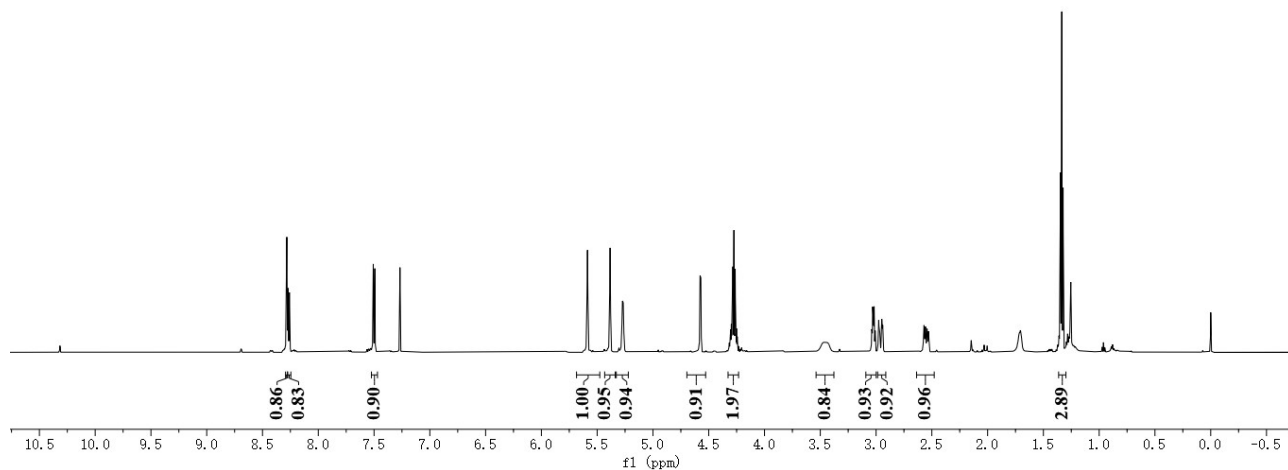

172.160  
148.771  
148.346  
146.677  
142.849  
125.599  
125.528  
121.149  
119.468  
114.092  
82.250  
77.266  
77.052  
76.842  
61.895  
59.584  
57.150  
48.678  
36.095  
14.185

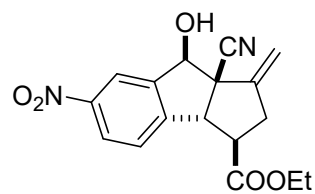

**3b**

$^{13}\text{C}$  NMR (150 MHz,  $\text{CDCl}_3$ )

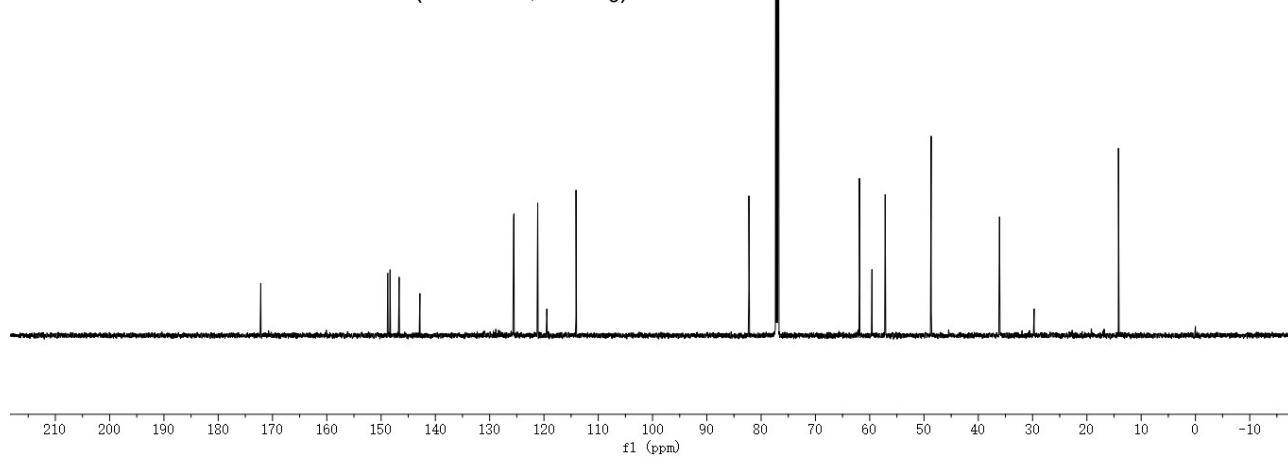

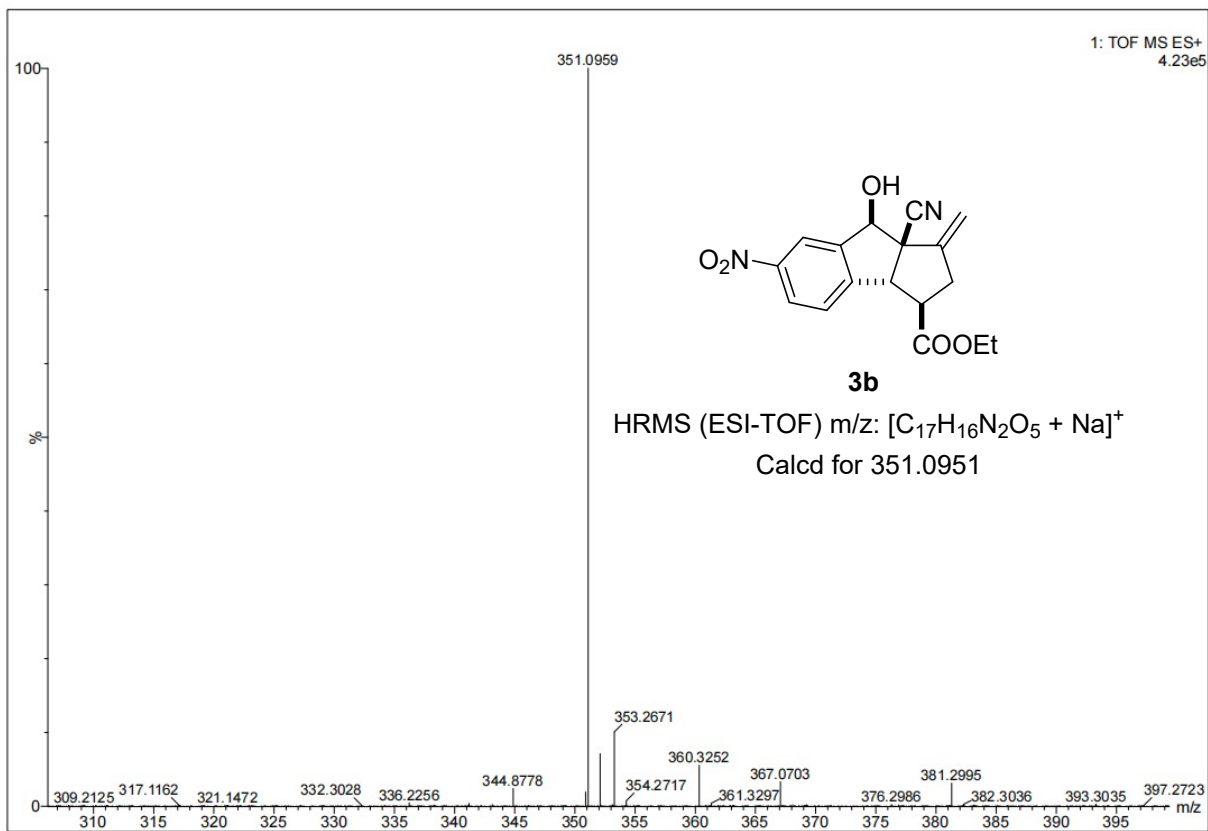



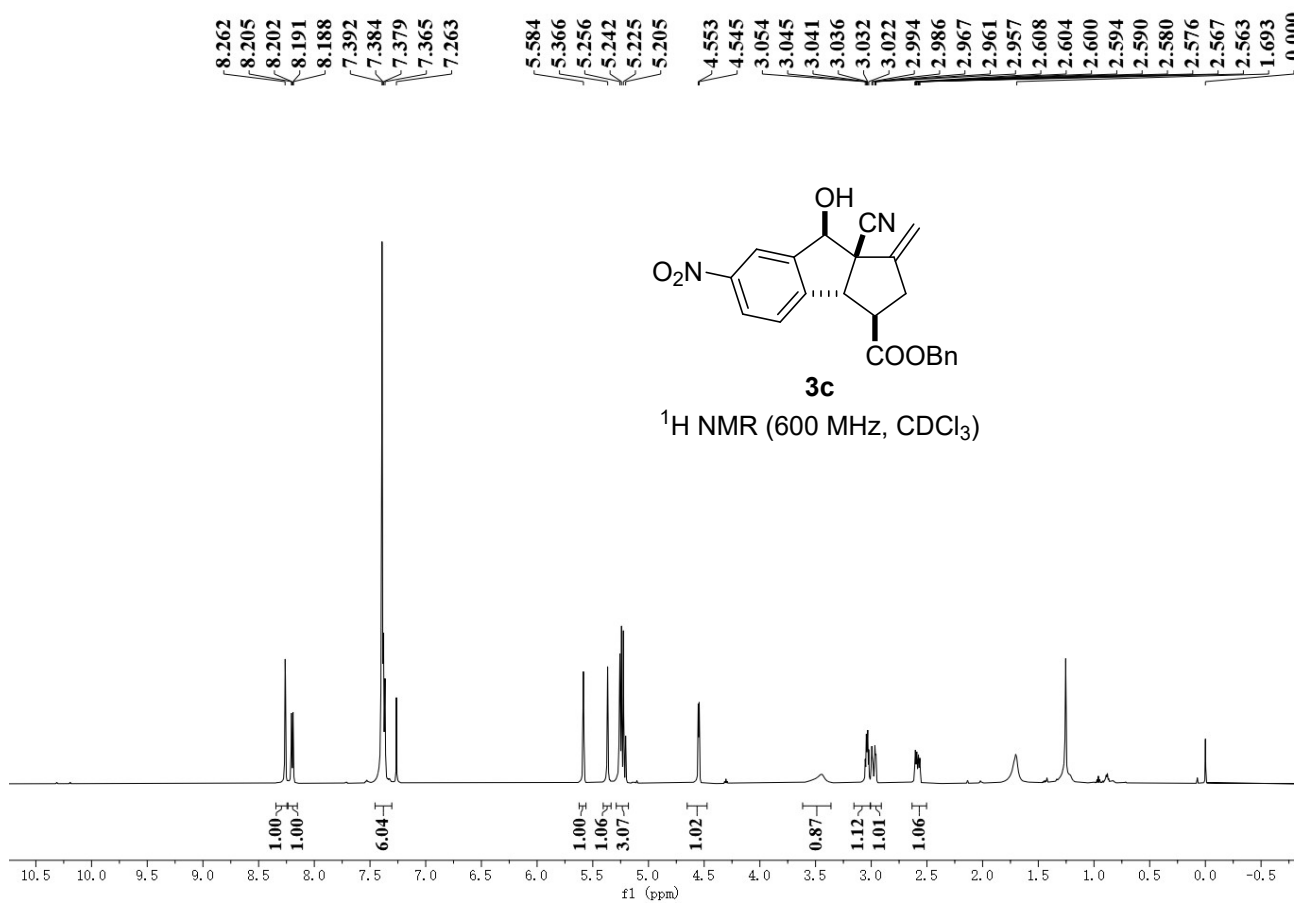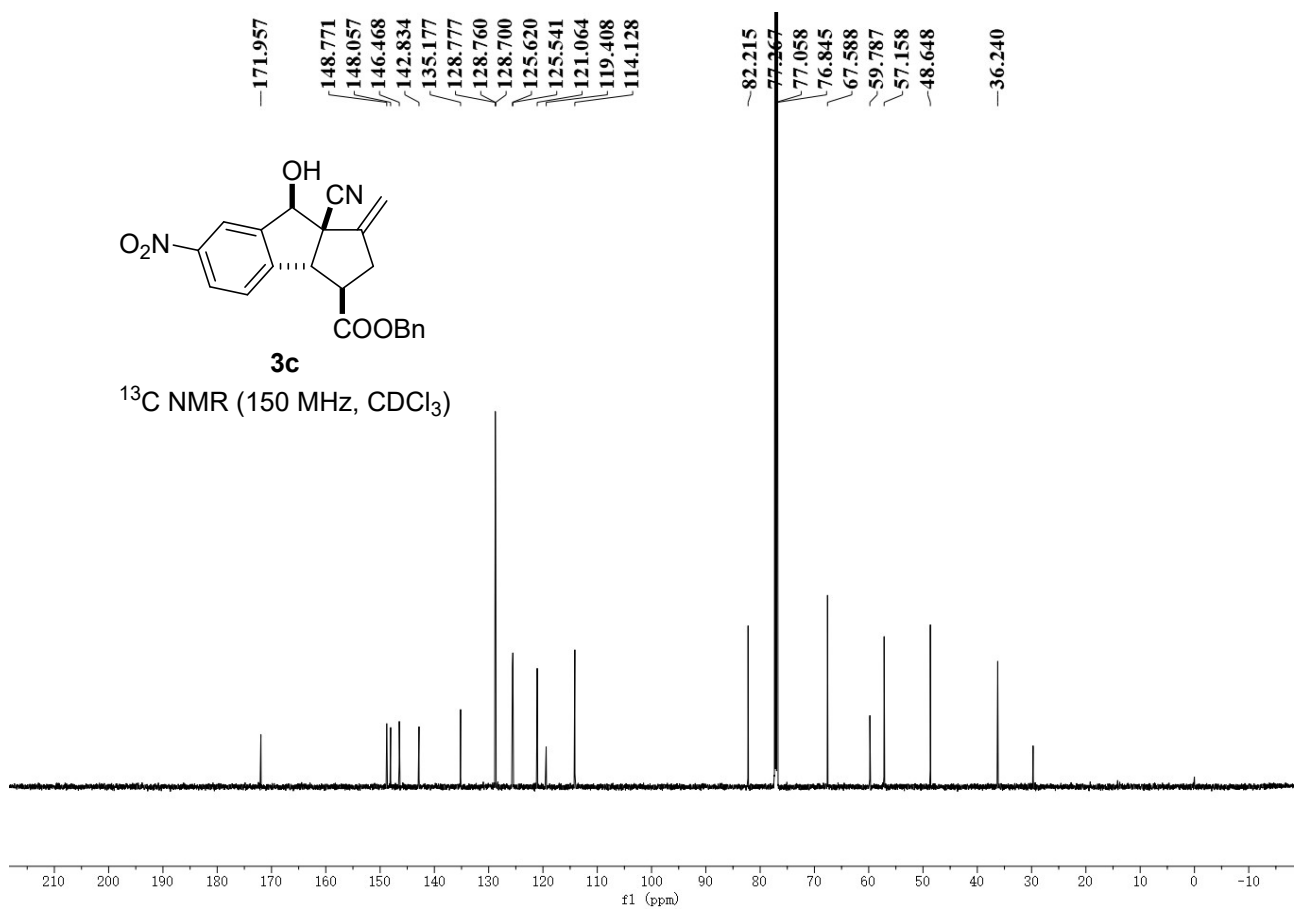

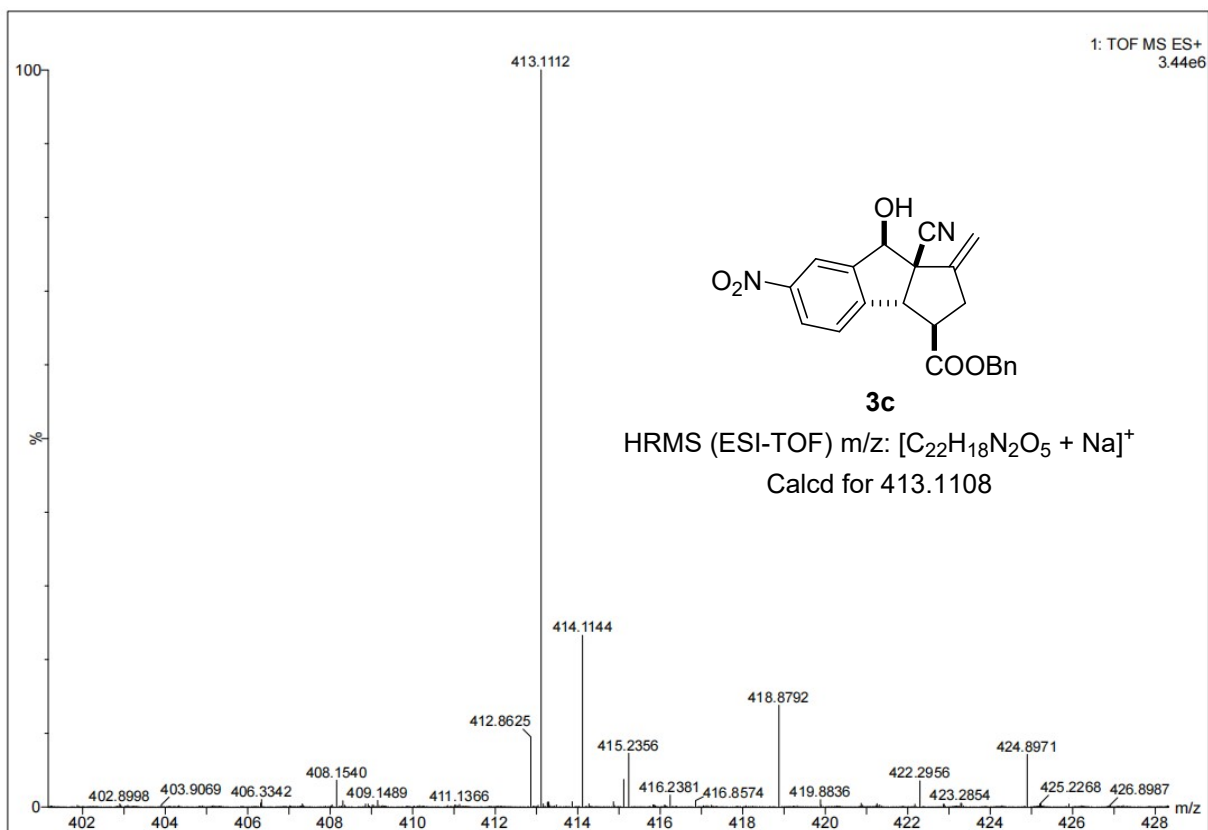

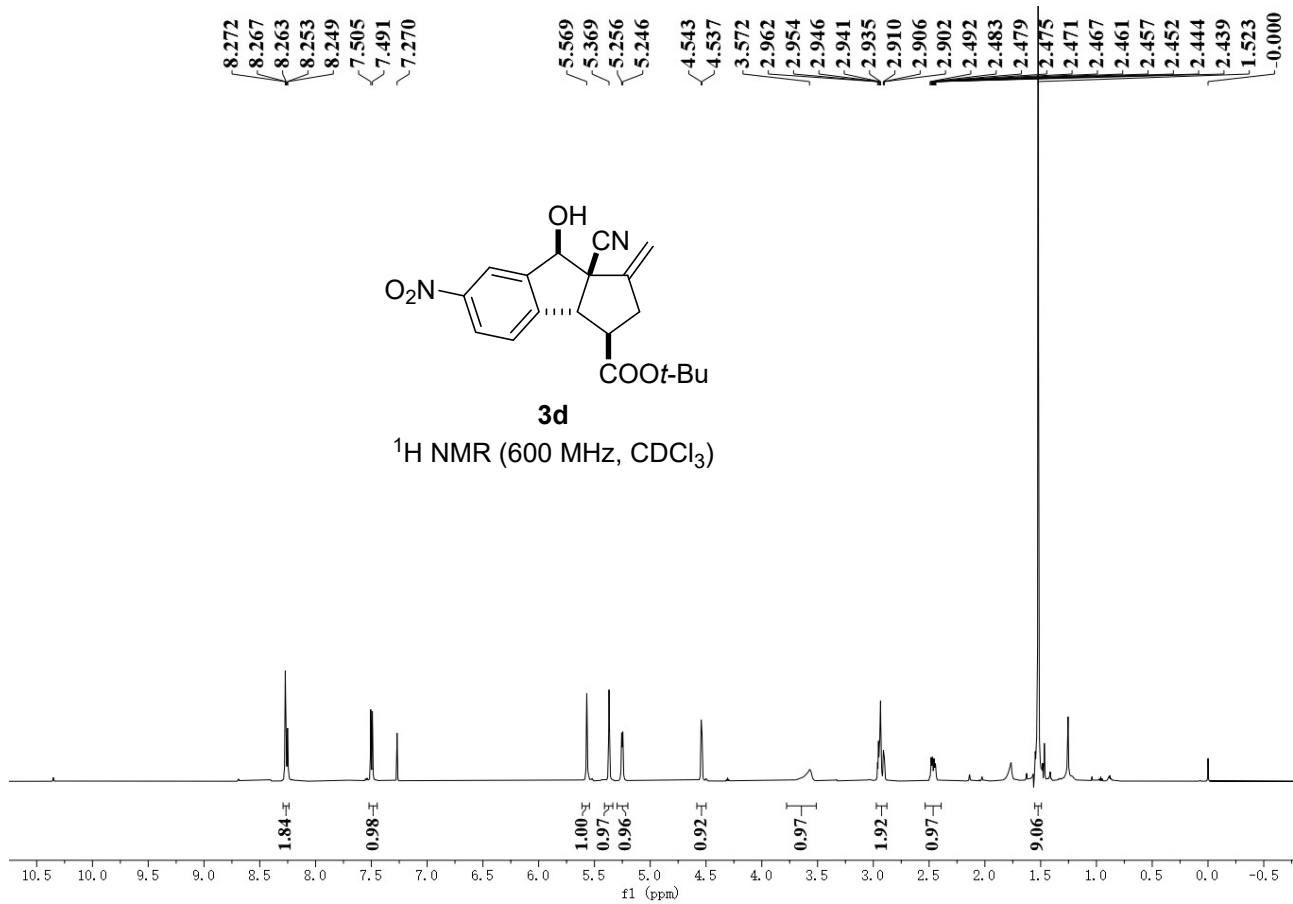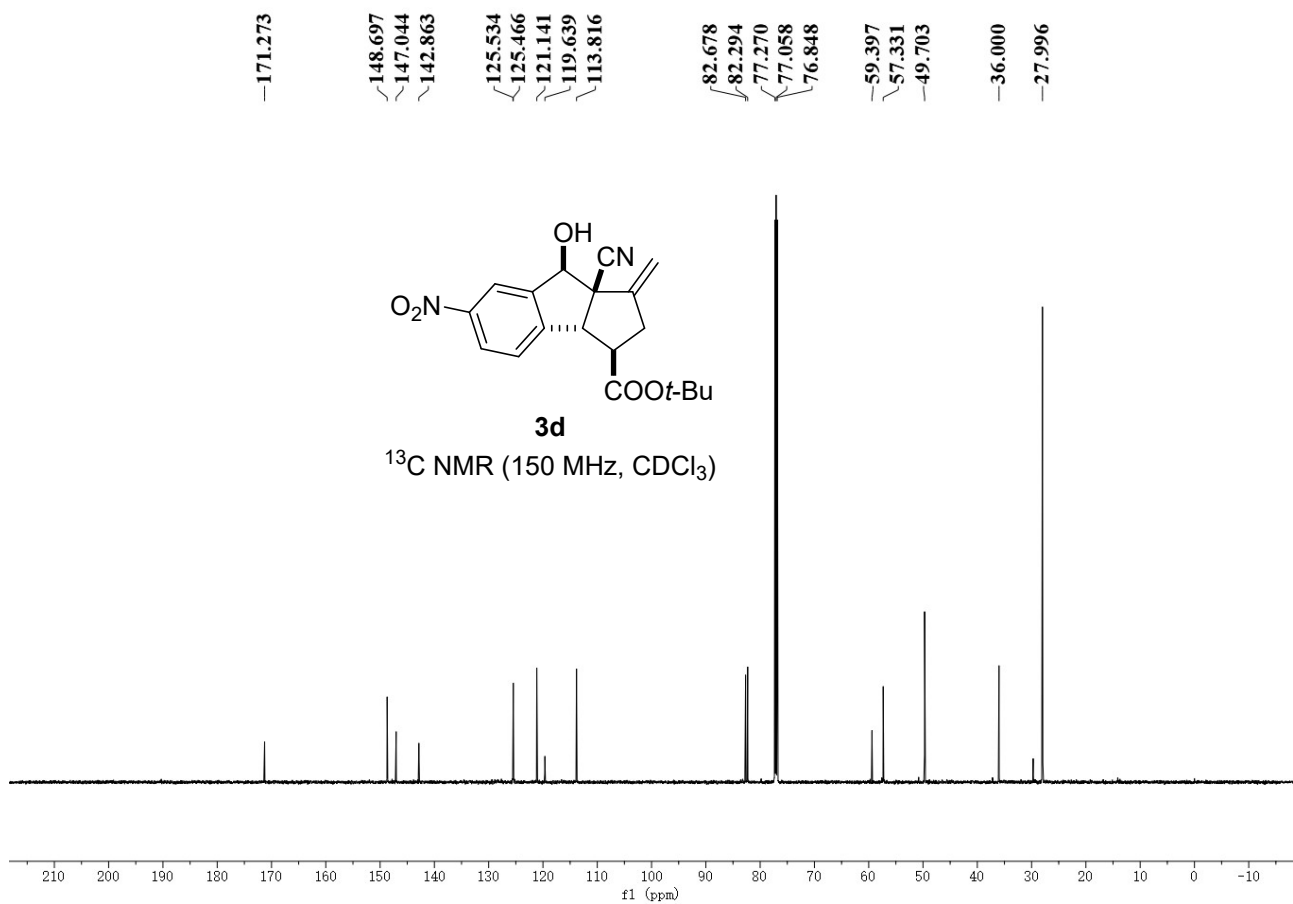

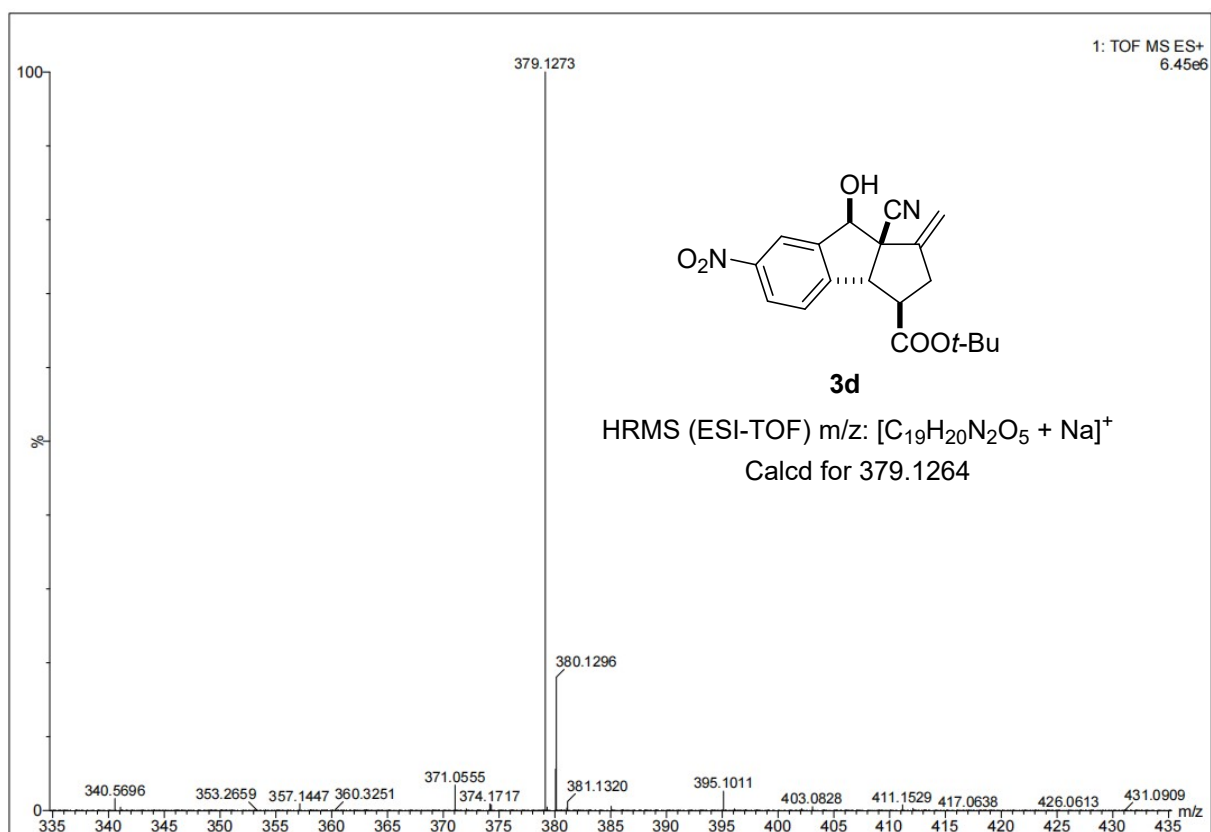

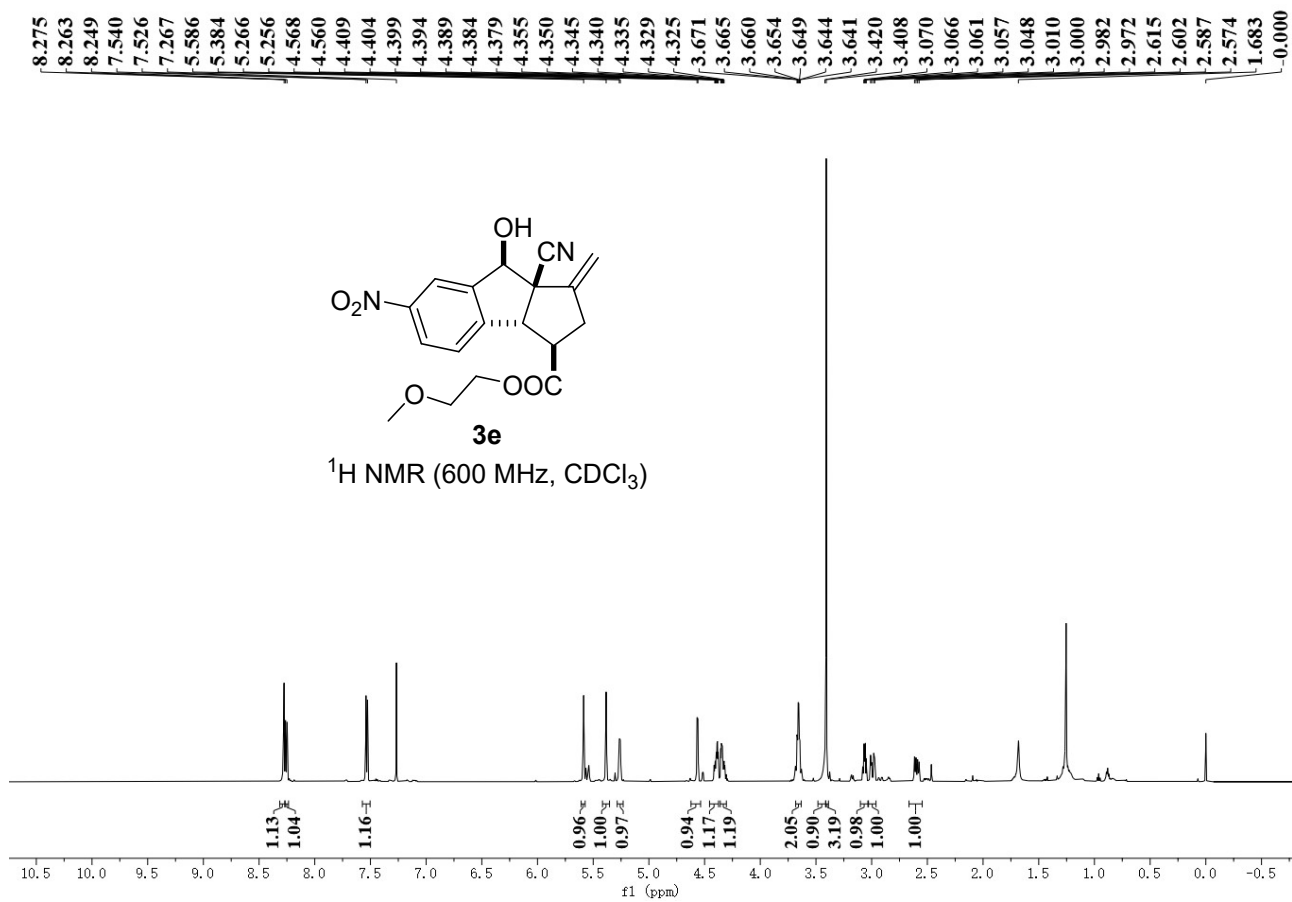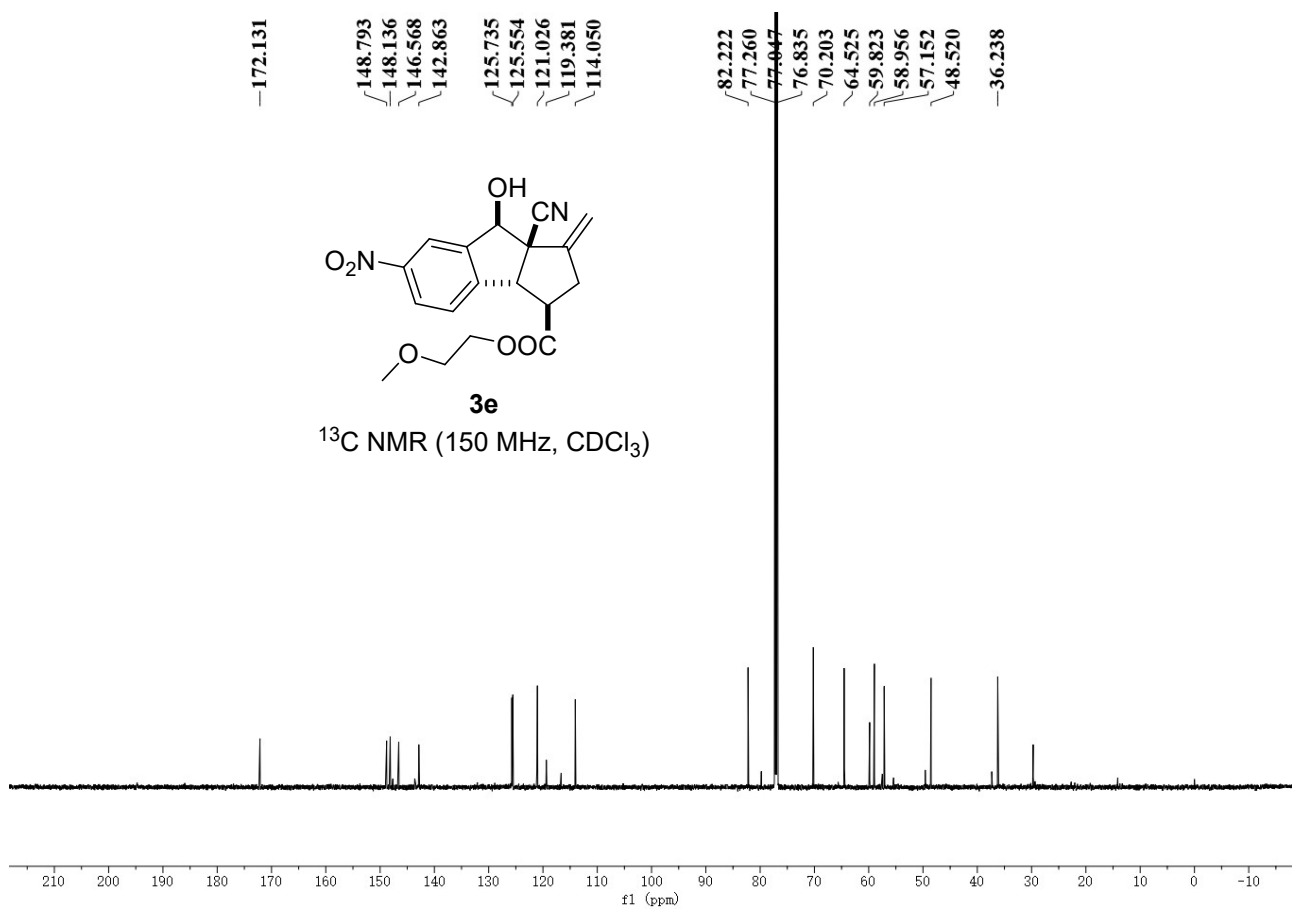

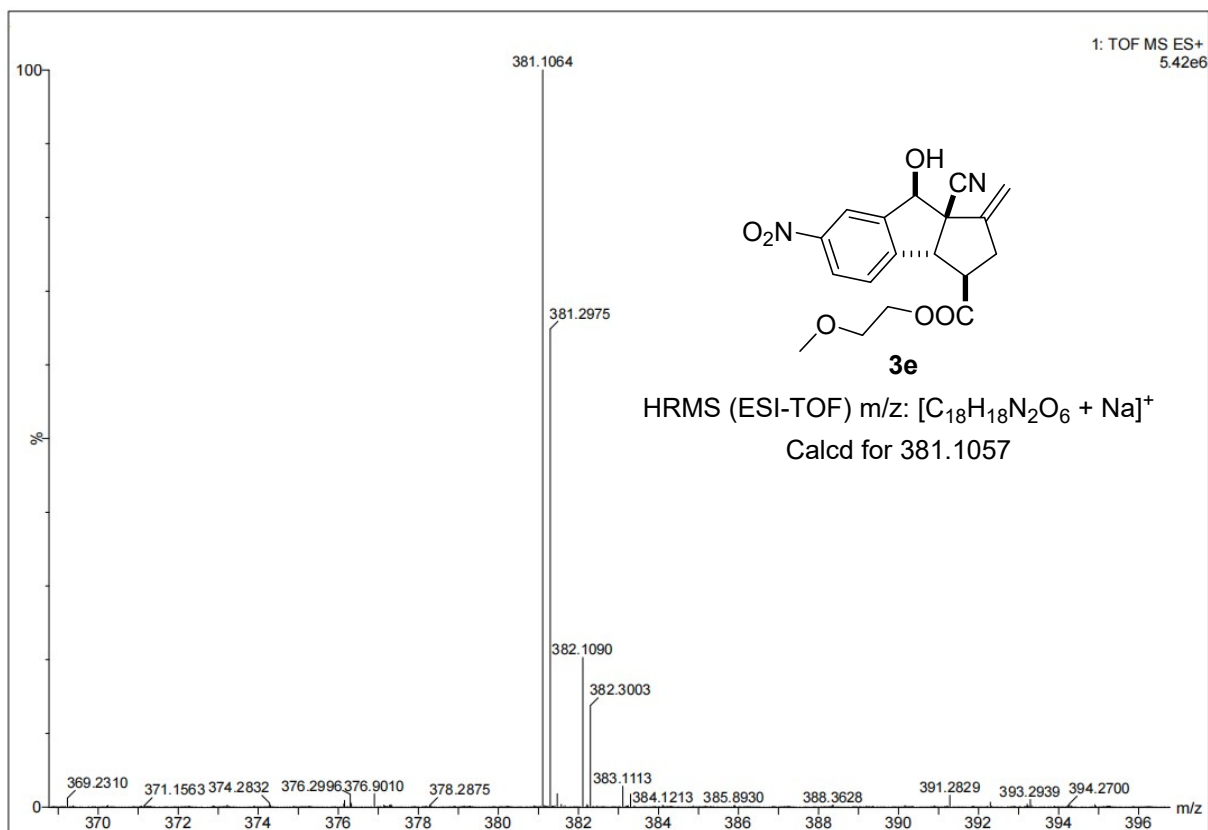

8.313  
8.310  
8.301  
8.298  
8.288  
8.284  
7.582  
7.568  
7.436  
7.423  
7.410  
7.297  
7.284  
7.272  
7.263  
7.160  
7.147  
5.641  
5.451  
5.311  
4.740  
4.732  
3.316  
3.308  
3.303  
3.299  
3.294  
3.286  
3.210  
3.157  
3.153  
3.148  
3.129  
3.125  
3.120  
2.701  
2.697  
2.693  
2.687  
2.683  
2.679  
2.673  
2.669  
2.665  
2.655  
1.621  
0 ppm

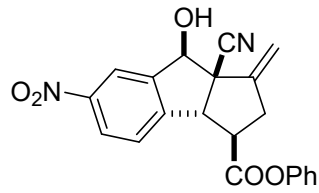

**3f**

$^1\text{H}$  NMR (600 MHz,  $\text{CDCl}_3$ )

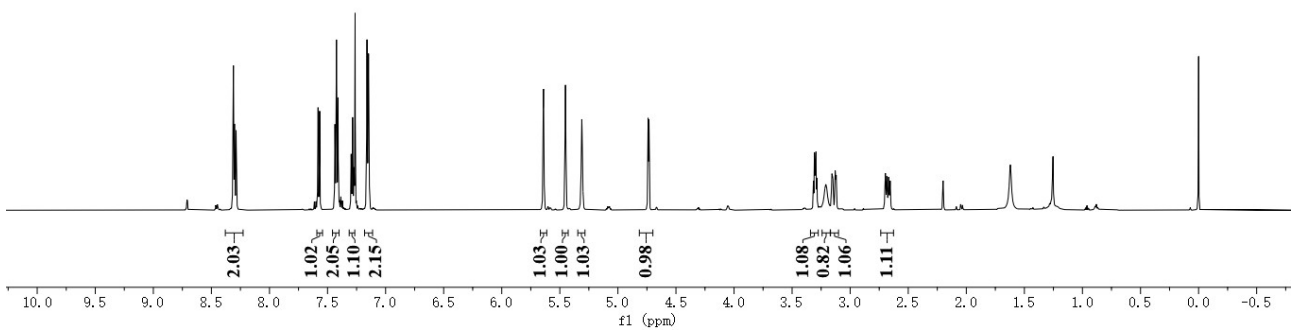

170.751  
150.353  
148.895  
147.976  
146.199  
142.862  
129.709  
126.443  
125.752  
125.606  
121.279  
121.230  
119.322  
114.591  
82.257  
77.260  
77.050  
76.837  
59.563  
57.194  
48.721  
35.921

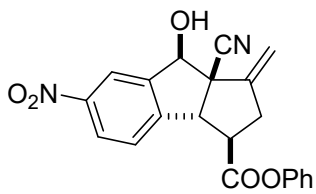

**3f**

$^{13}\text{C}$  NMR (150 MHz,  $\text{CDCl}_3$ )

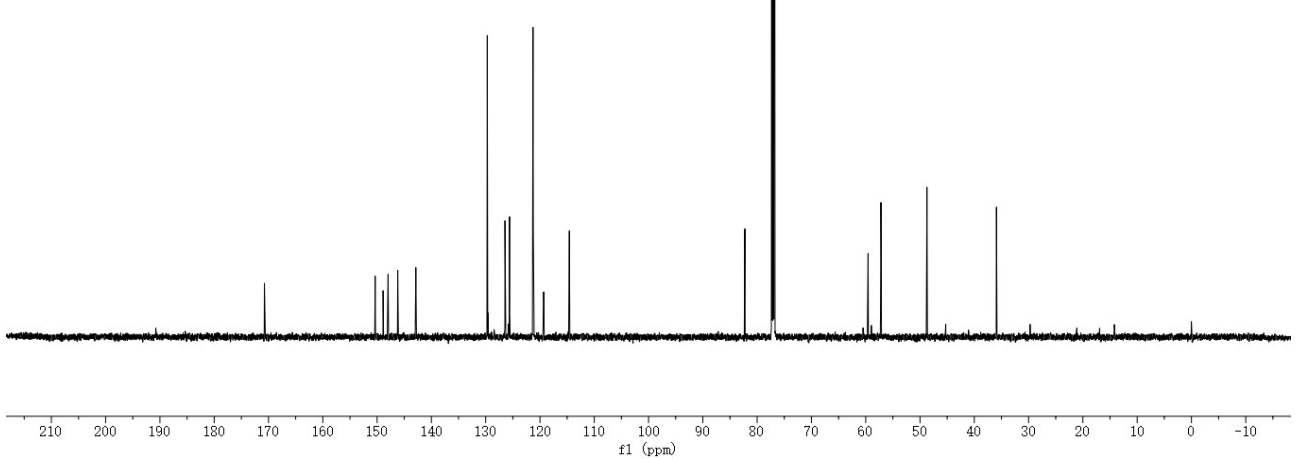

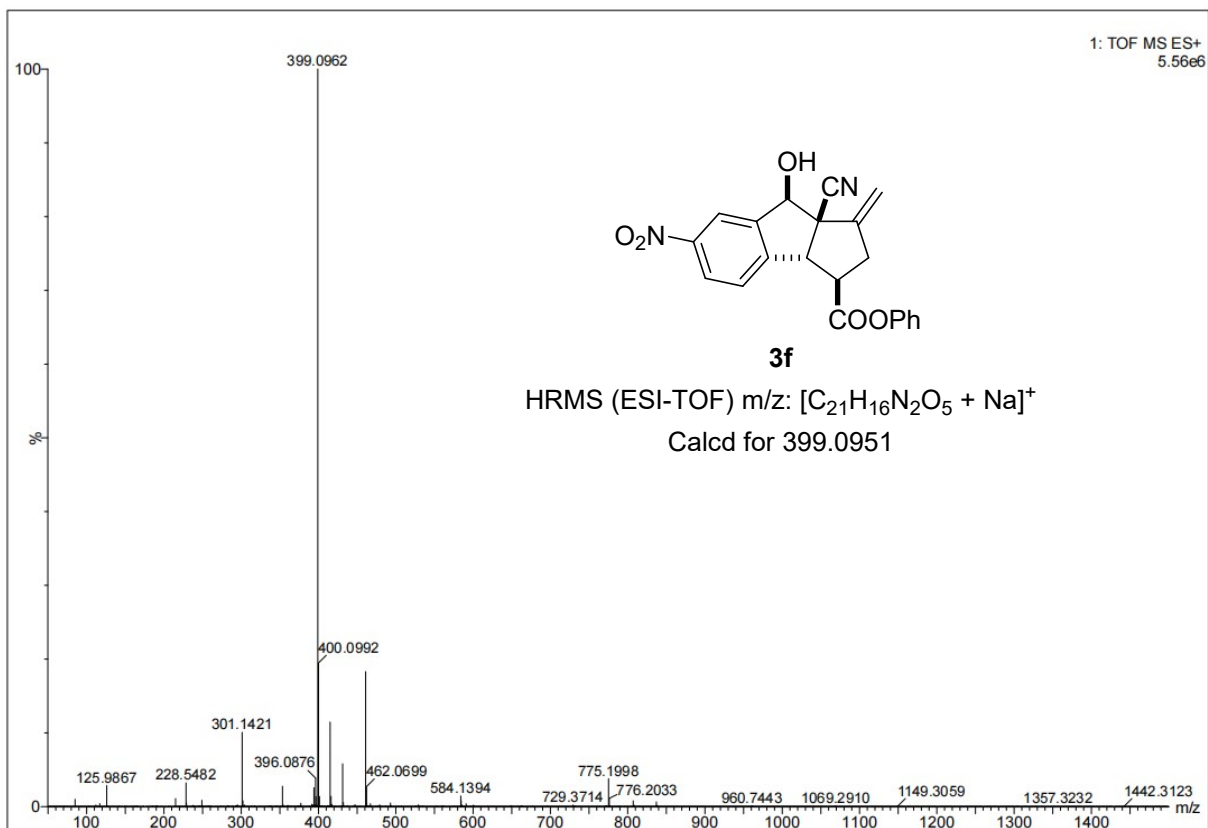



8.265  
8.240  
8.226  
7.561  
7.547  
7.269  
5.591  
5.379  
5.323  
-4.714  
-3.828  
3.353  
3.224  
3.198  
2.487  
2.461  
-0.953  
-0.000

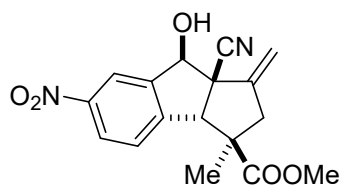

**3g**

<sup>1</sup>H NMR (600 MHz, CDCl<sub>3</sub>)

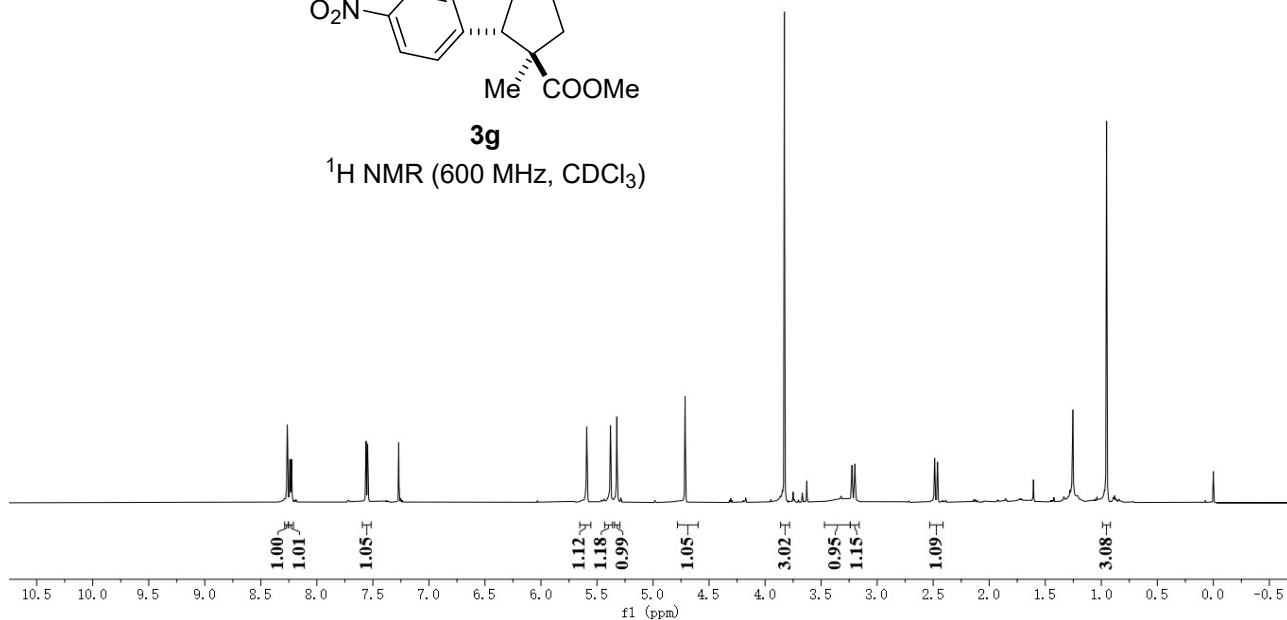

-175.506  
148.879  
146.859  
145.630  
144.484  
127.398  
124.943  
120.567  
118.913  
113.644  
82.907  
77.271  
77.059  
76.848  
61.347  
60.067  
52.954  
51.372  
45.933  
-20.853

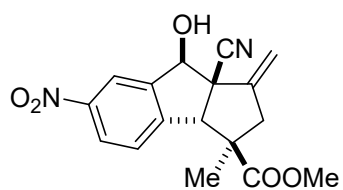

**3g**

<sup>13</sup>C NMR (150 MHz, CDCl<sub>3</sub>)

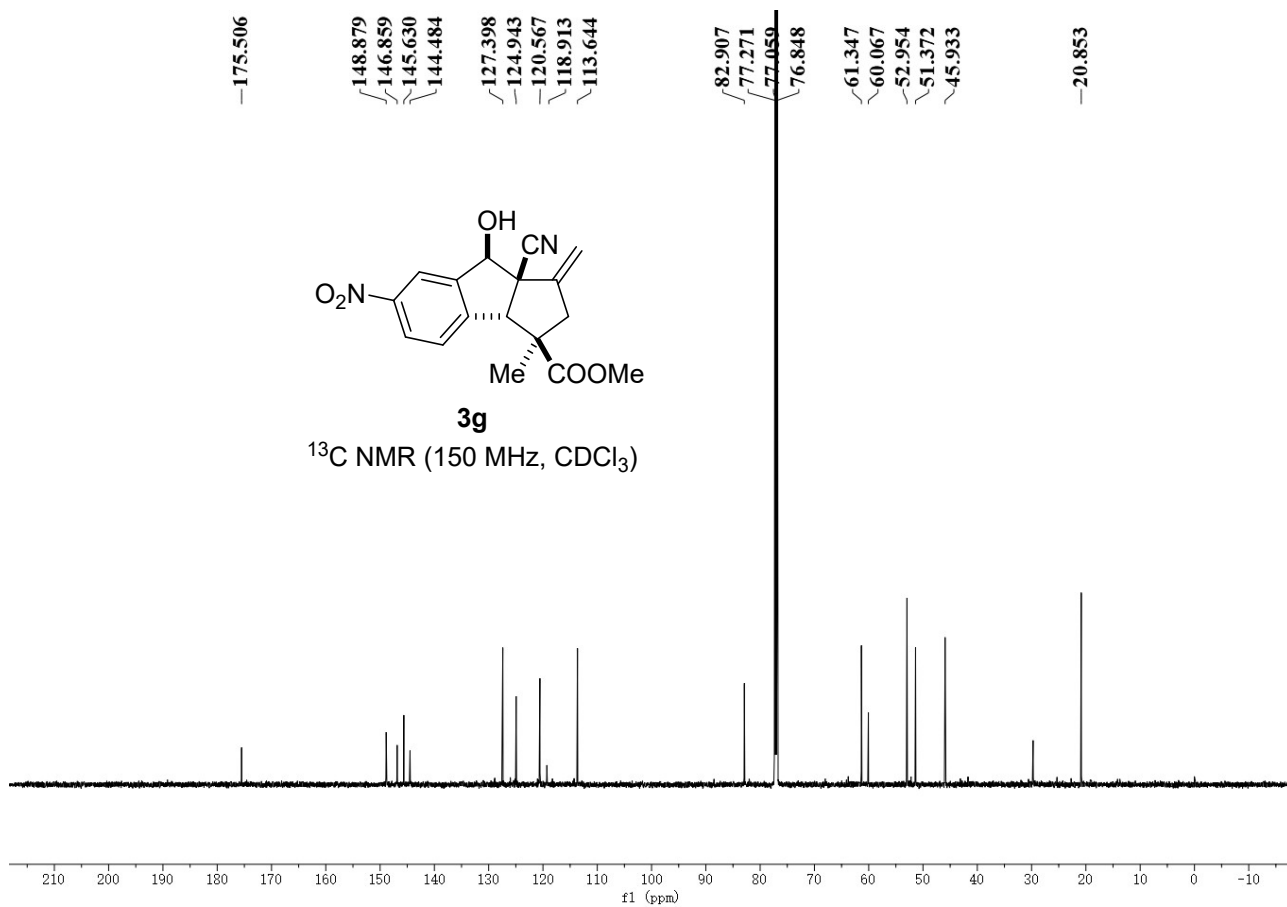

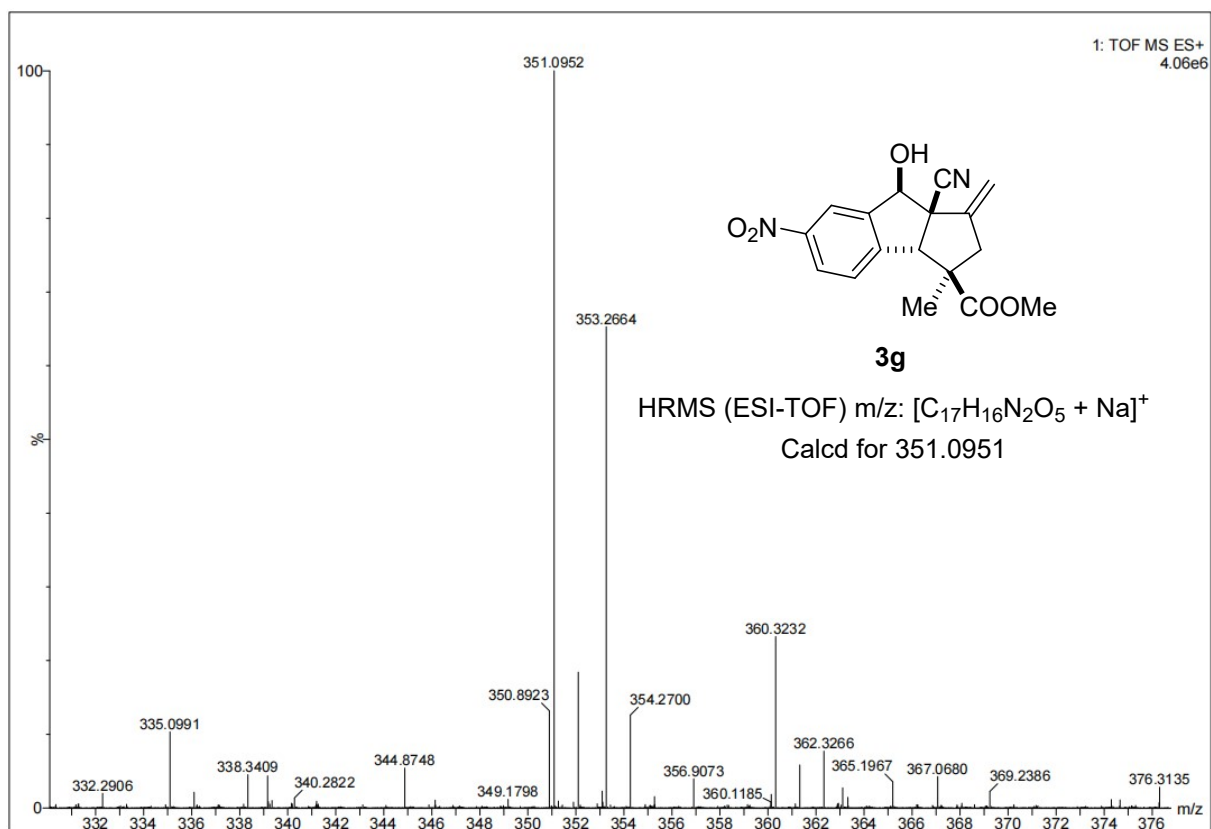

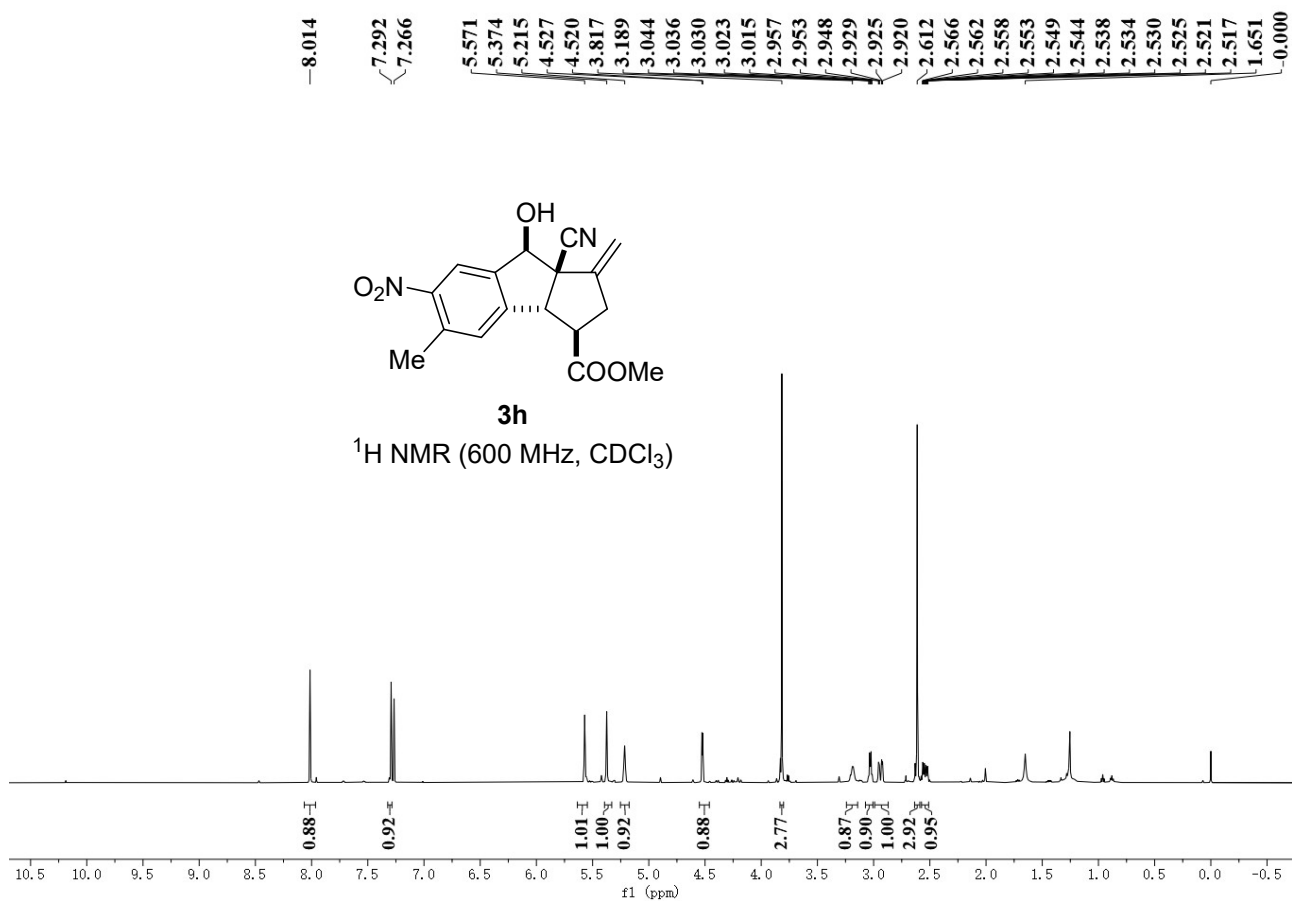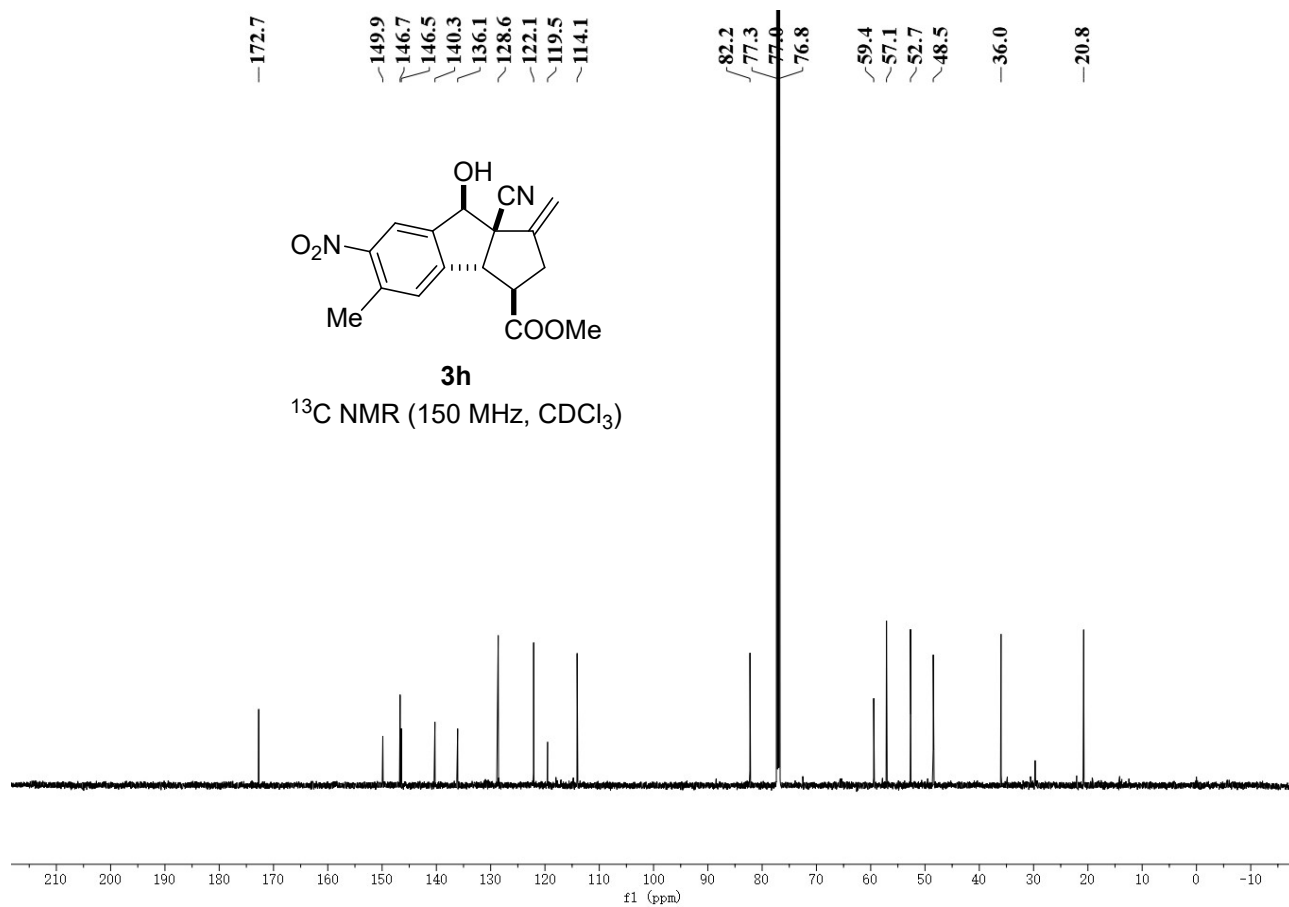

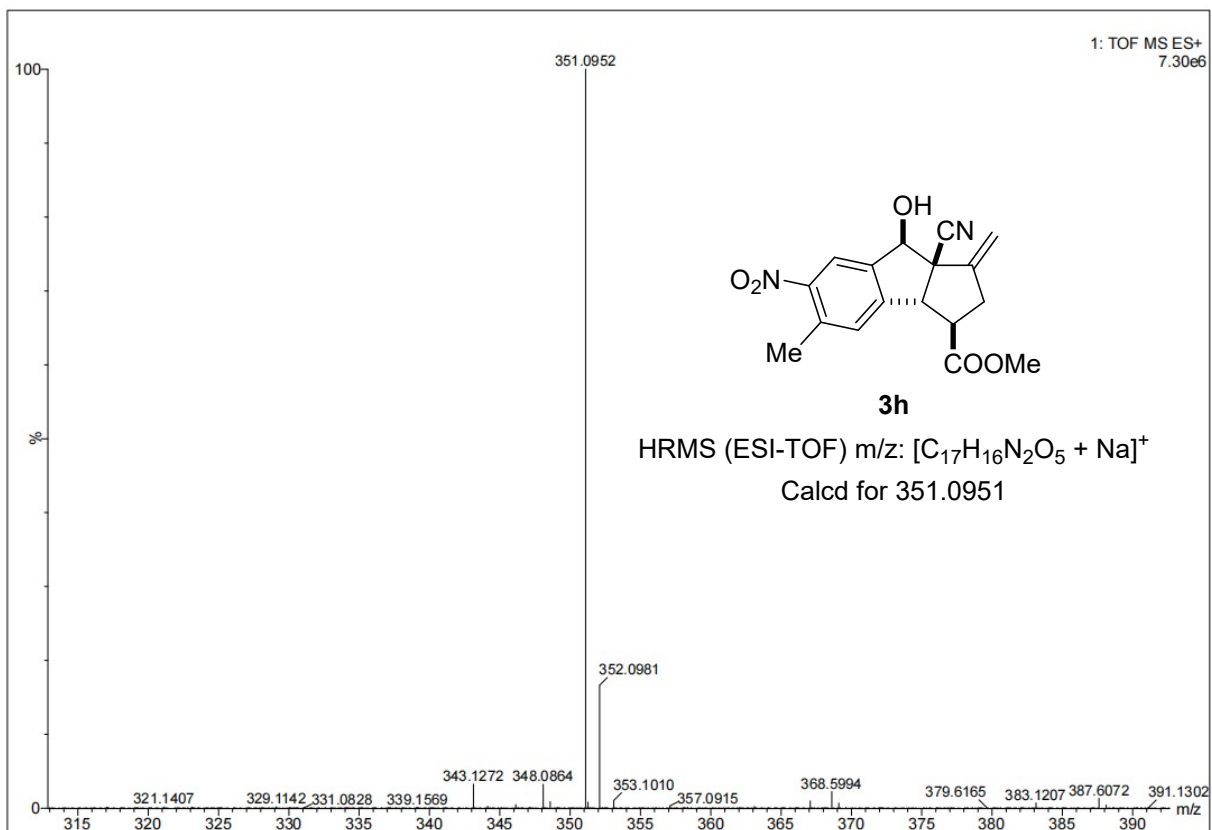

7.909  
7.576  
7.433  
7.420  
7.407  
7.295  
7.283  
7.271  
7.262  
7.151  
7.138

5.614  
5.441  
5.235

4.688  
4.681

3.725  
3.283  
3.275  
3.270  
3.267  
3.262  
3.253  
3.145  
3.136  
3.117  
3.108  
2.718  
2.705  
2.690  
2.677  
1.716

-0.000

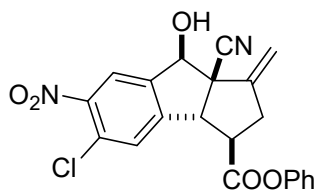

**3i**

$^1\text{H NMR}$  (600 MHz,  $\text{CDCl}_3$ )

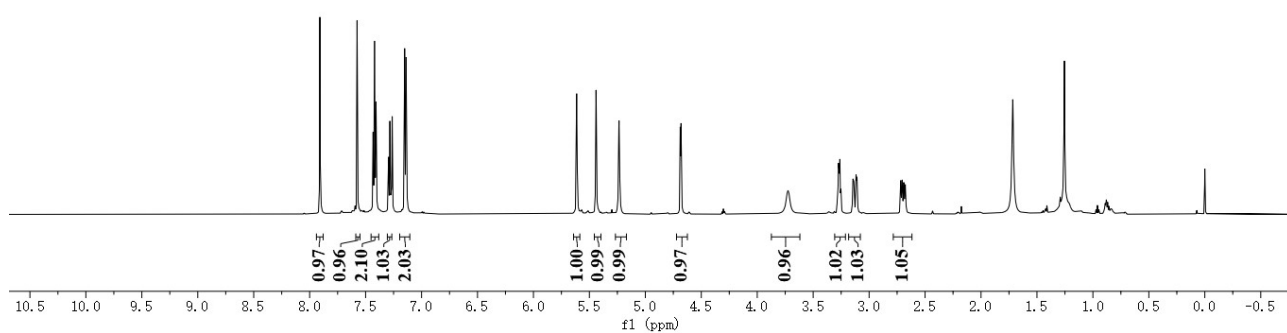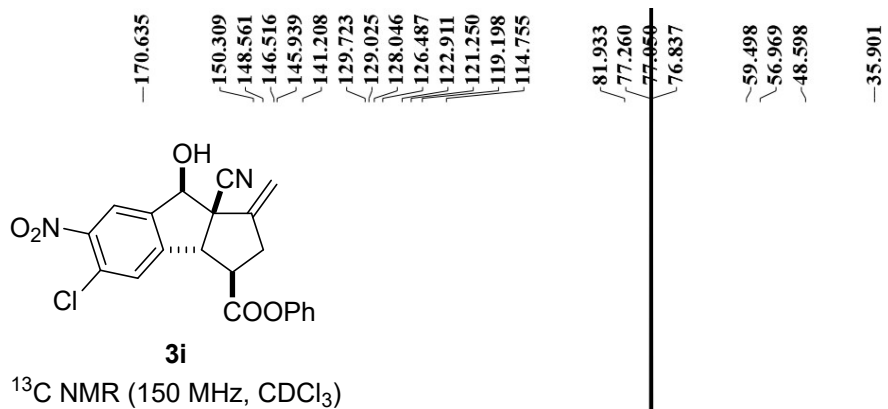

**3i**

$^{13}\text{C NMR}$  (150 MHz,  $\text{CDCl}_3$ )

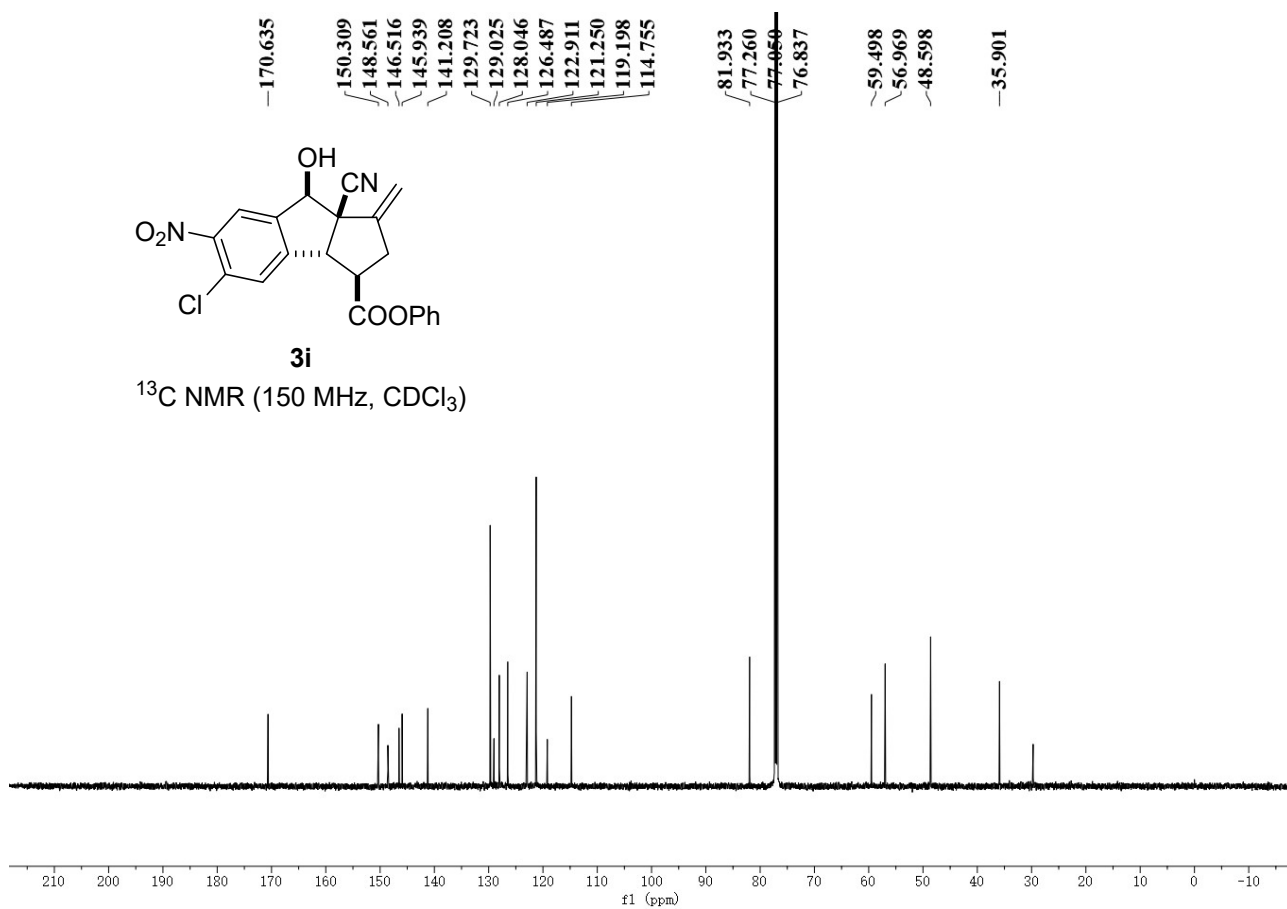

Spectrum from 20230617.wiff2 (sample 76) - 43, +TOF MS (200 - 600) from 0.037 to 0.088 min, noise filter...4 min, noise filtered (noise multiplier = 1.5), Gaussian smoothed (0.5 points)], Recalibrated, centroided

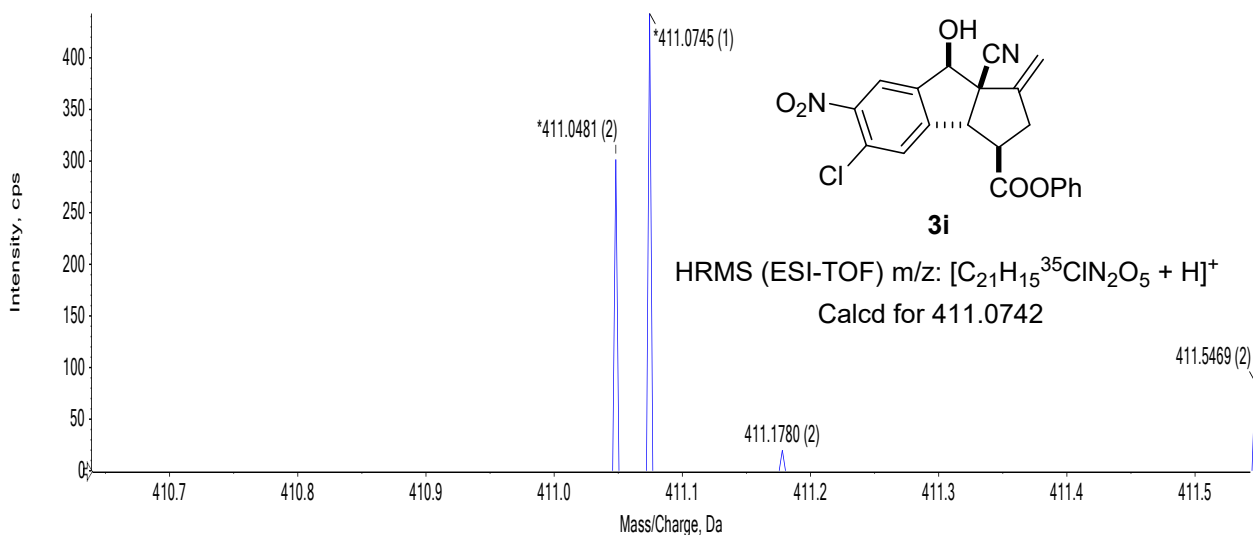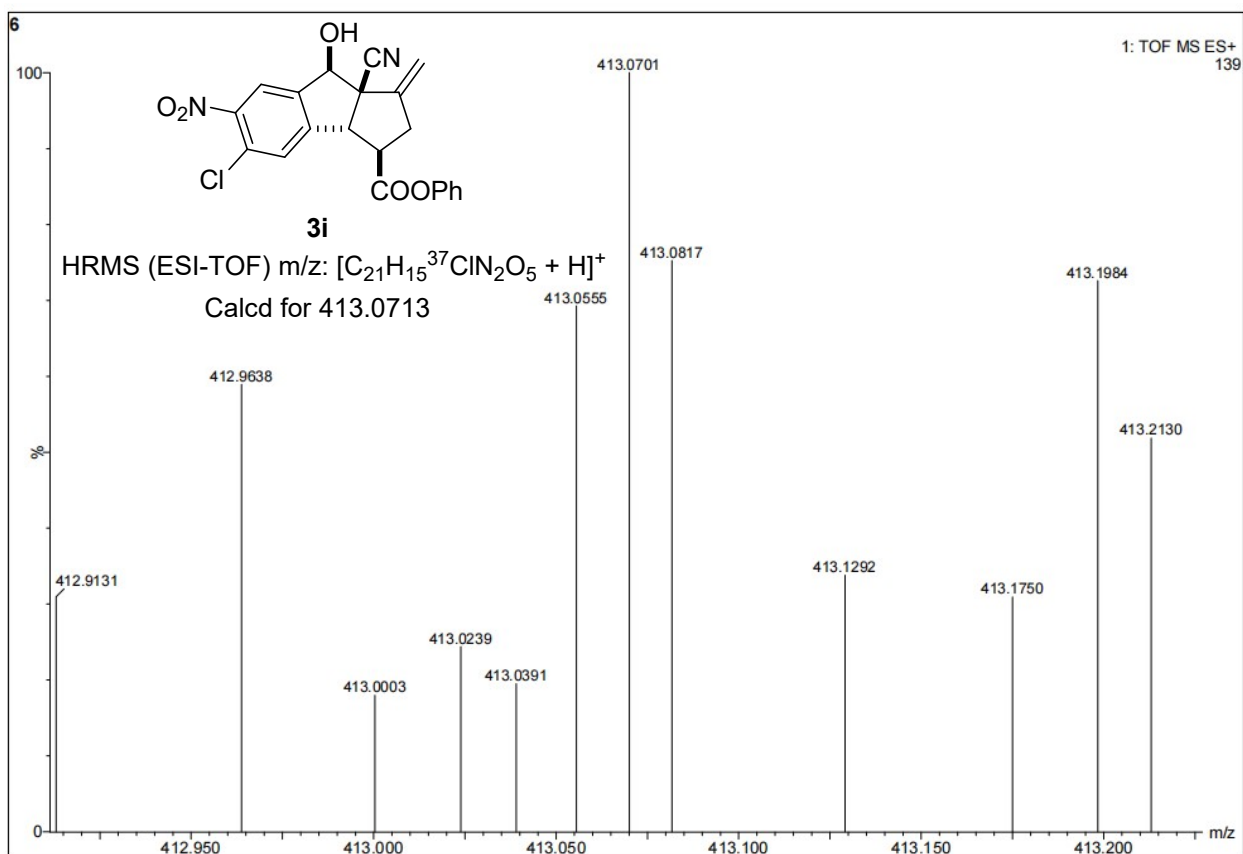

7.713  
7.685  
7.671  
7.519  
7.504  
7.427  
7.413  
7.400  
7.285  
7.271  
7.261  
7.164  
7.153

5.618  
5.421  
5.268

4.719

3.309  
3.302  
3.295  
3.288  
3.280  
3.274  
3.110  
3.082  
2.638  
2.625  
2.609  
2.596

-0.000

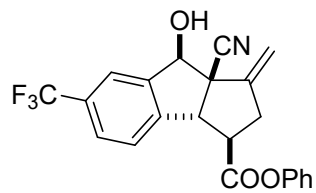

**3j**

$^1\text{H NMR}$  (600 MHz,  $\text{CDCl}_3$ )

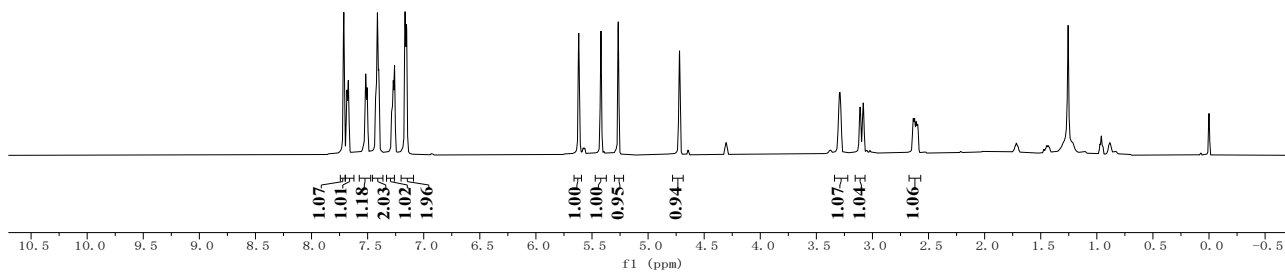

171.033

150.434  
146.691  
145.024  
141.922  
131.955  
131.739  
131.522  
131.306  
129.664  
127.529  
127.504  
126.342  
125.110  
122.926  
122.897  
121.337  
119.734

82.763  
77.260  
77.050  
76.837  
59.145  
57.354  
48.816

35.763

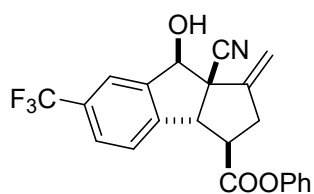

**3j**

$^{13}\text{C NMR}$  (150 MHz,  $\text{CDCl}_3$ )

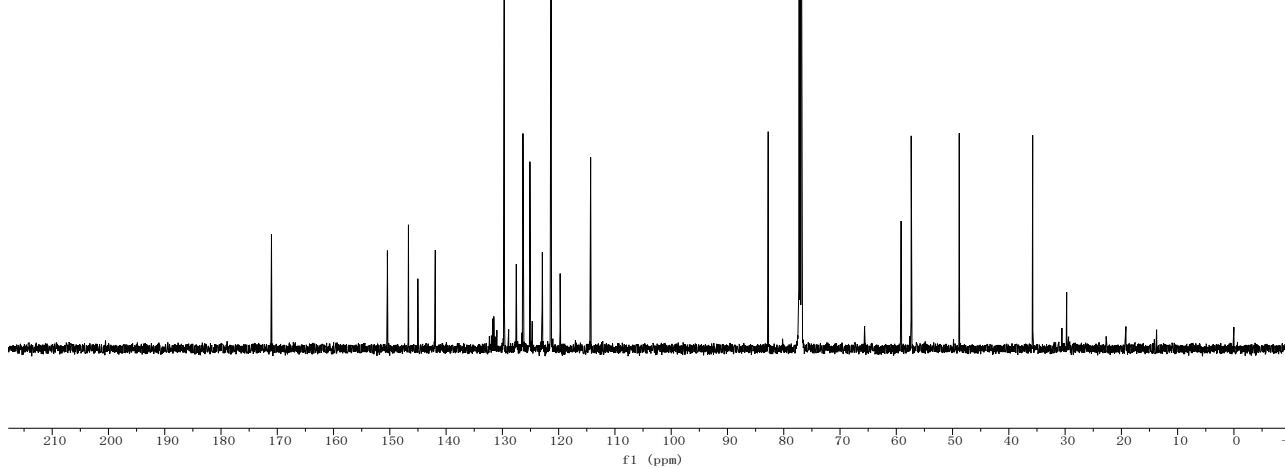

-62.4

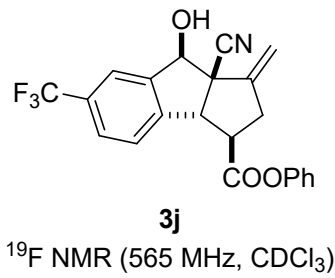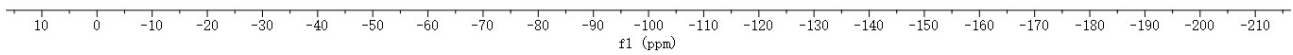

Spectrum from 20230617.wiff2 (sample 75) - 42, +TOF MS (200 - 600) from 0.286 to 0.336 min, noise filter...4 min, noise filtered (noise multiplier = 1.5), Gaussian smoothed (0.5 points), Recalibrated, centroided

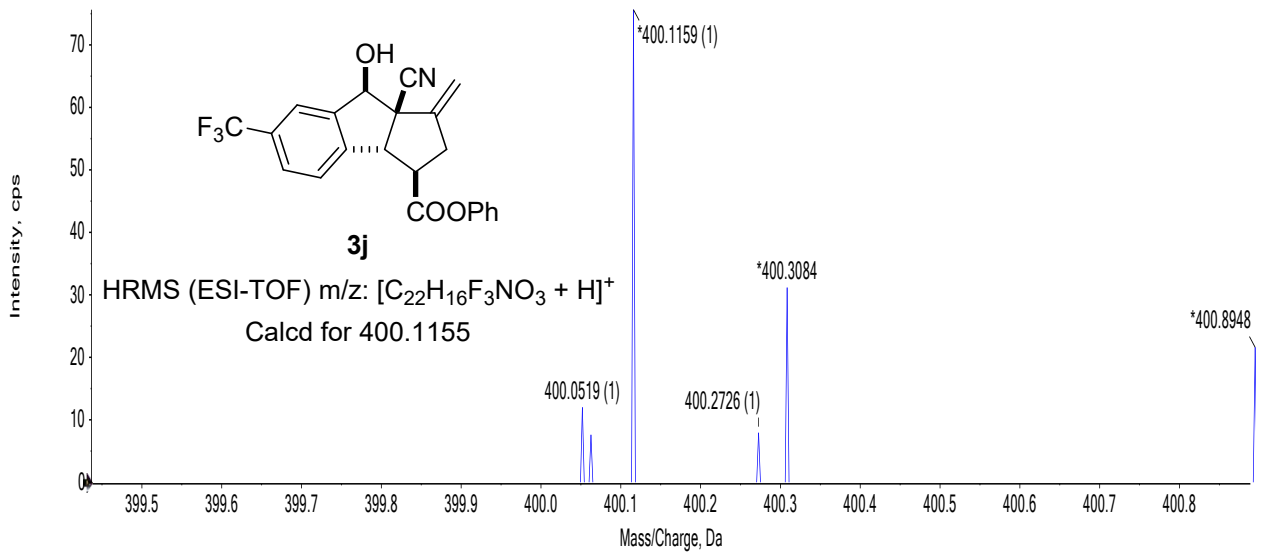



7.752  
7.716  
7.703  
7.534  
7.520  
7.432  
7.419  
7.406  
7.292  
7.280  
7.268  
7.262  
7.156  
7.142  
5.625  
5.440  
5.266  
4.713  
4.706  
3.284  
3.275  
3.268  
3.262  
3.253  
3.185  
3.142  
3.133  
3.114  
3.105  
2.684  
2.671  
2.656  
2.642  
1.630  
-0.000

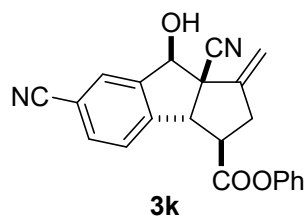

$^1\text{H NMR}$  (600 MHz,  $\text{CDCl}_3$ )

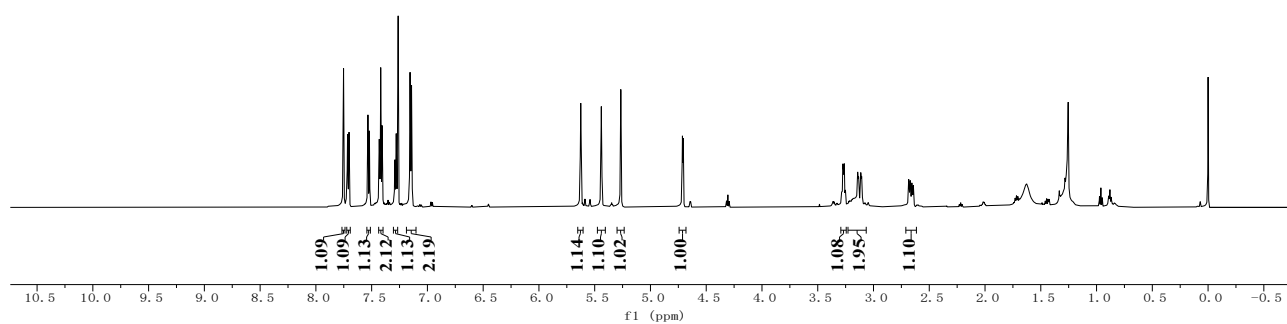

170.941  
150.382  
146.417  
146.250  
142.543  
134.022  
129.719  
129.692  
126.407  
125.598  
121.308  
119.606  
118.231  
114.491  
112.959  
82.361  
77.277  
77.066  
76.855  
58.984  
57.554  
48.677  
35.806

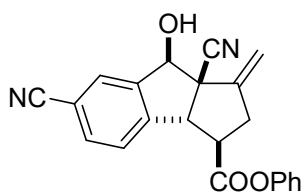

$^{13}\text{C NMR}$  (150 MHz,  $\text{CDCl}_3$ )

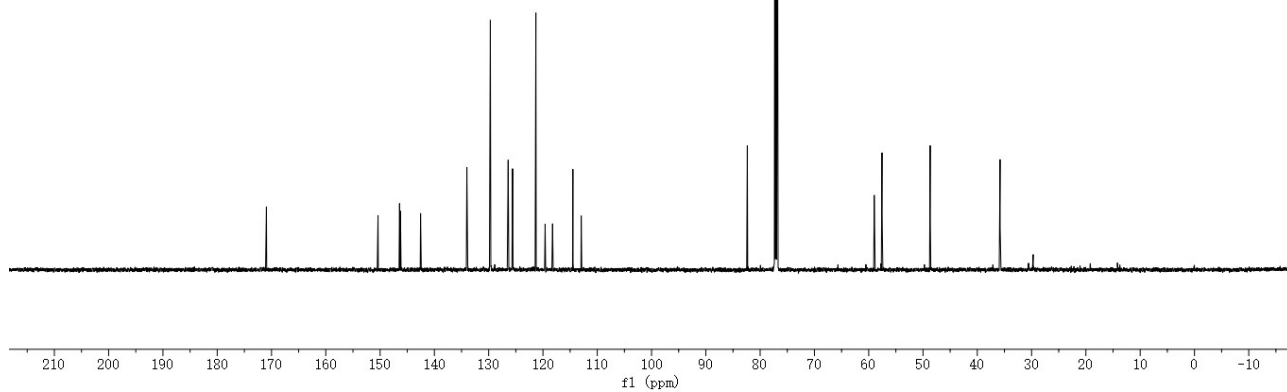

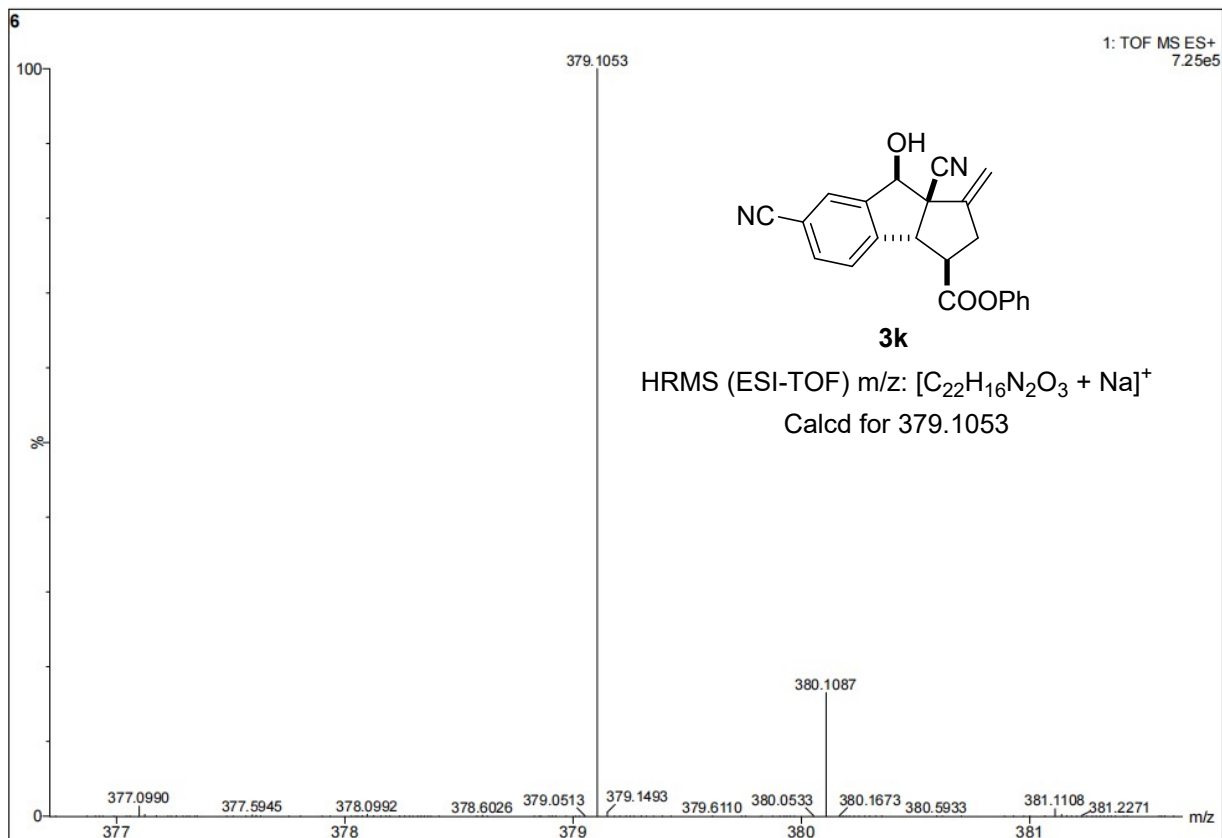

8.262 8.245 7.629 7.616 7.439 7.426 7.413 7.296 7.283 7.271 7.262 7.177 7.163 5.628 5.446 5.292 4.744 4.736 3.339 3.330 3.323 3.317 3.309 3.287 3.159 3.151 3.131 3.123 2.701 2.688 2.673 2.660 1.629 -0.000

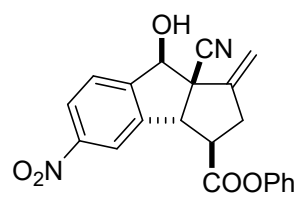

<sup>1</sup>H NMR (600 MHz, CDCl<sub>3</sub>)

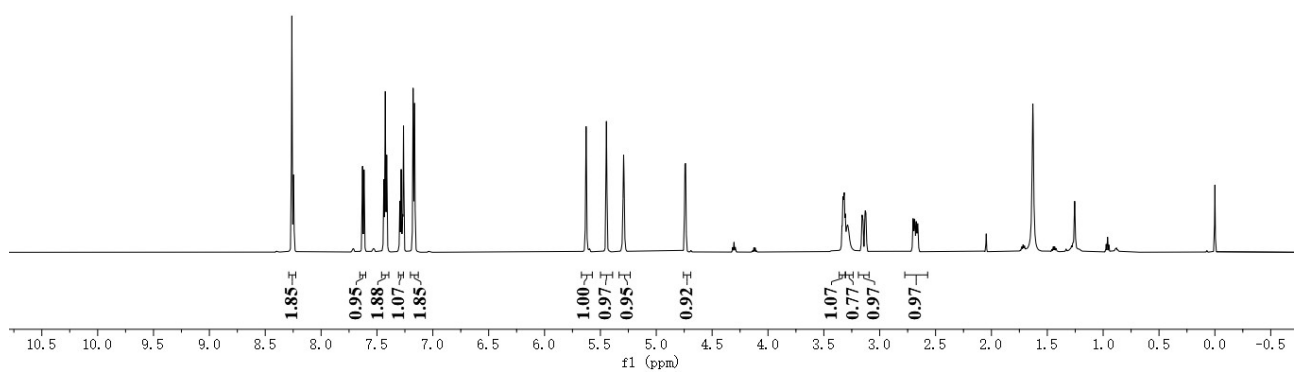

170.709 150.375 149.717 147.572 146.286 142.826 129.701 126.659 126.408 124.610 121.287 120.137 119.321 114.556 82.323 77.251 77.038 76.827 59.476 57.049 48.742 35.871

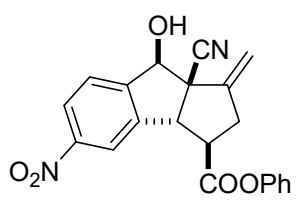

<sup>13</sup>C NMR (150 MHz, CDCl<sub>3</sub>)

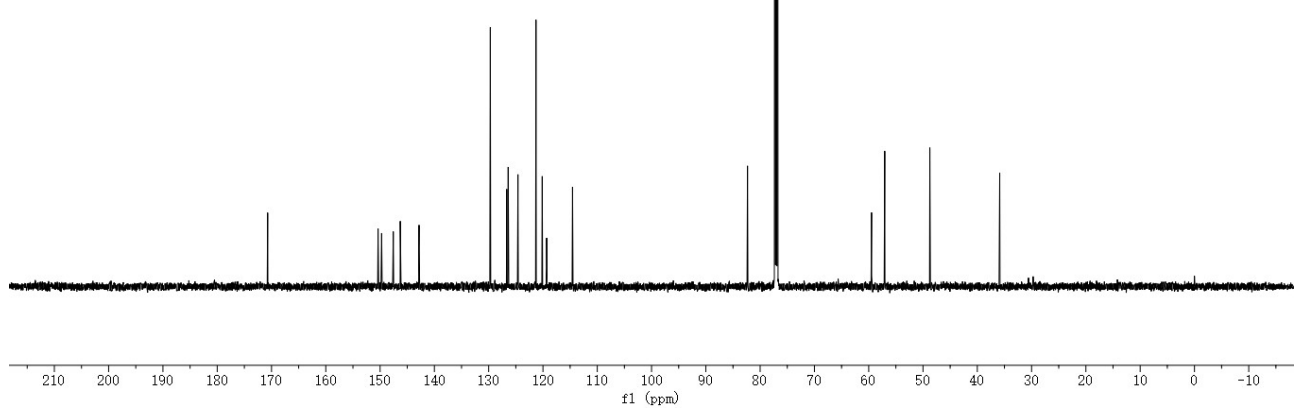

Spectrum from 20230617.wiff2 (sample 77) - 44, +TOF MS (200 - 600) from 0.037 to 0.073 min, noise filtered (noise multiplier = 1.5), Gaussian smoothed (0.5 points), Recalibrated, centroided

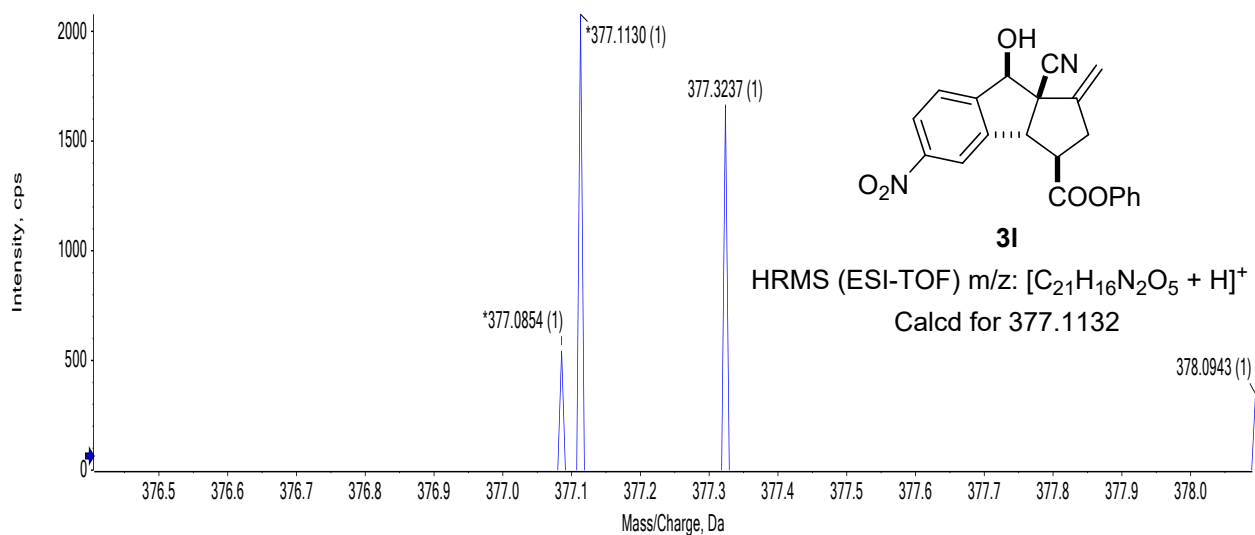

7.416  
7.403  
7.389  
7.271  
7.259  
7.247  
7.234  
7.230  
7.218  
7.176  
7.163  
7.094  
7.088  
7.080  
7.074  
5.615  
5.434  
5.418  
4.748  
3.360  
3.339  
3.334  
3.330  
3.326  
3.321  
3.317  
3.068  
3.040  
2.470  
2.466  
2.461  
2.457  
2.452  
2.448  
2.442  
2.438  
2.433  
2.429  
2.424  
2.420  
-0.000

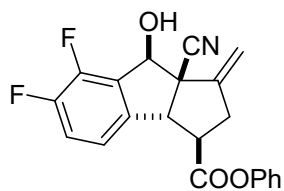

**3m**

$^1\text{H NMR}$  (600 MHz,  $\text{CDCl}_3$ )

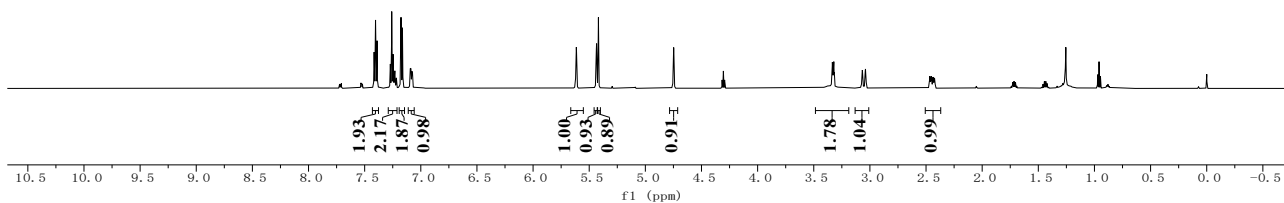

171.055  
151.205  
151.128  
150.477  
149.551  
149.472  
148.258  
148.167  
146.843  
146.567  
146.474  
139.041  
130.228  
130.141  
129.624  
126.278  
121.382  
120.270  
120.146  
119.879  
119.856  
119.806  
119.679  
114.979  
79.905  
77.267  
77.054  
76.842  
58.482  
57.346  
48.792  
34.714

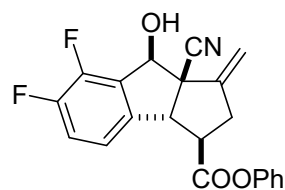

**3m**

$^{13}\text{C NMR}$  (150 MHz,  $\text{CDCl}_3$ )

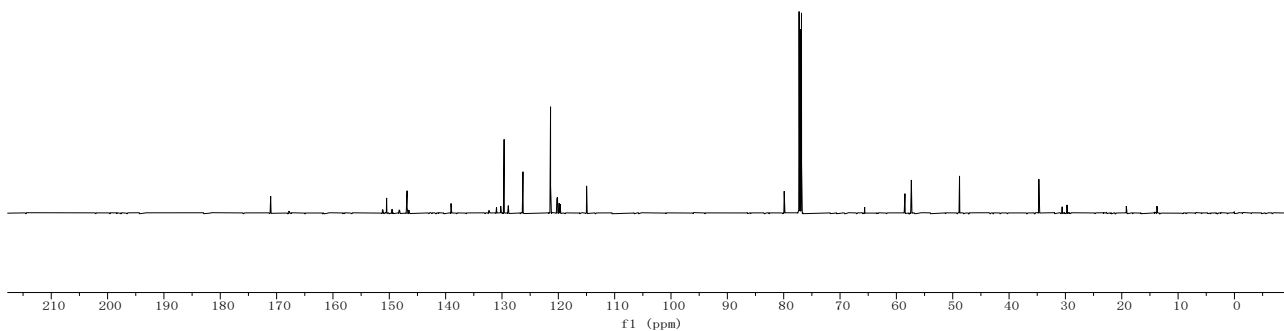

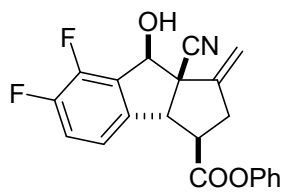

**3m**

$^{19}\text{F}$  NMR (565 MHz,  $\text{CDCl}_3$ )

~ -138.0  
~ -141.3

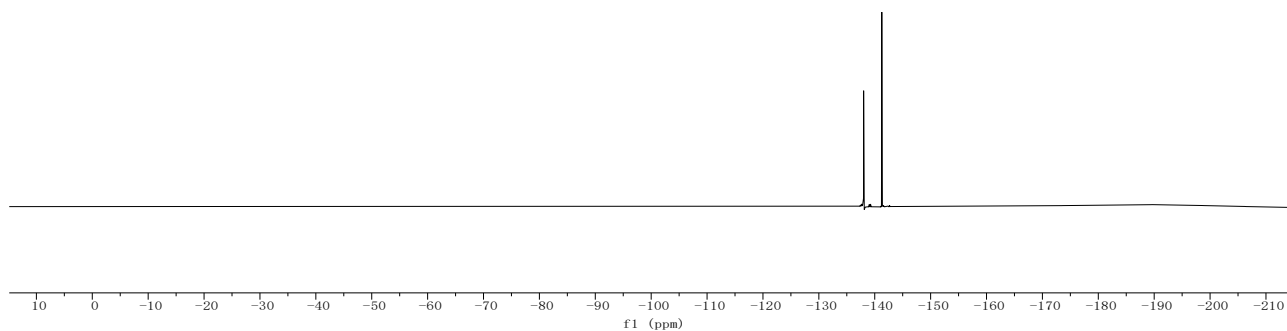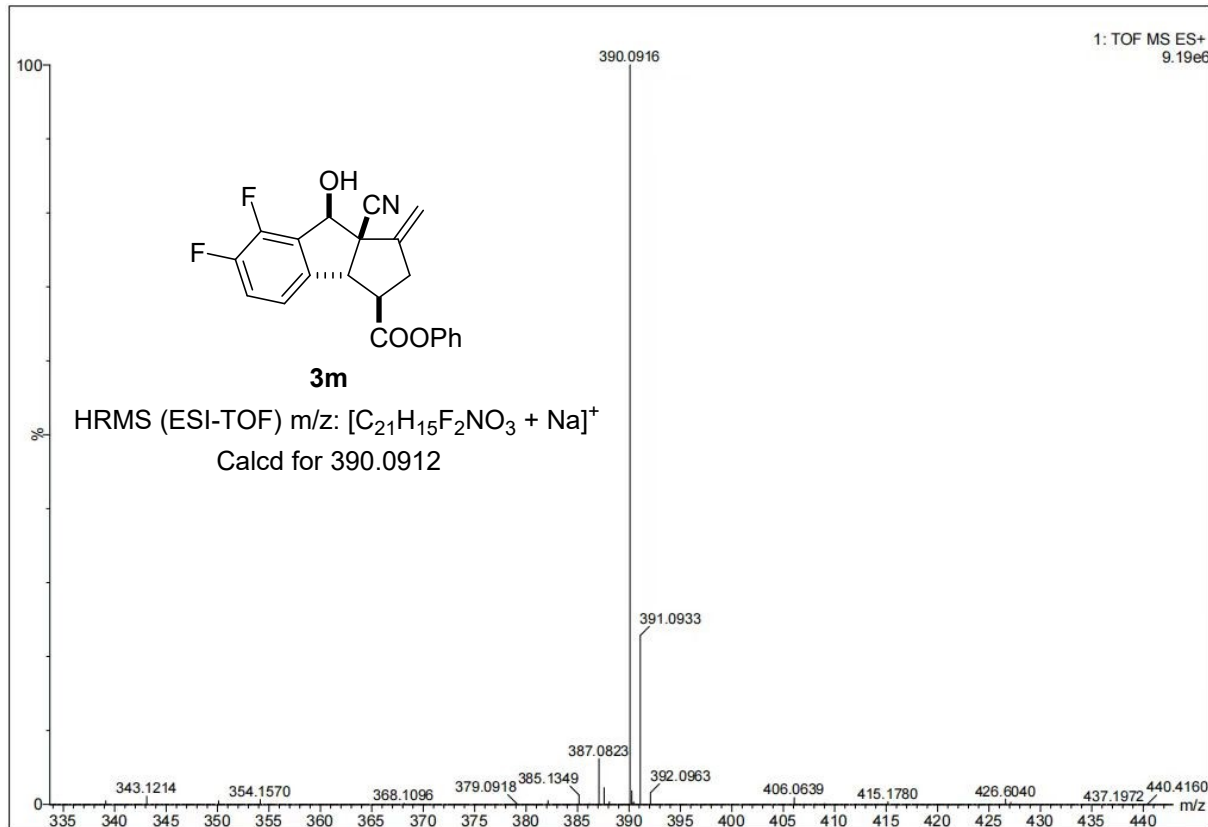

8.290  
8.239  
8.235  
8.225  
8.221  
7.404  
7.390  
7.266  
6.012  
5.659  
5.655  
5.348  
5.345  
4.661  
4.658  
4.654  
4.639  
4.635  
4.632  
4.149  
4.145  
4.140  
4.126  
4.122  
4.118  
4.078  
4.067  
4.055  
3.757  
3.101  
3.089  
3.072  
3.061  
2.828  
2.816  
2.799  
2.788  
1.585  
0.000

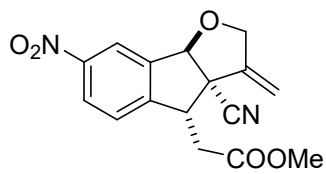

**4a**

<sup>1</sup>H NMR (600 MHz, CDCl<sub>3</sub>)

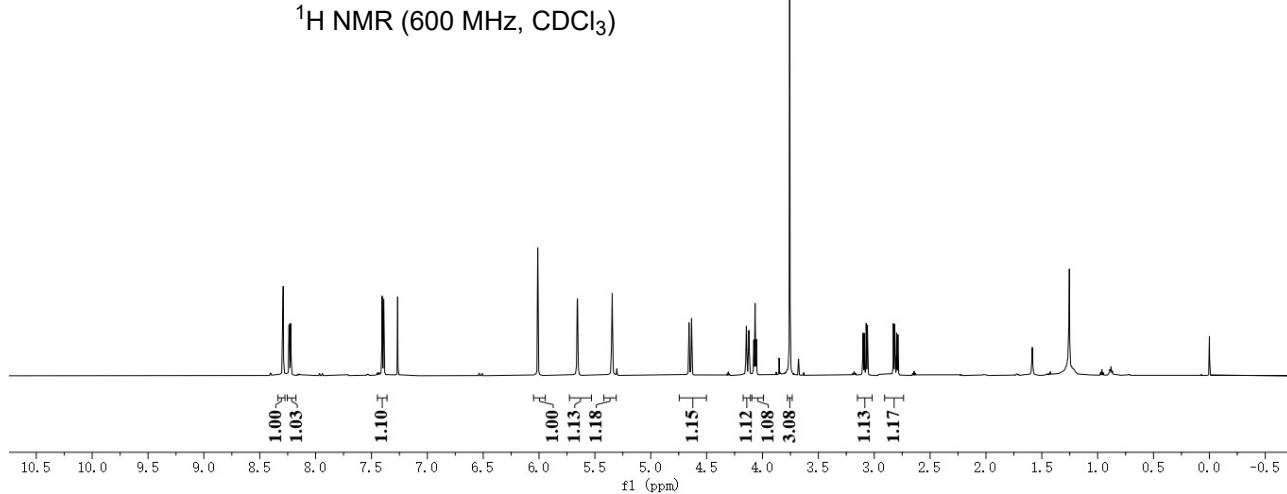

171.026  
149.161  
148.872  
147.897  
140.413  
125.657  
125.519  
121.091  
118.917  
111.405  
90.435  
77.253  
77.045  
76.830  
70.514  
54.413  
52.334  
49.596  
38.421

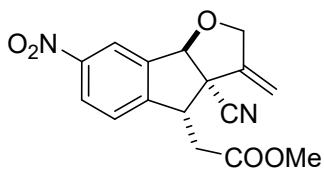

**4a**

<sup>13</sup>C NMR (150 MHz, CDCl<sub>3</sub>)

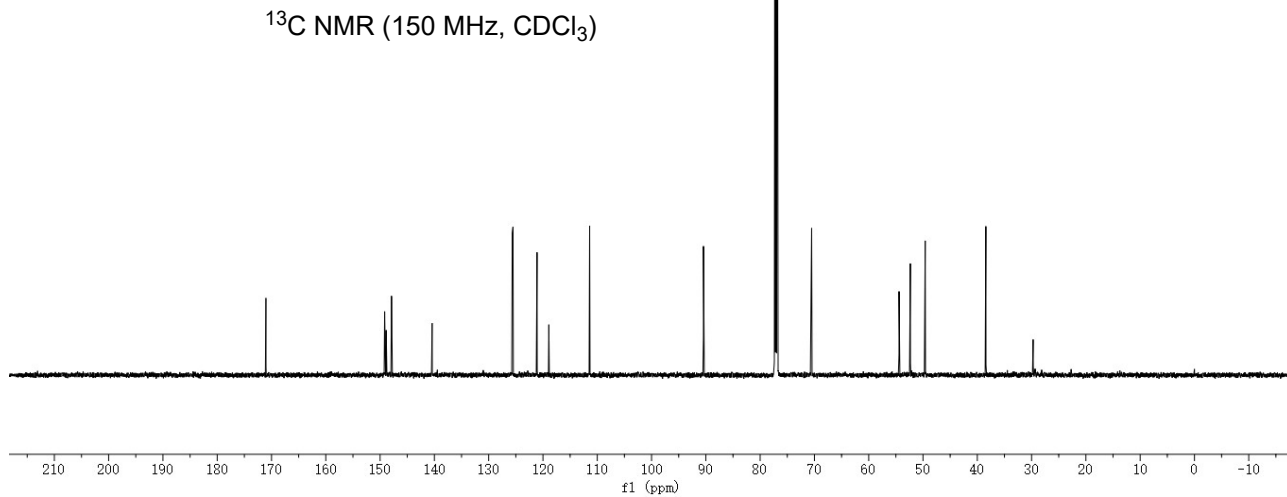

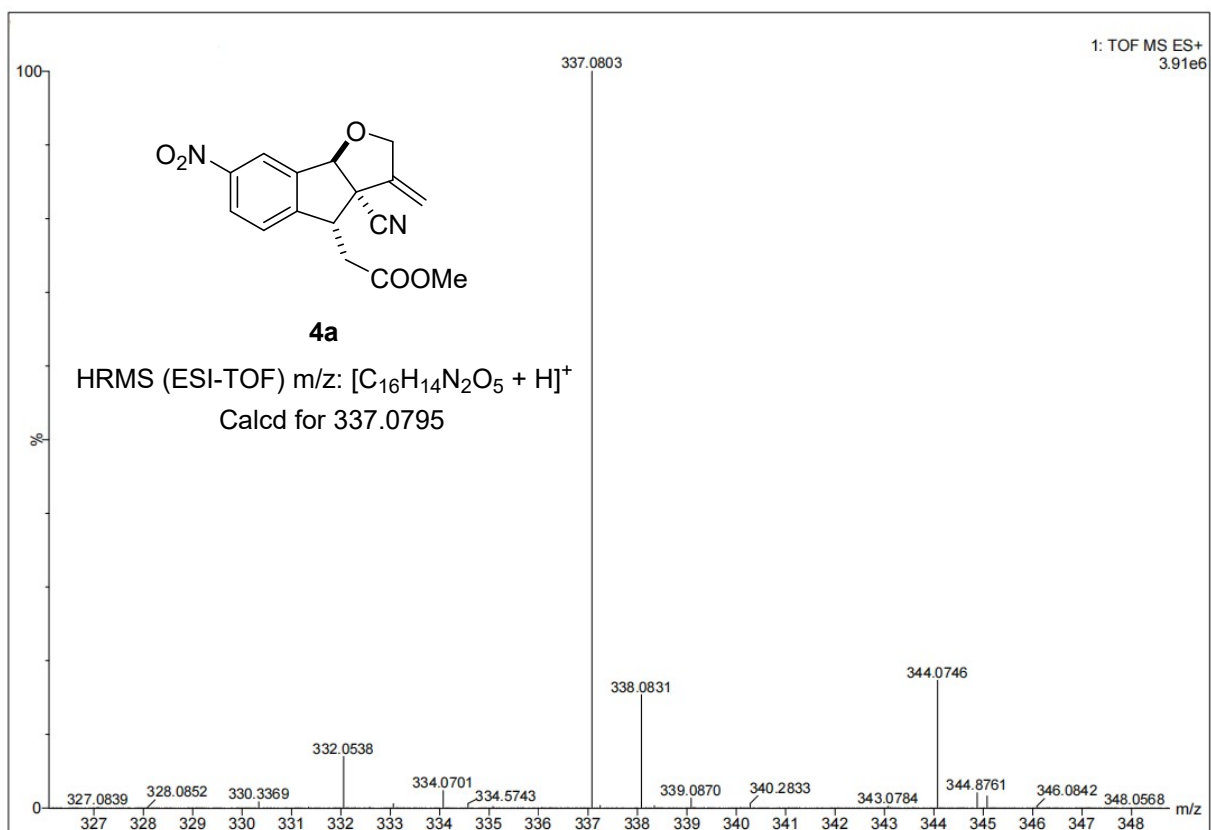



8.291  
8.238  
8.235  
8.224  
8.221  
7.411  
7.397  
7.267  
6.012  
5.664  
5.346  
4.659  
4.636  
4.243  
4.237  
4.232  
4.225  
4.221  
4.213  
4.209  
4.201  
4.197  
4.191  
4.142  
4.120  
4.080  
4.068  
4.057  
3.087  
3.075  
3.058  
3.046  
2.809  
2.798  
2.780  
2.769  
1.611  
1.296  
1.284  
0.000

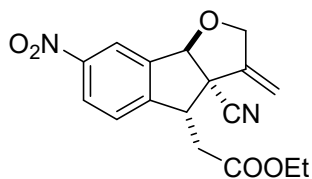

**4b**

<sup>1</sup>H NMR (600 MHz, CDCl<sub>3</sub>)

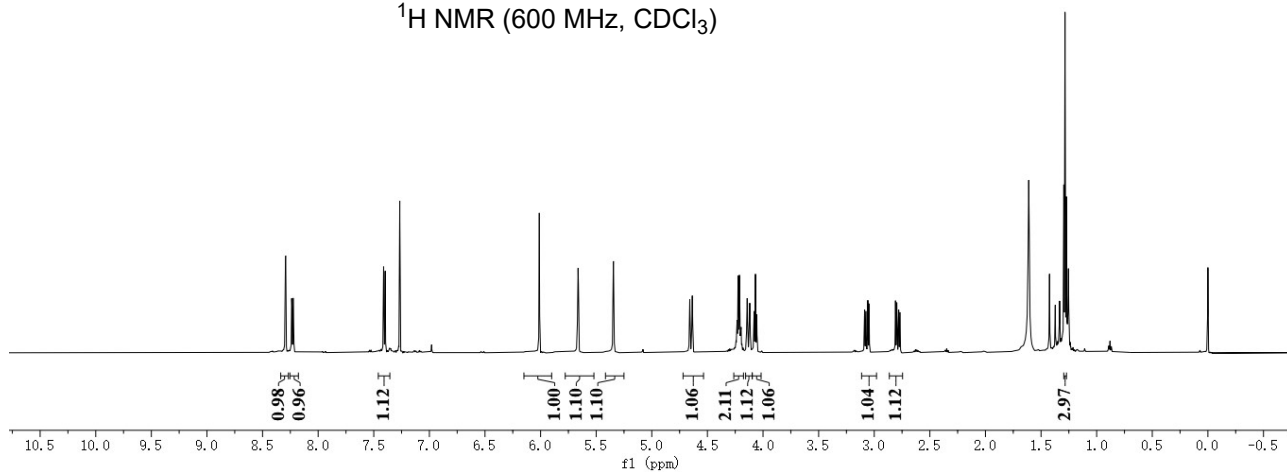

170.557  
149.291  
148.858  
147.933  
140.400  
125.681  
125.490  
121.077  
118.959  
111.390  
90.457  
77.247  
77.036  
76.825  
70.513  
61.477  
54.413  
49.622  
38.693  
14.142

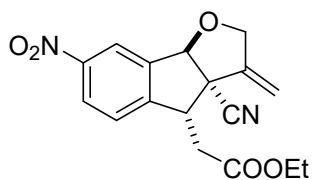

**4b**

<sup>13</sup>C NMR (150 MHz, CDCl<sub>3</sub>)

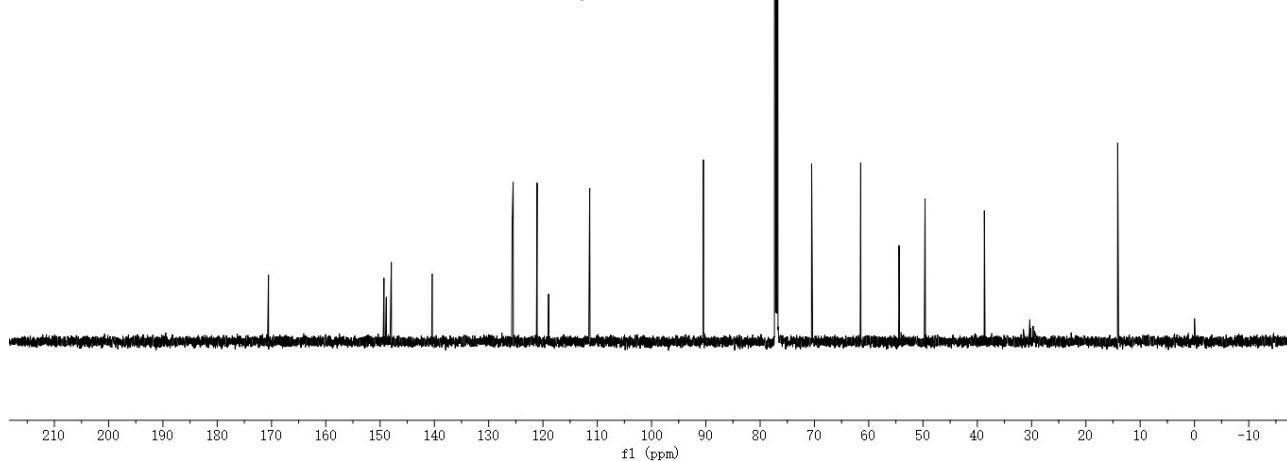

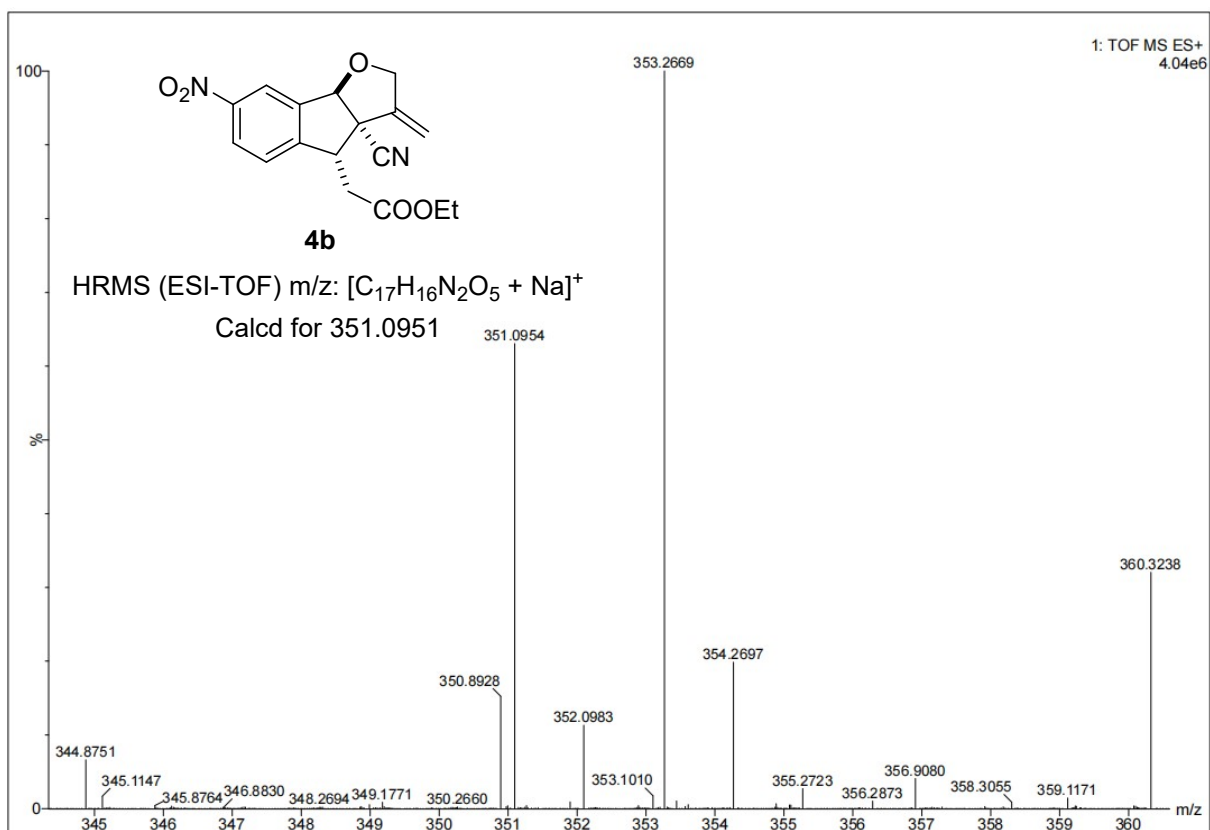

8.240  
8.147  
8.144  
8.133  
8.129  
7.367  
7.358  
7.340  
7.335  
7.328  
7.294  
7.280  
7.262  
5.973  
5.612  
5.317  
5.209  
5.189  
5.155  
5.135  
4.642  
4.620  
4.115  
4.092  
4.063  
4.052  
4.041  
3.141  
3.130  
3.113  
3.102  
2.858  
2.846  
2.829  
2.817  
1.592

—0.000

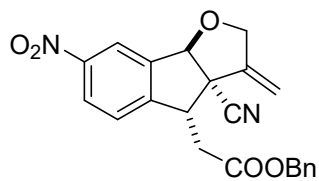

**4c**

<sup>1</sup>H NMR (600 MHz, CDCl<sub>3</sub>)

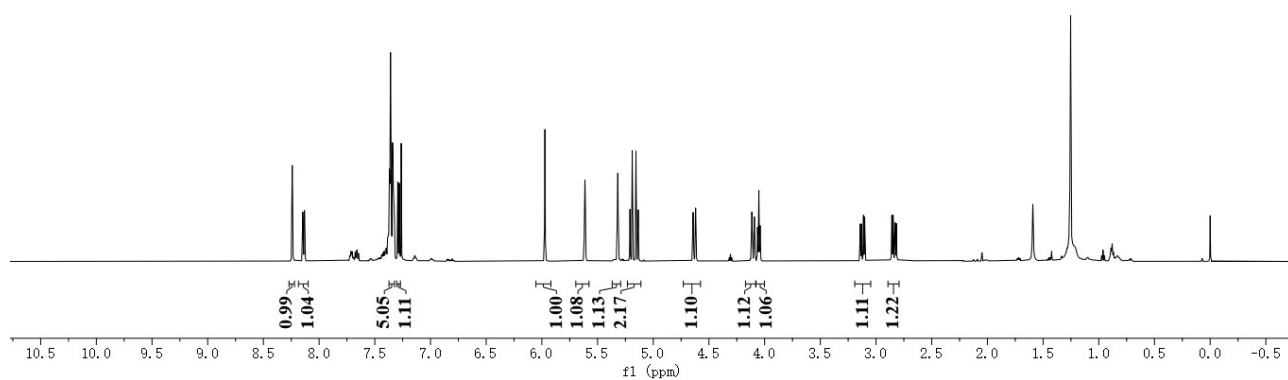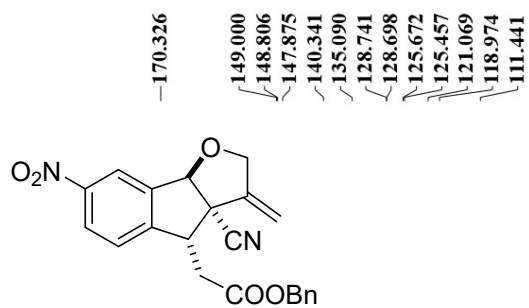

**4c**

<sup>13</sup>C NMR (150 MHz, CDCl<sub>3</sub>)

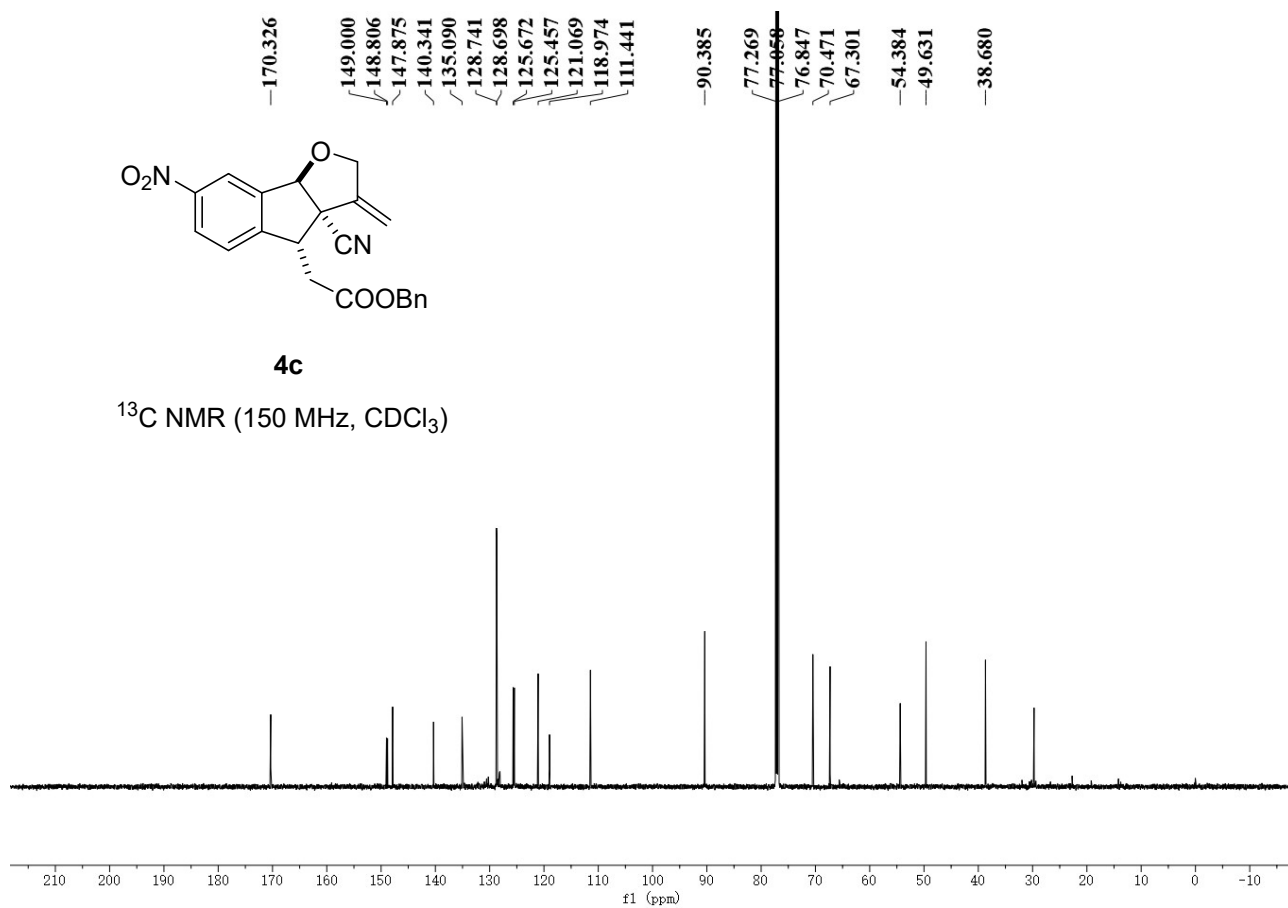

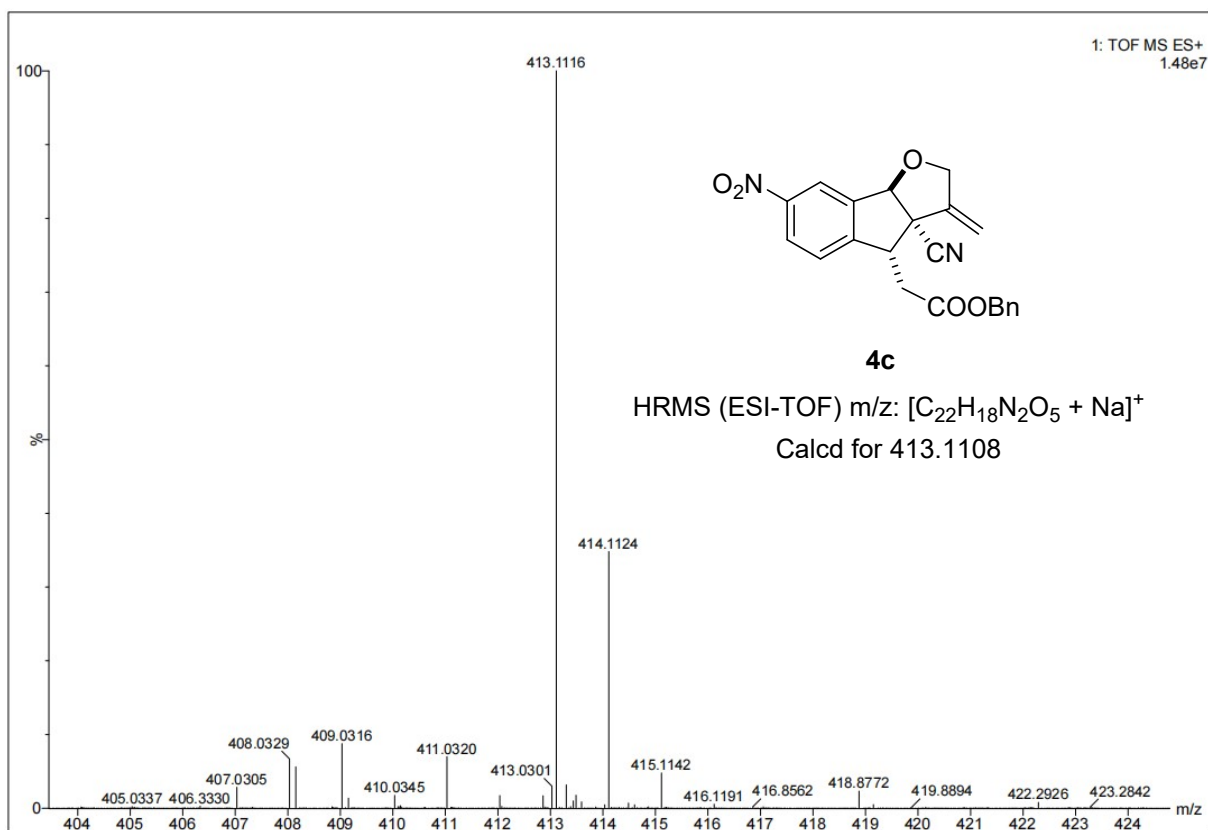

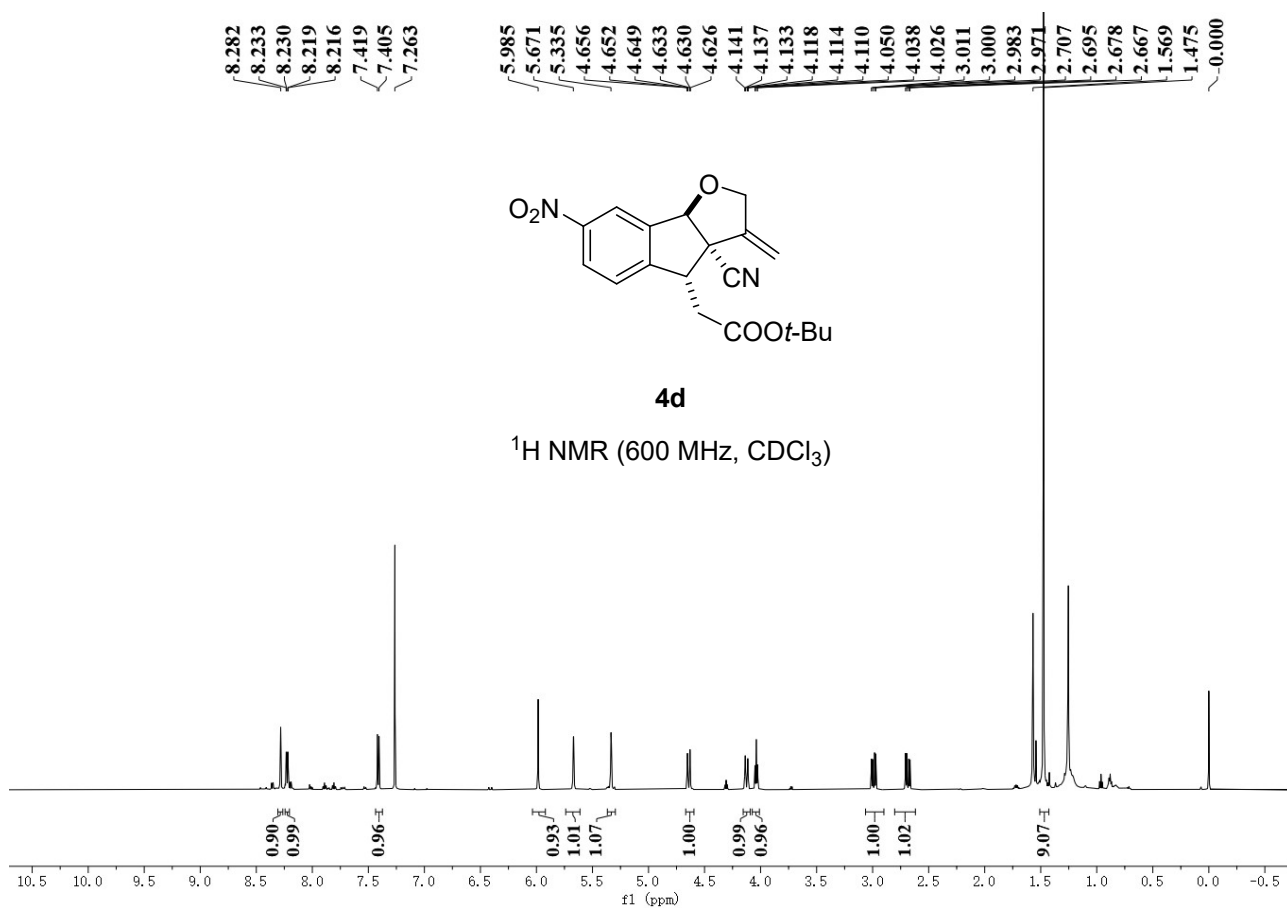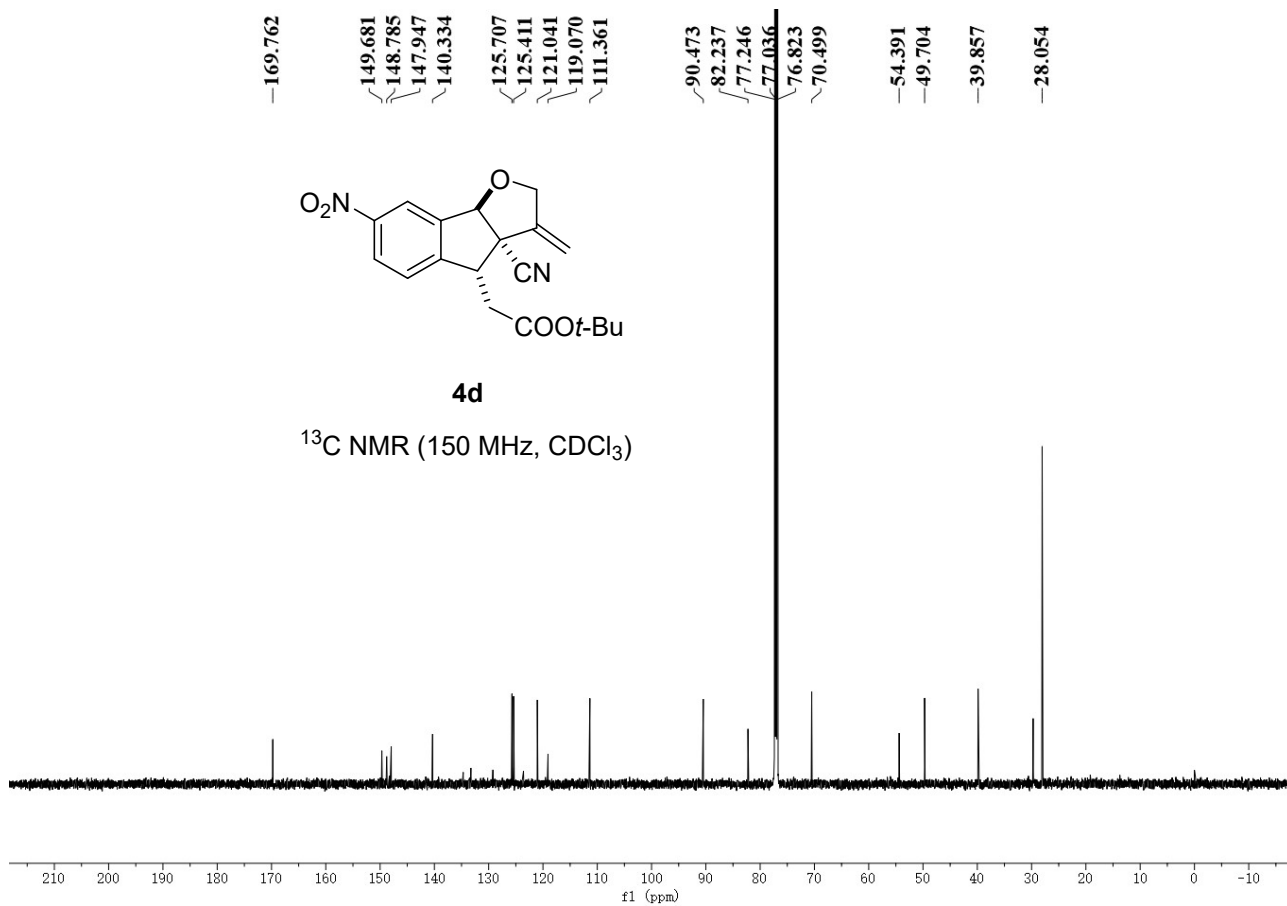

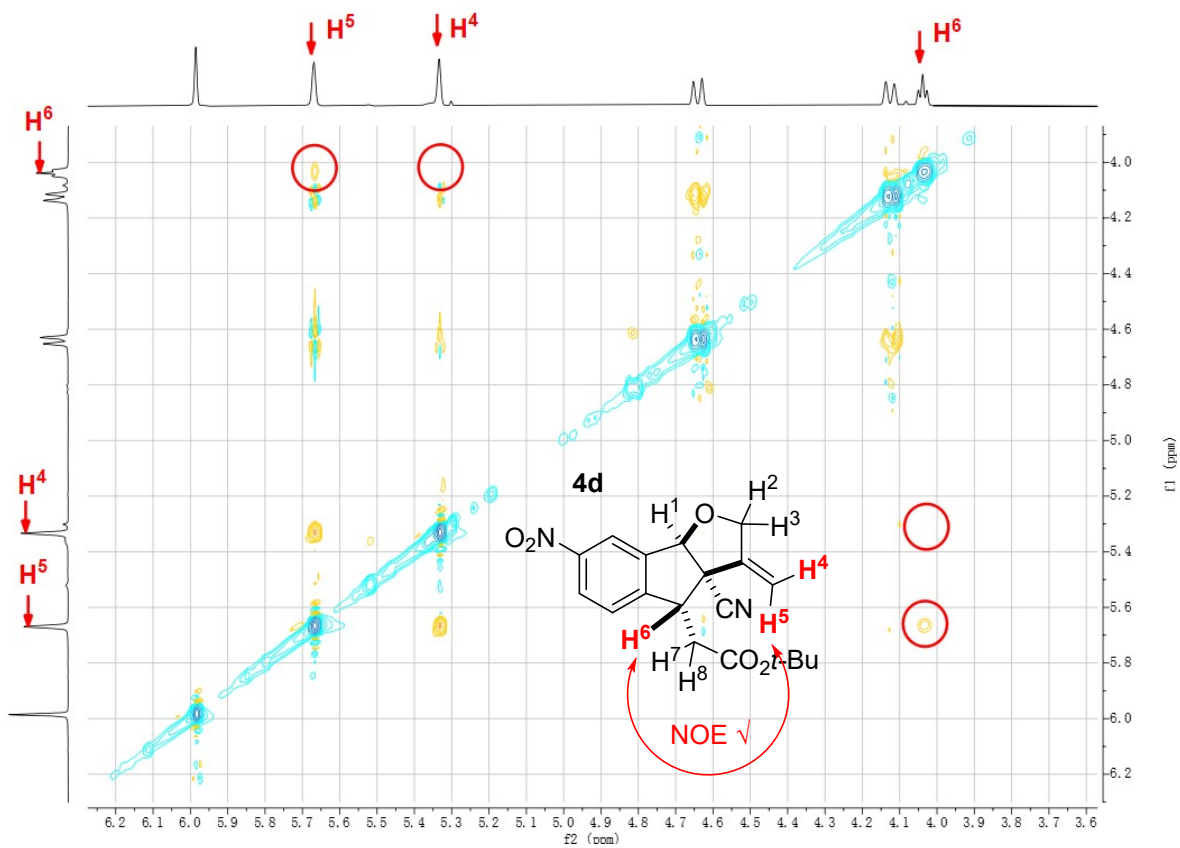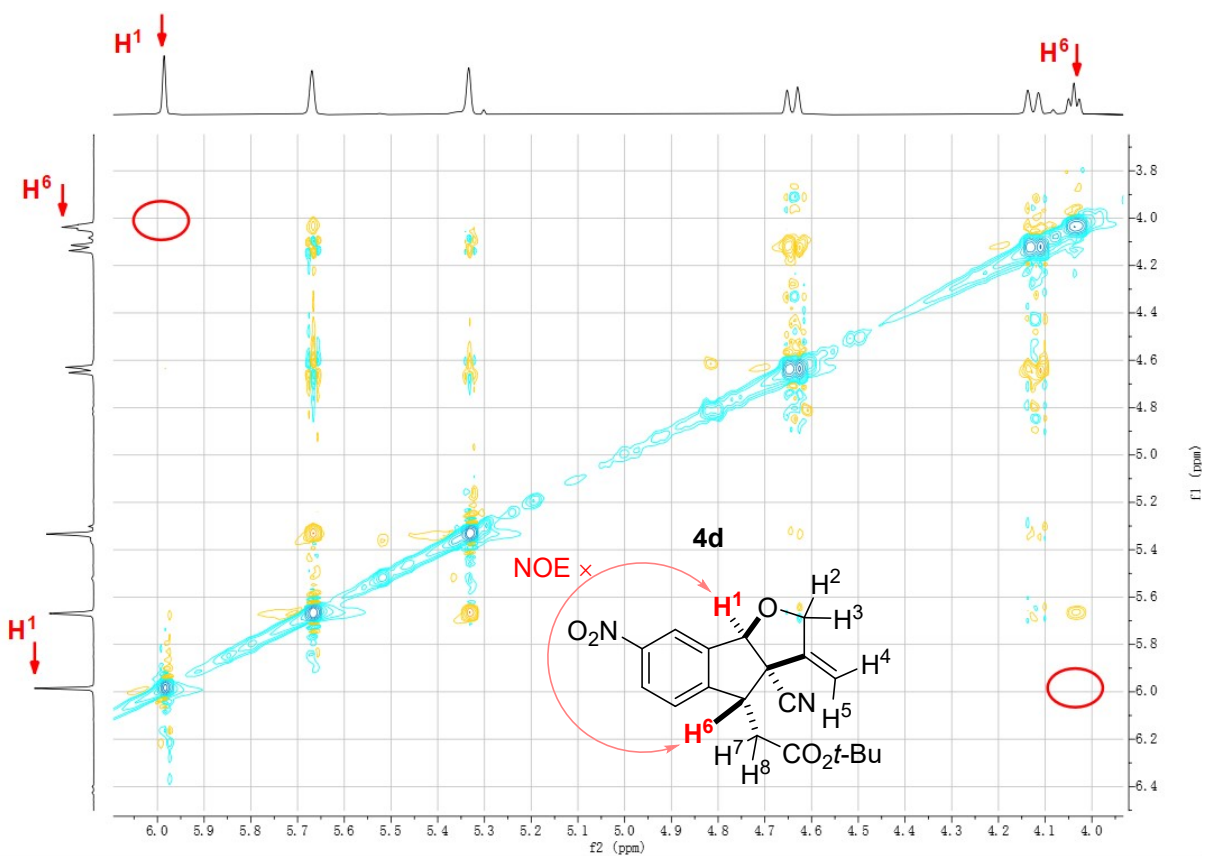

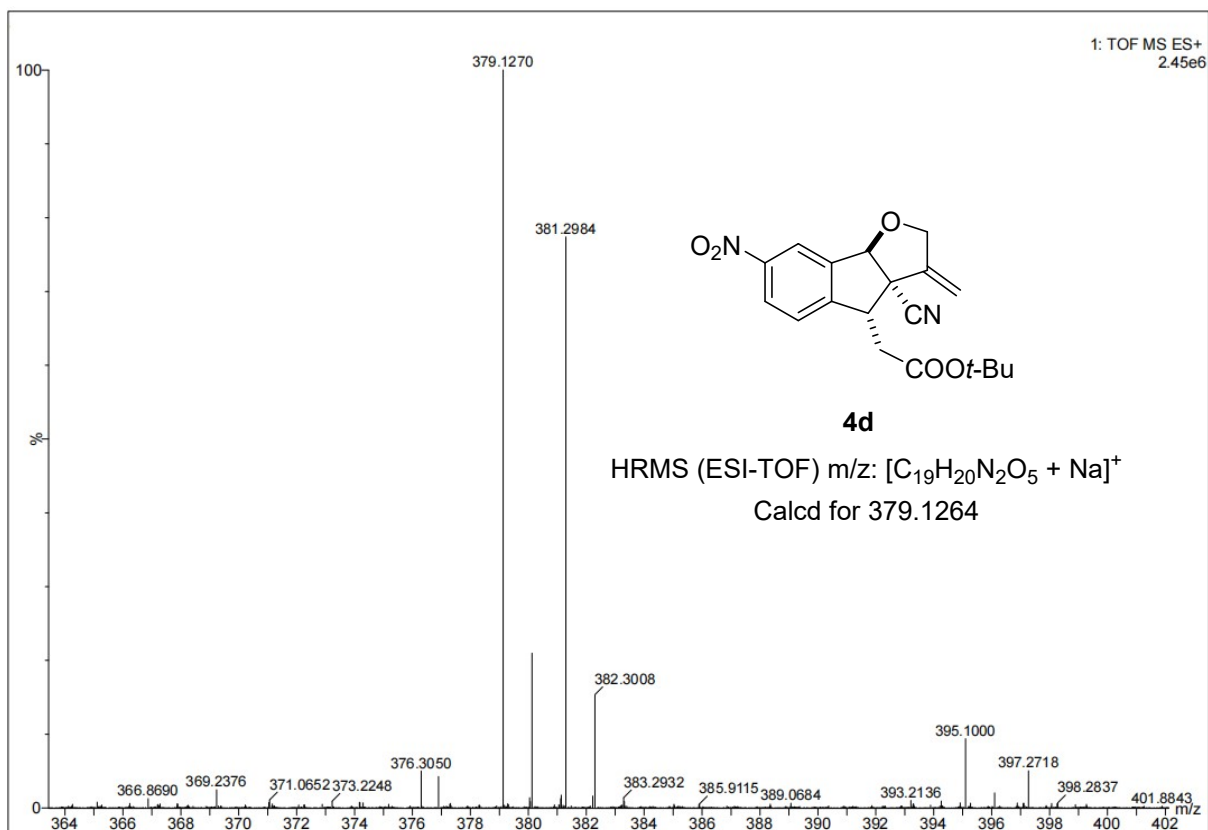

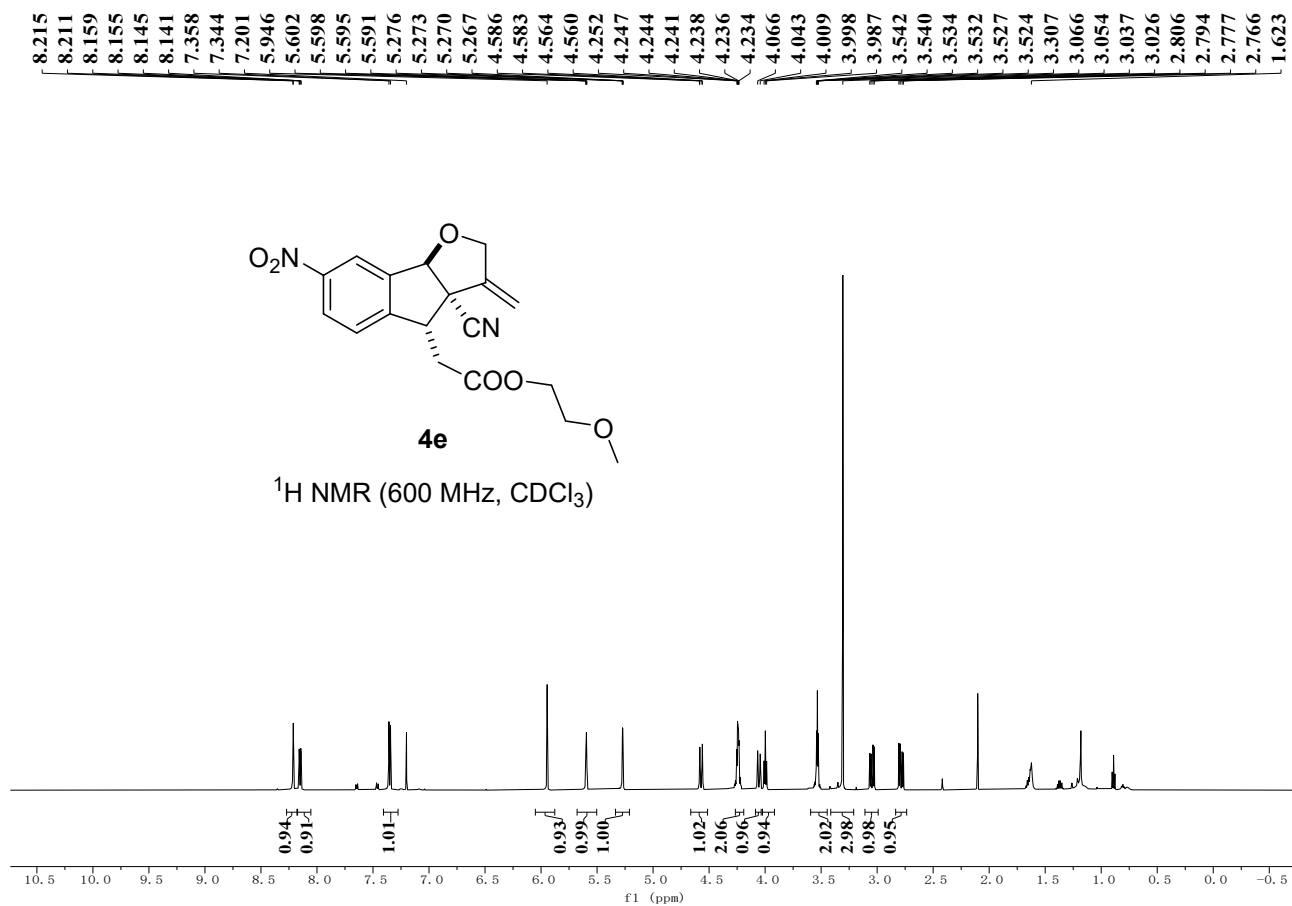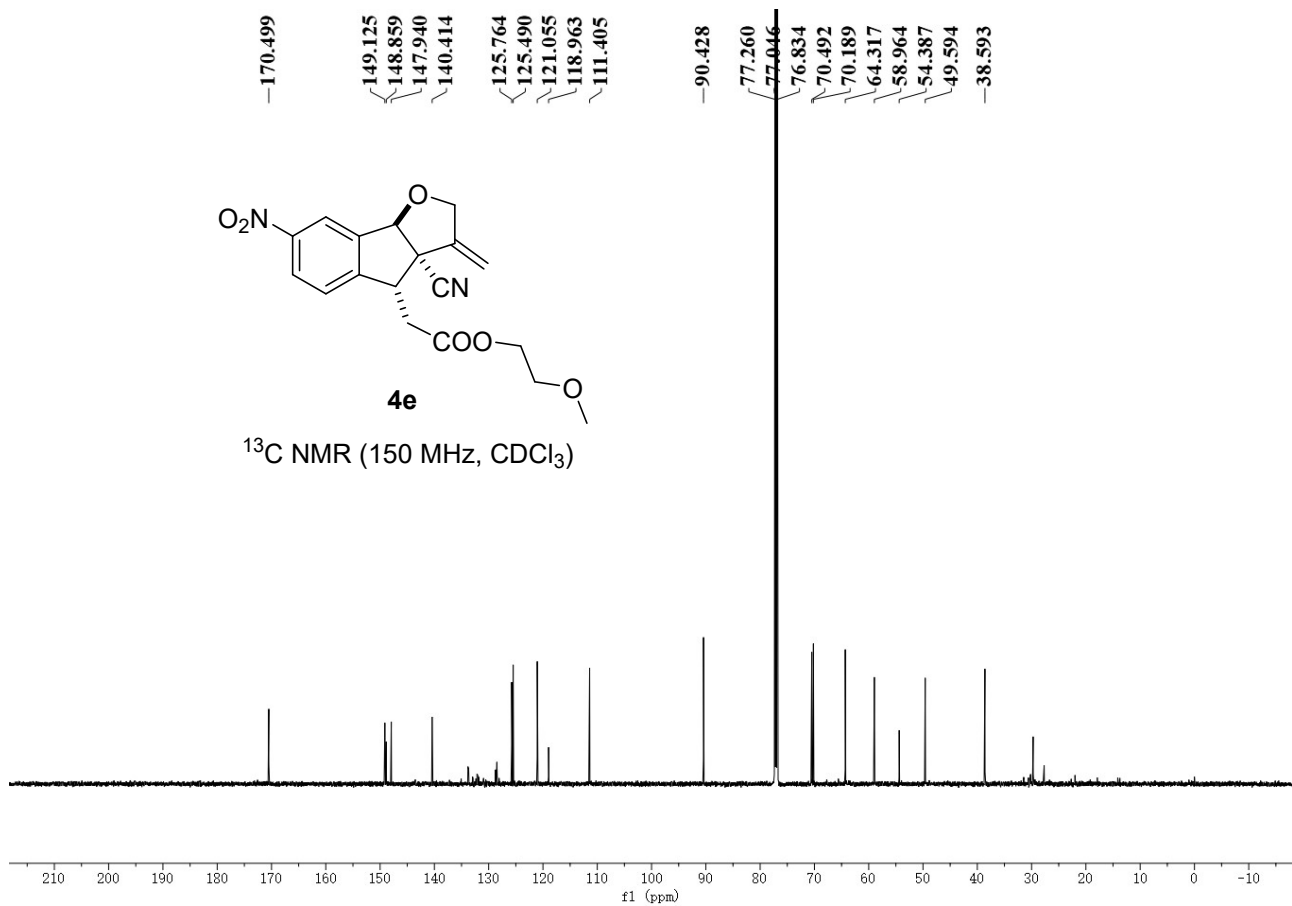



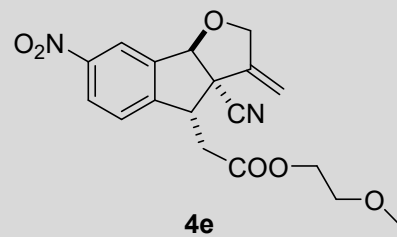

**4e**  
HRMS (ESI-TOF) m/z: [C<sub>18</sub>H<sub>18</sub>N<sub>2</sub>O<sub>6</sub> + Na]<sup>+</sup>  
Calcd for 381.1057

8.303  
8.268  
8.265  
8.254  
8.251  
7.478  
7.464  
7.411  
7.398  
7.385  
7.276  
7.264  
7.260  
7.251  
7.111  
7.098  
6.078  
5.698  
5.695  
5.355  
5.352  
4.666  
4.663  
4.659  
4.643  
4.640  
4.636  
4.174  
4.163  
4.151  
4.131  
4.127  
4.122  
4.108  
4.104  
4.100  
3.333  
3.321  
3.304  
3.291  
3.128  
3.118  
3.099  
3.089  
-0.000

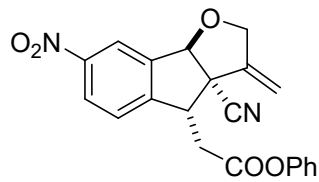

**4f**

$^1\text{H}$  NMR (600 MHz,  $\text{CDCl}_3$ )

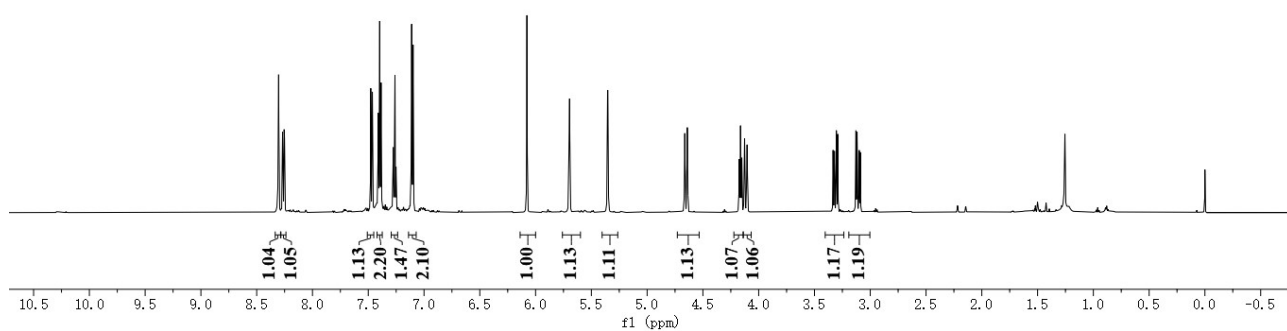

-169.516  
150.309  
148.995  
148.786  
147.912  
140.608  
129.665  
126.393  
125.670  
125.592  
121.438  
121.192  
119.220  
111.701  
-90.640  
77.270  
77.058  
76.848  
70.391  
-54.189  
-49.920  
-38.868

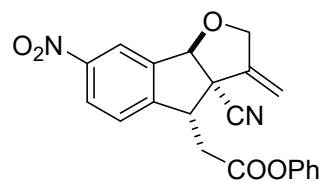

**4f**

$^{13}\text{C}$  NMR (150 MHz,  $\text{CDCl}_3$ )

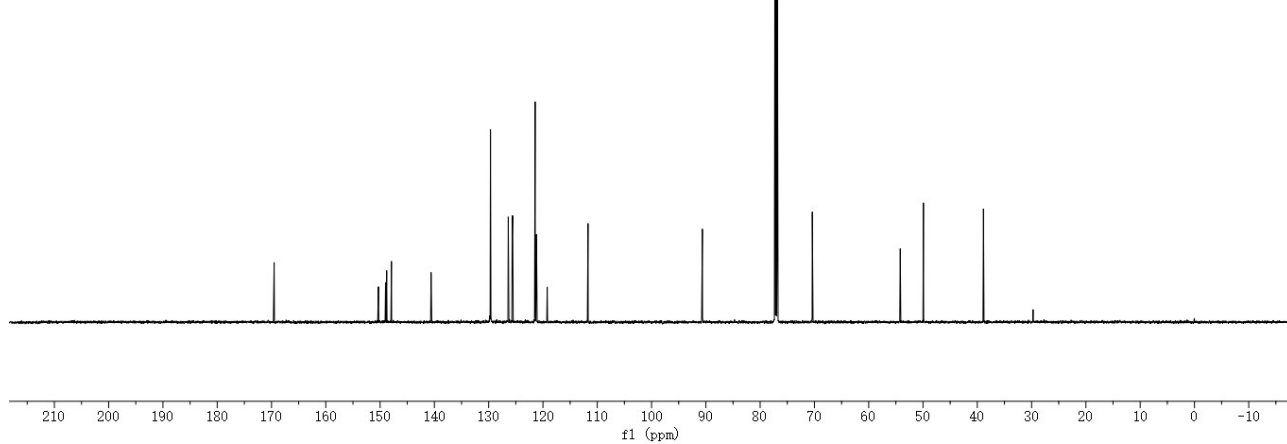

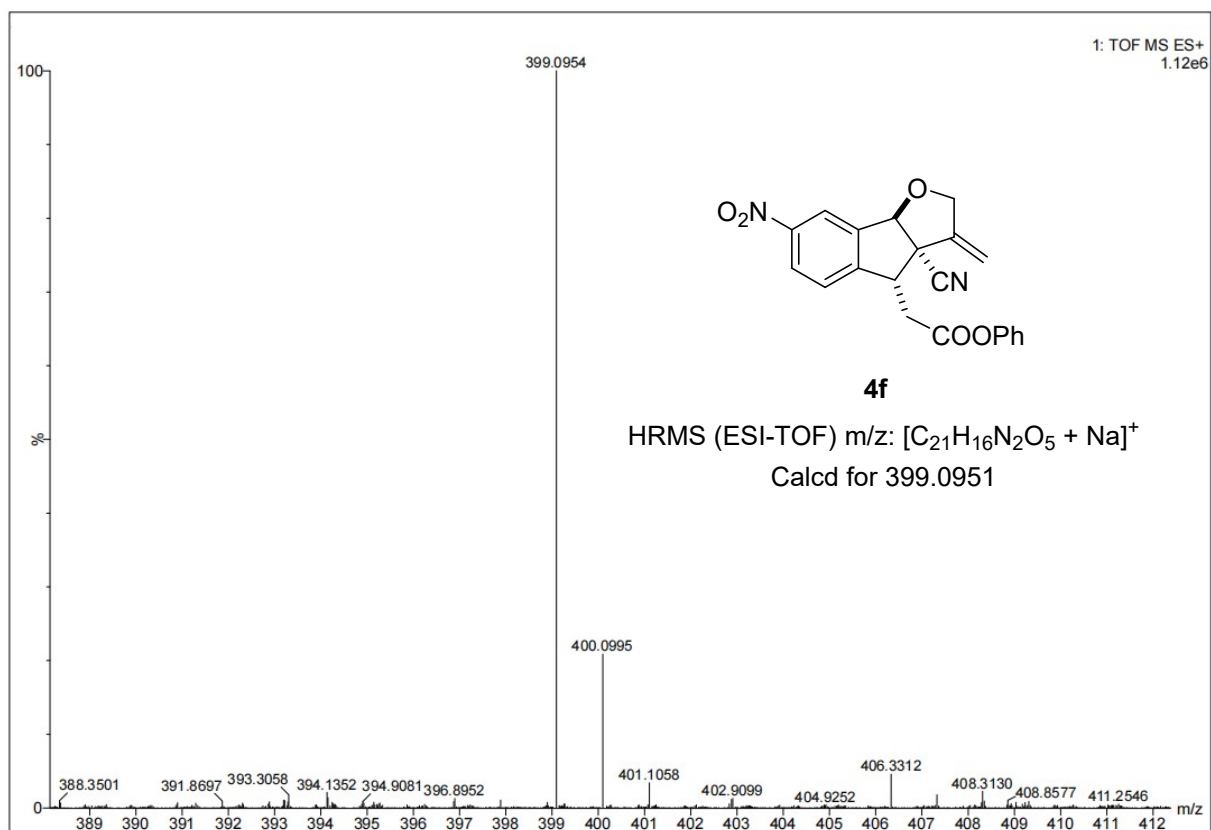

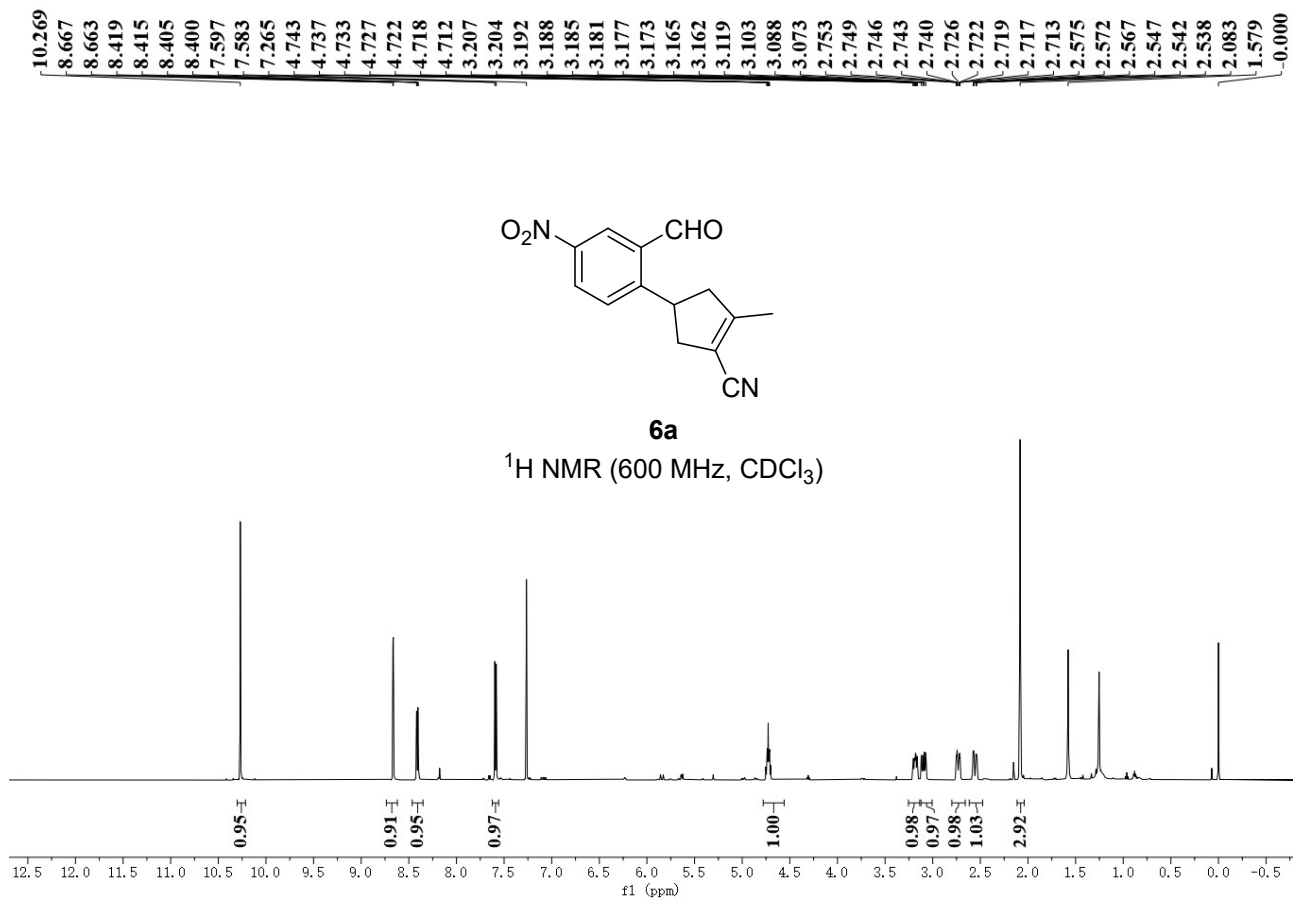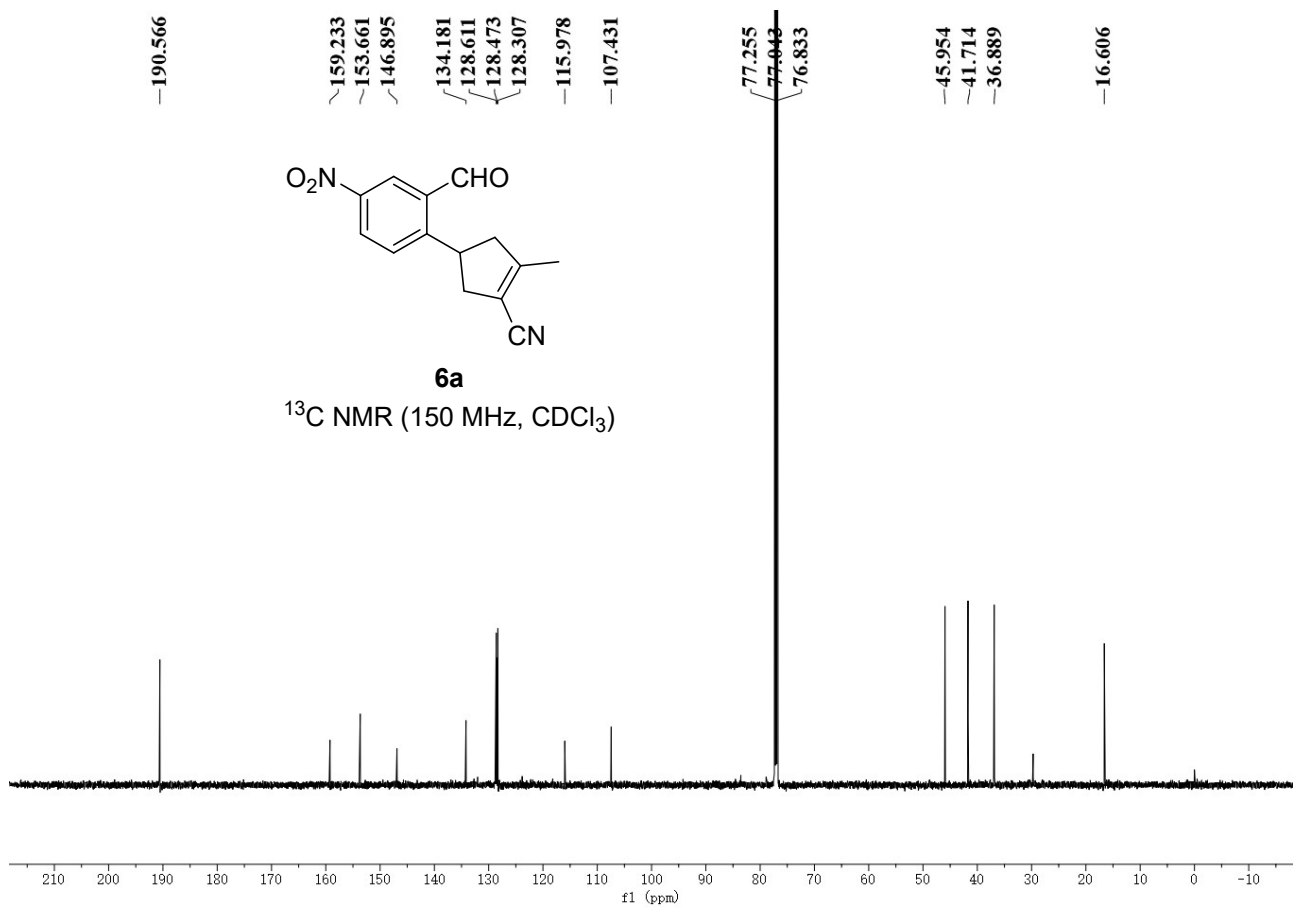

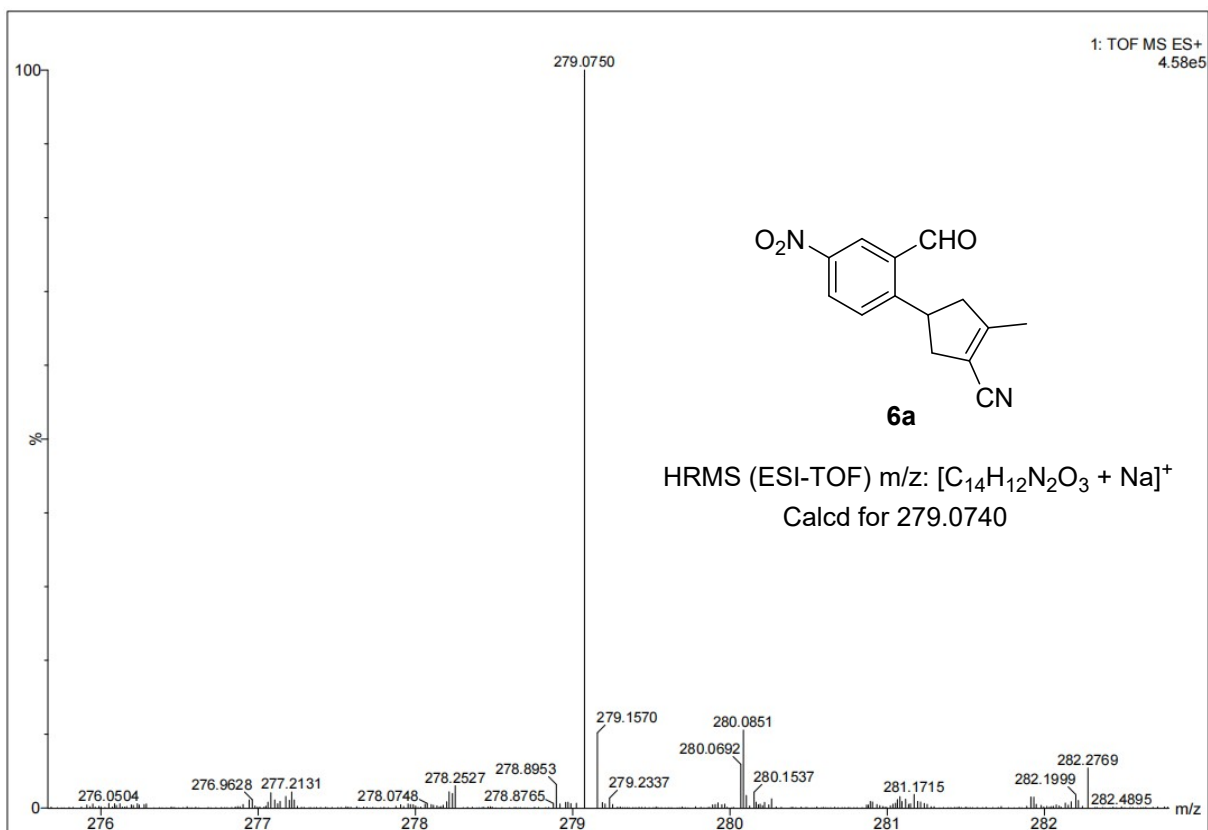

10.167  
8.450  
7.334  
7.266  
4.715  
4.704  
4.699  
4.694  
4.689  
4.684  
4.679  
4.674  
4.664  
3.169  
3.165  
3.153  
3.150  
3.146  
3.142  
3.139  
3.127  
3.123  
3.088  
3.073  
3.057  
3.042  
2.754  
2.751  
2.747  
2.744  
2.740  
2.737  
2.724  
2.722  
2.714  
2.556  
2.528  
2.518  
2.078  
1.587  
-0.000

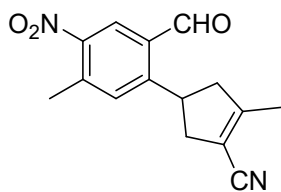

**6b**

<sup>1</sup>H NMR (600 MHz, CDCl<sub>3</sub>)

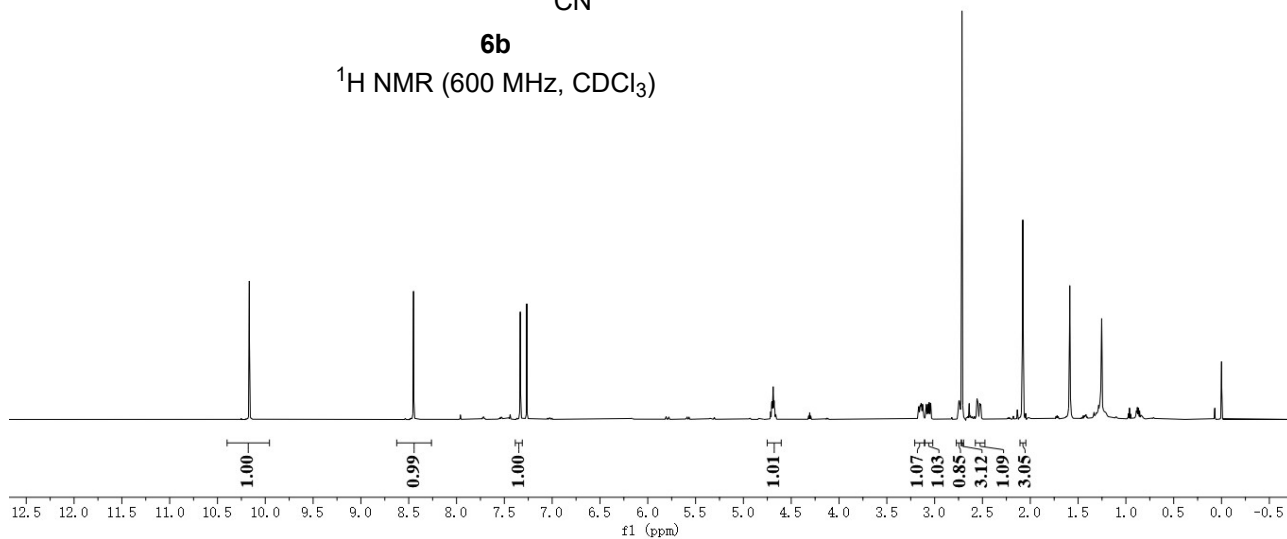

-190.442

-159.310  
-151.533  
-147.600  
-140.174  
-132.309  
-132.049  
-130.603  
-116.121  
-107.395

77.255  
77.043  
76.833

-45.875  
-41.497  
-36.680

-21.265  
-16.635

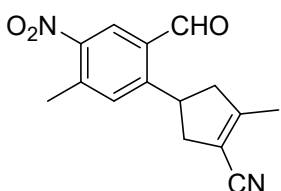

**6b**

<sup>13</sup>C NMR (150 MHz, CDCl<sub>3</sub>)

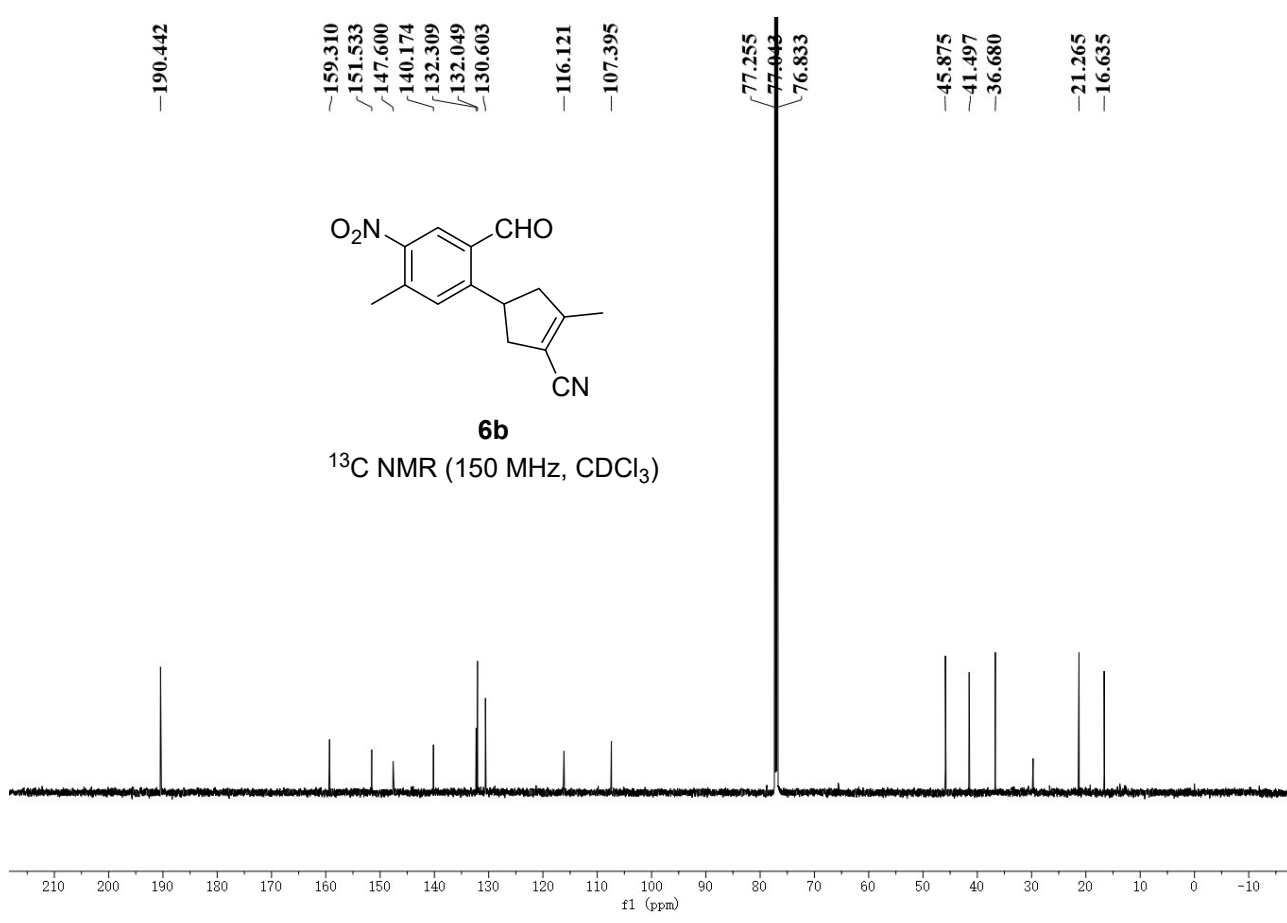

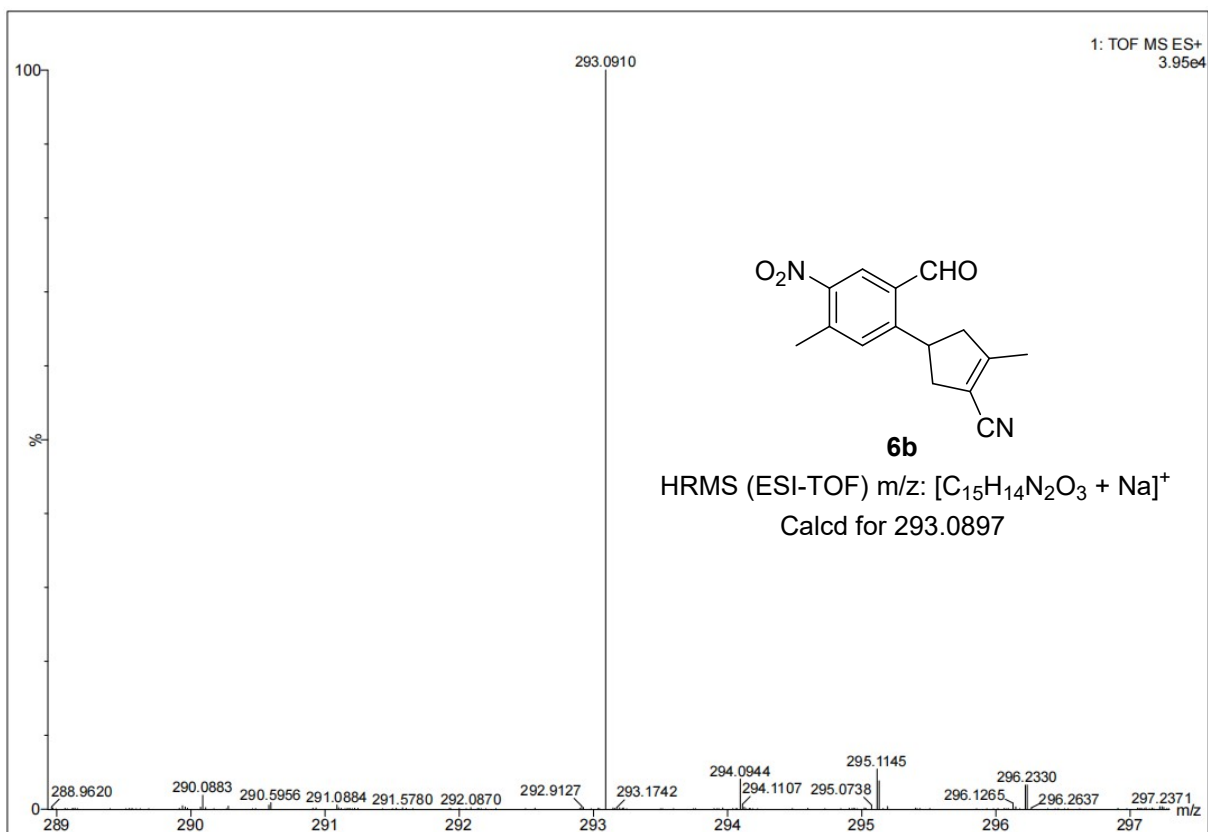

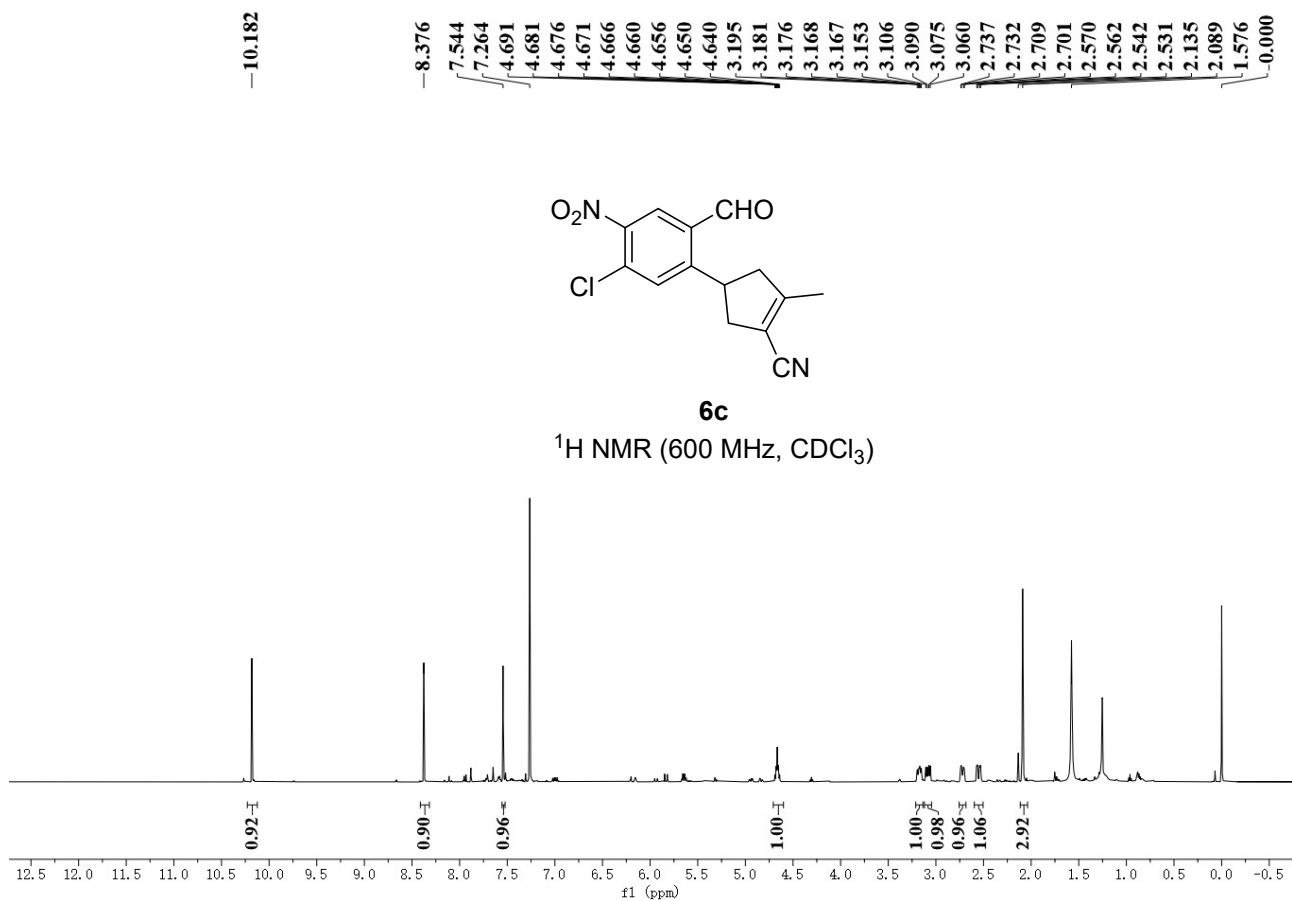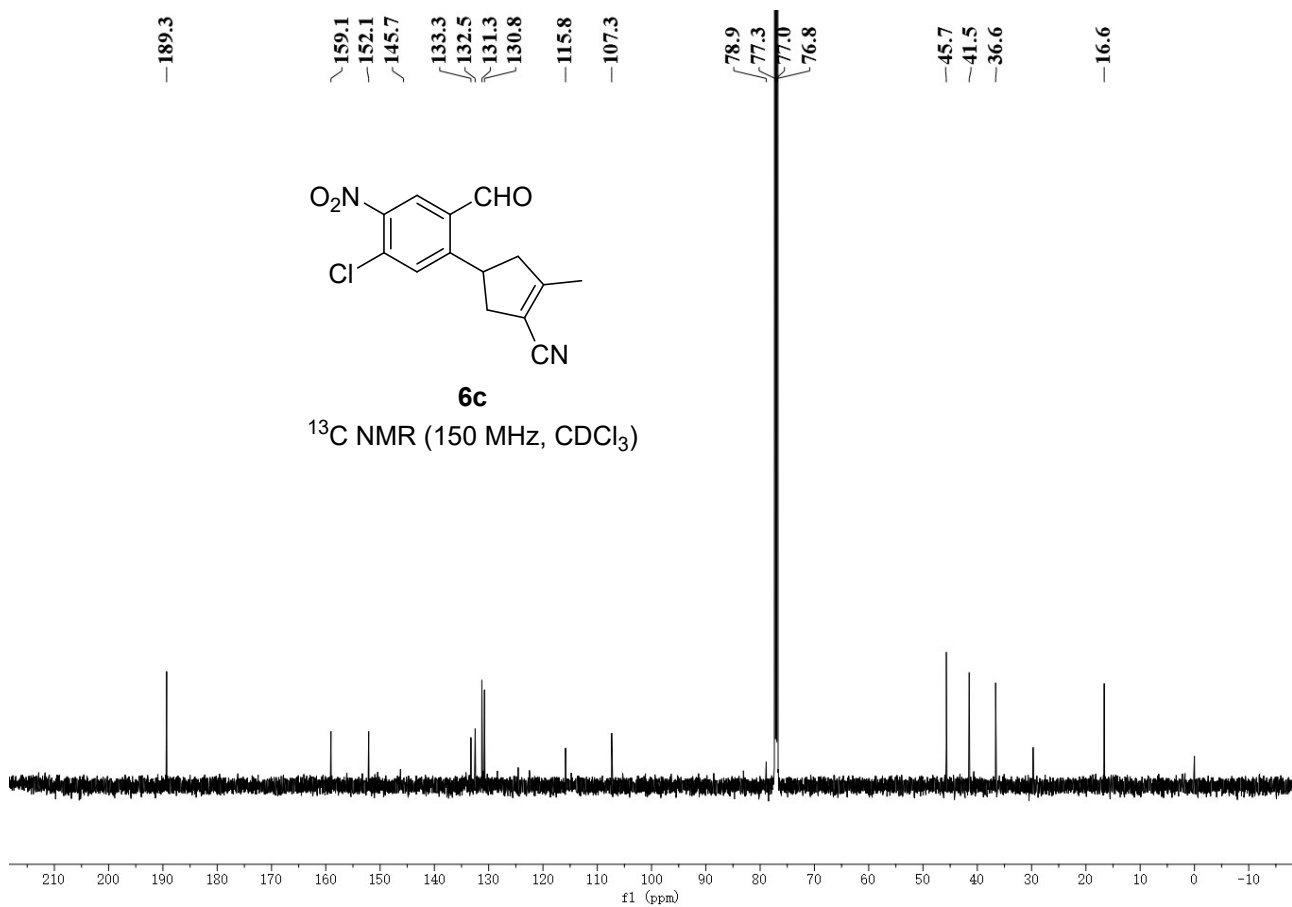



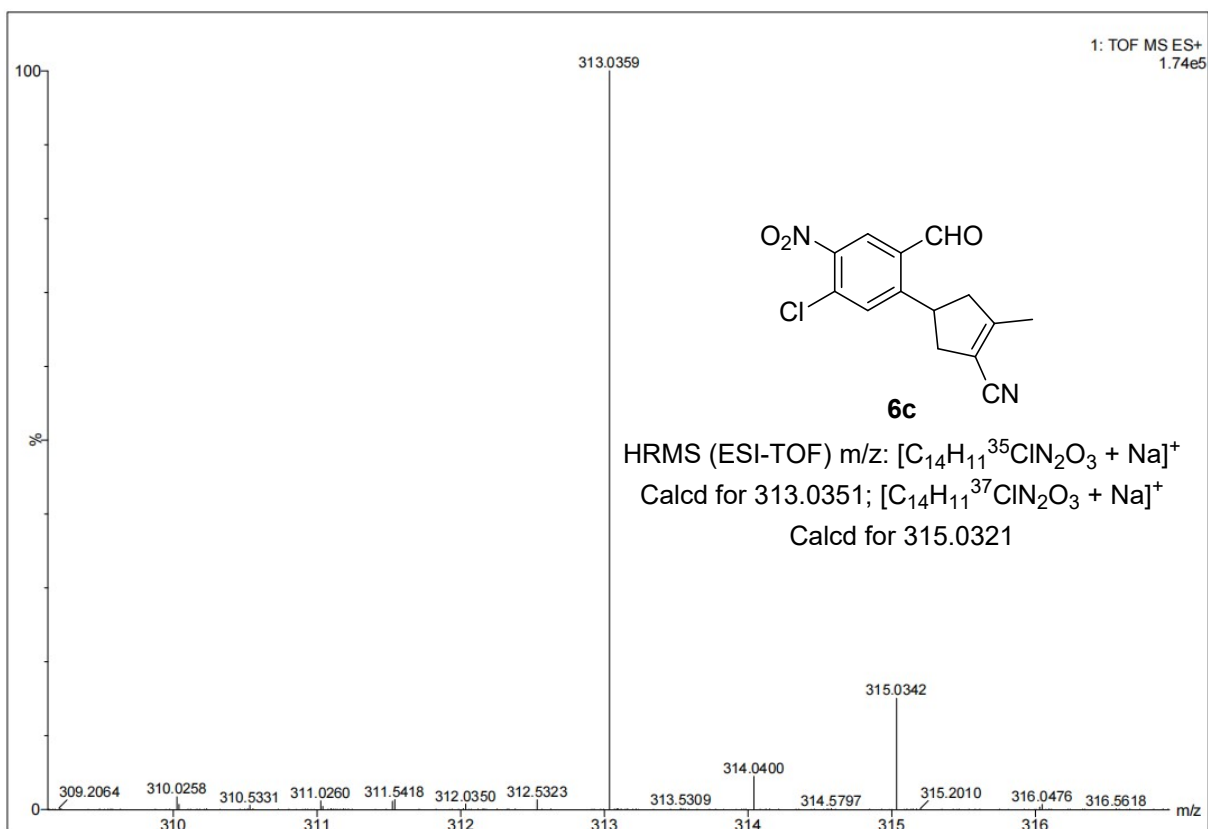

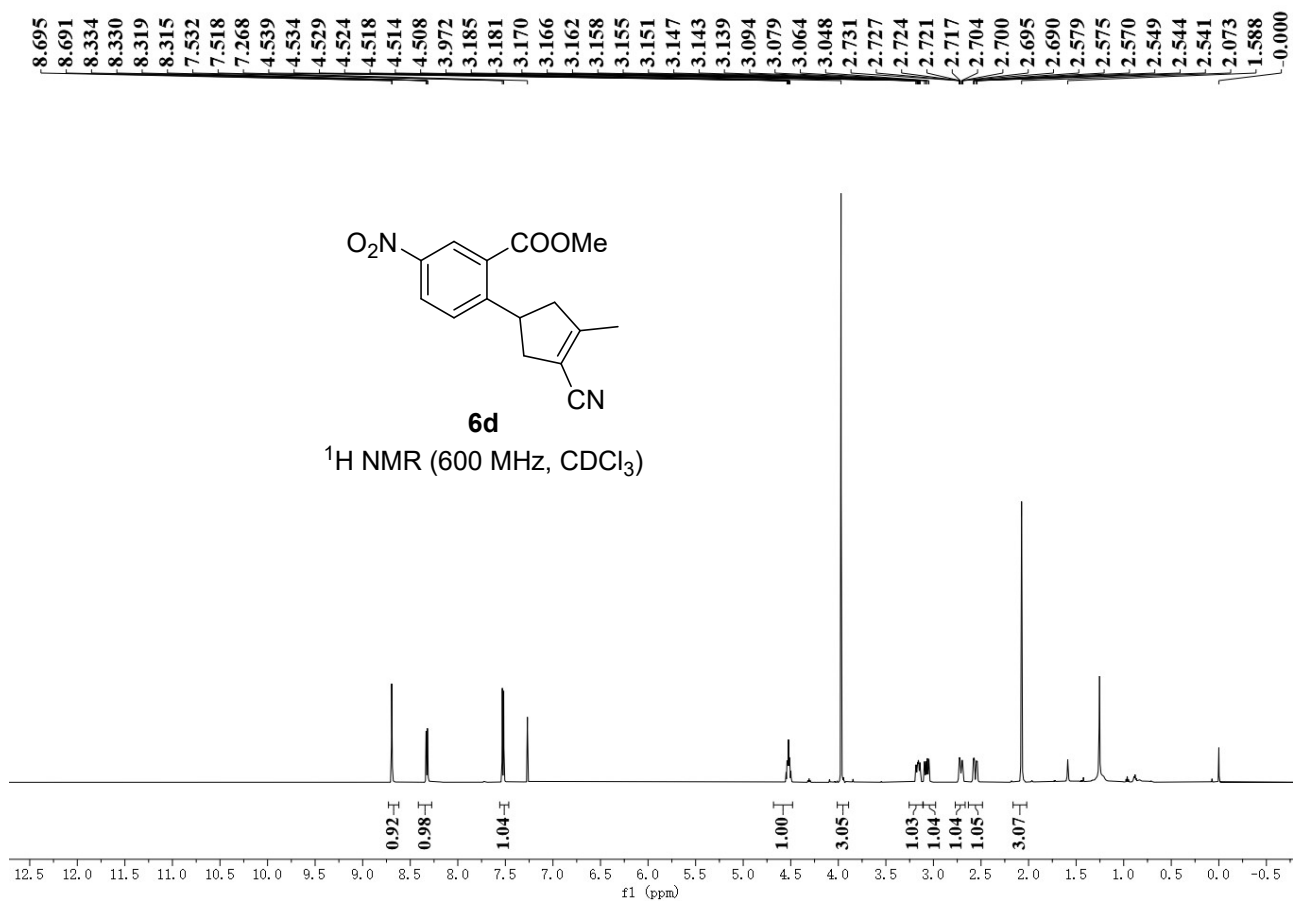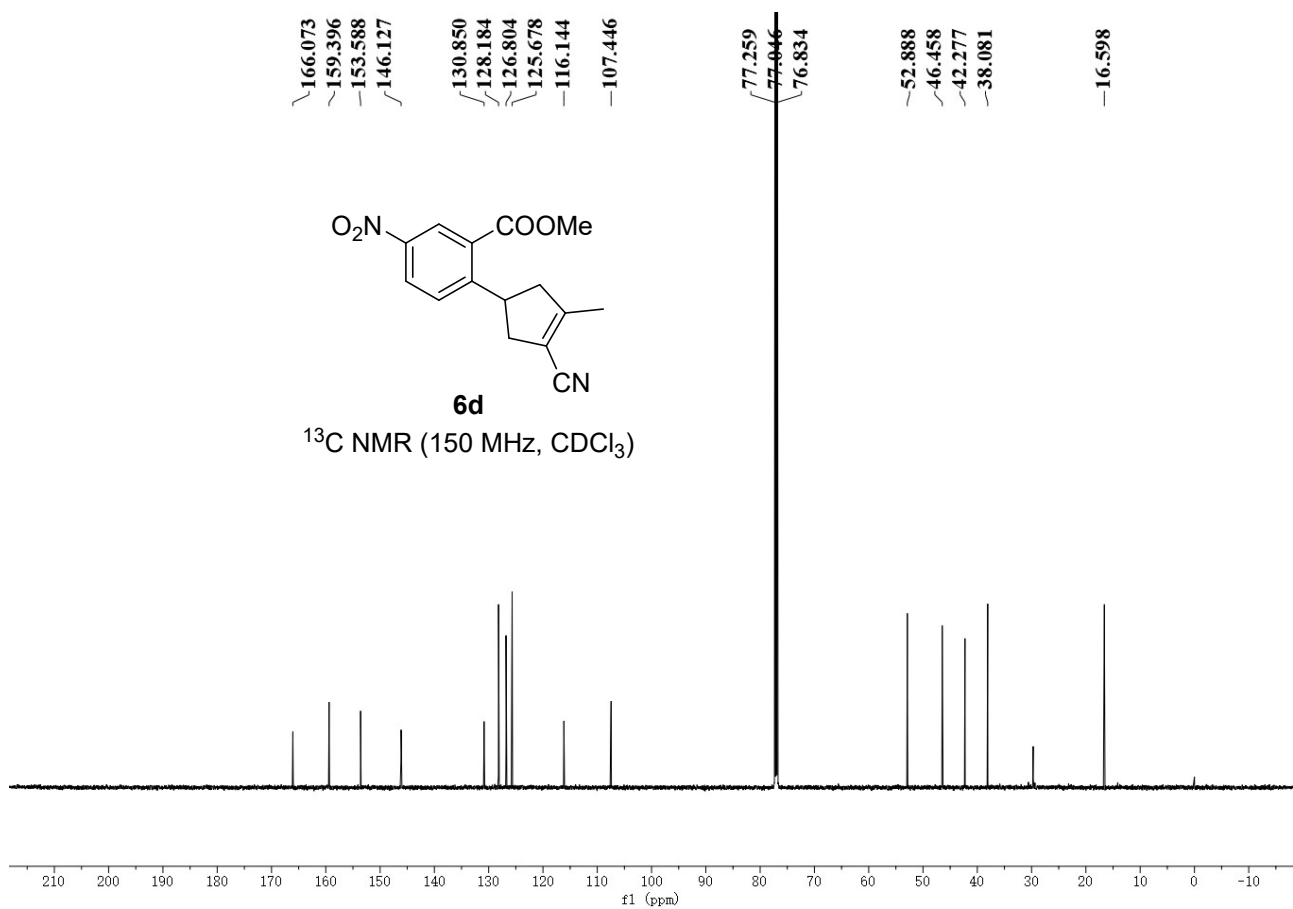

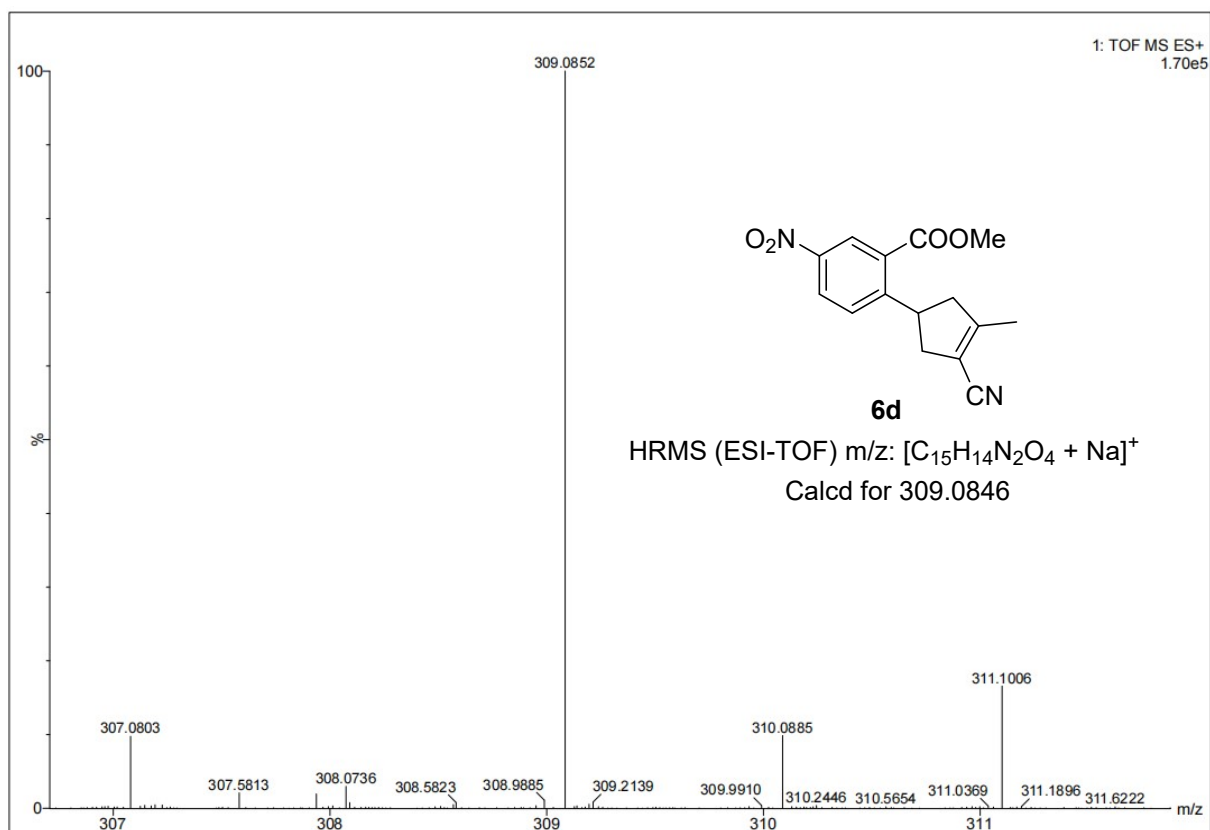

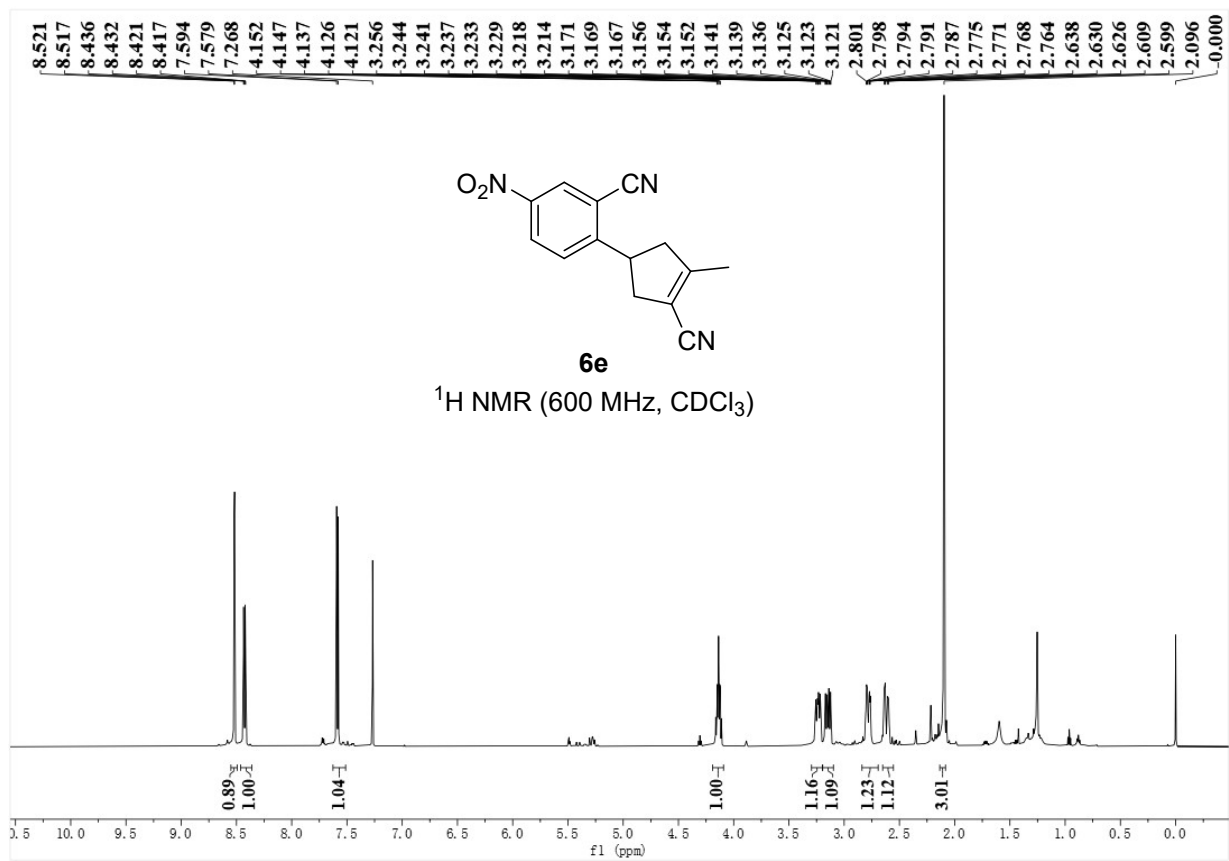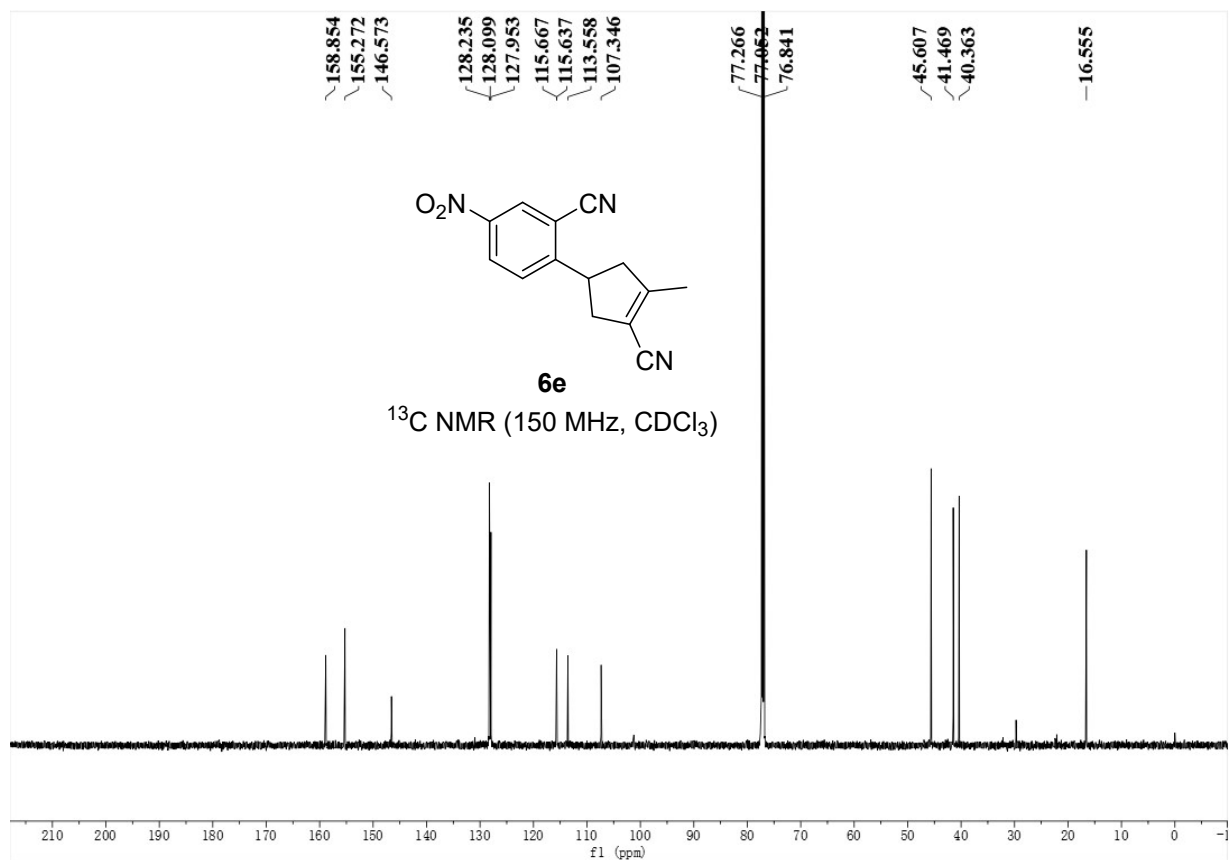

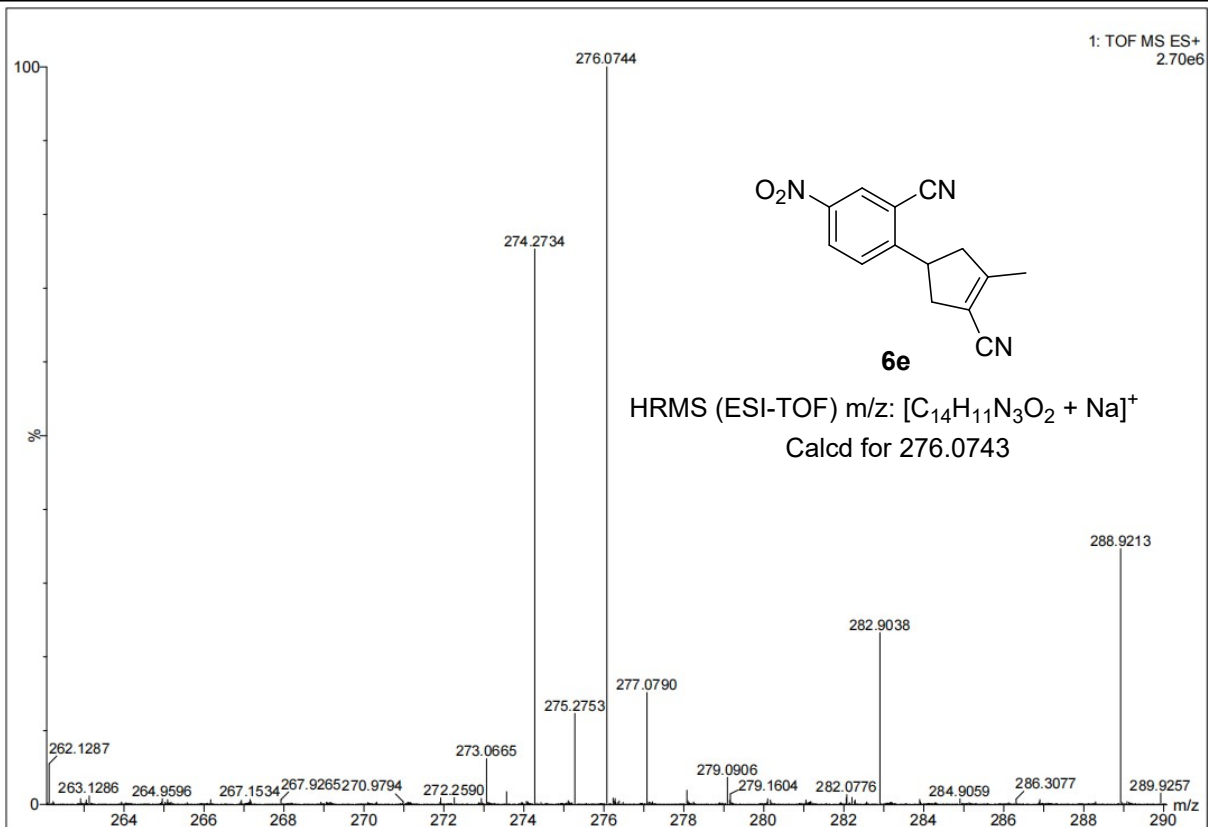

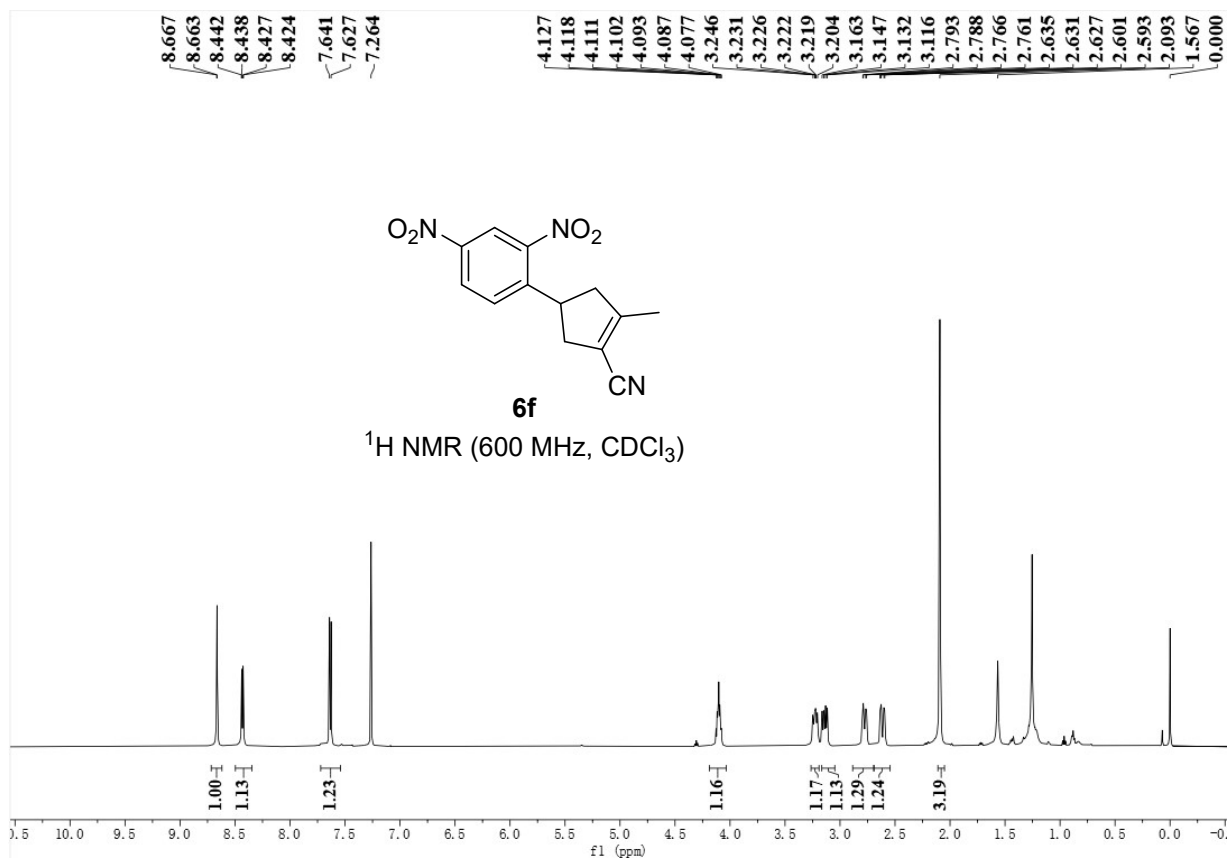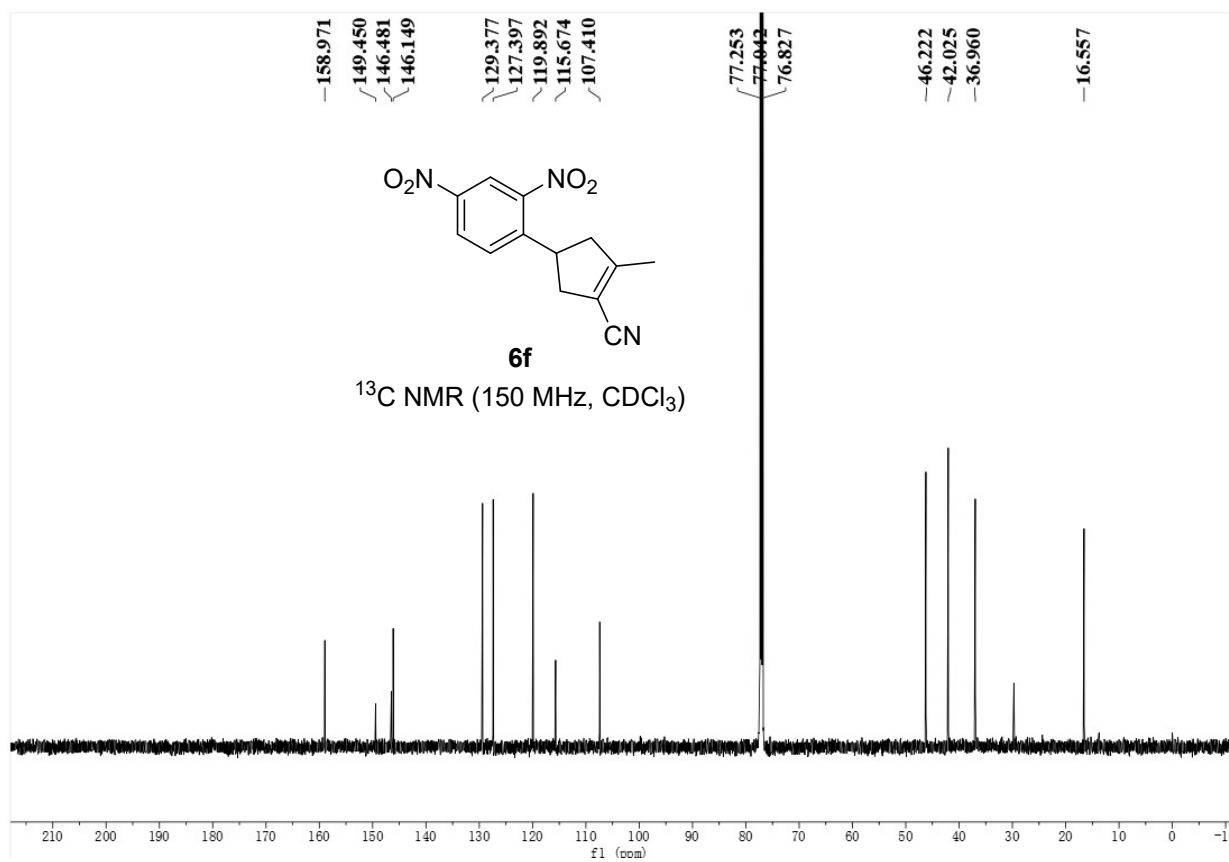

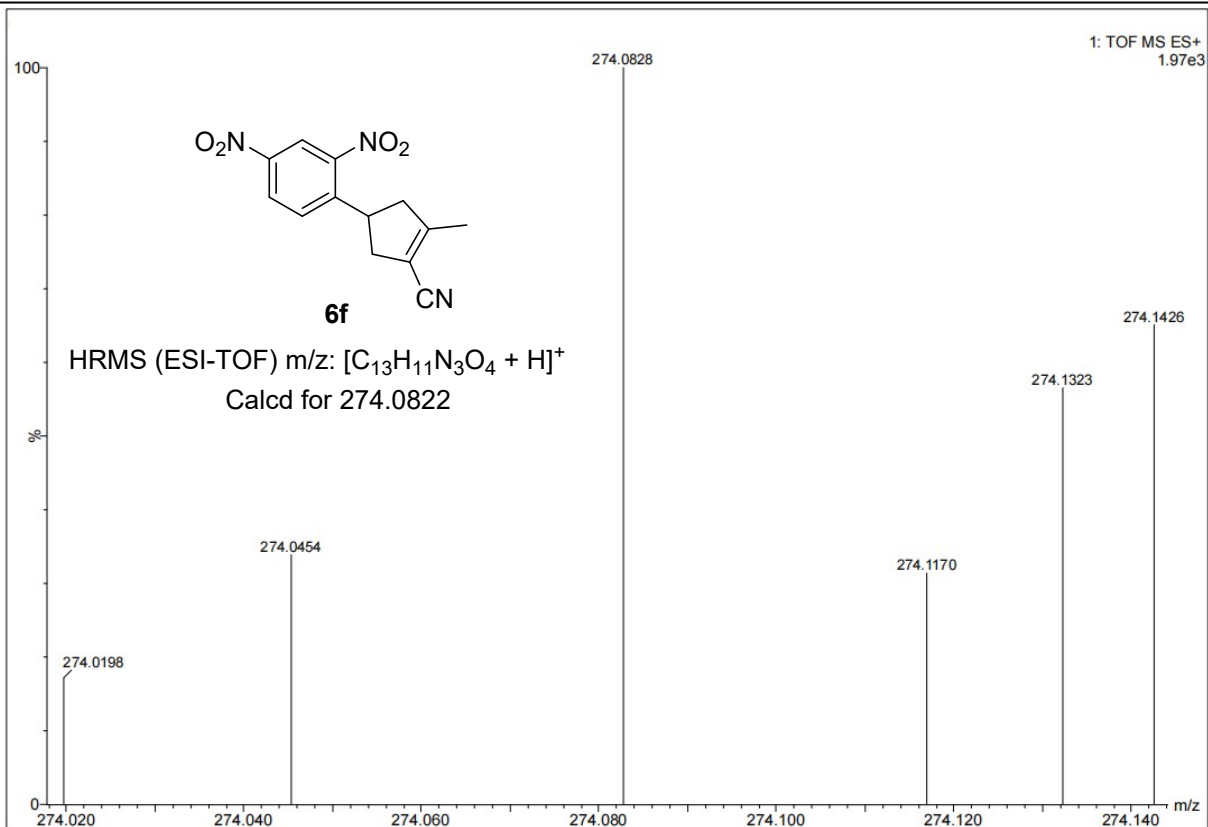

---

## 14. Computational data

### D-Int

zero-point Energies/(ev): -2632.431614

thermal Free Energies/(ev): -2632.431614

G(solv)/(kcal/mol): -26.49

|    |             |             |             |
|----|-------------|-------------|-------------|
| C  | 0.81328700  | 2.70918600  | 0.95318900  |
| C  | -0.35838100 | 3.61528600  | 1.07887800  |
| C  | -0.29784700 | 4.93460500  | 0.85559000  |
| Pd | 0.55210800  | 0.79931200  | 0.11177400  |
| P  | 2.97524400  | 0.45639100  | 0.27323000  |
| C  | 3.74304900  | -0.48915900 | 1.67479200  |
| C  | 5.13177400  | -0.51964100 | 1.89693600  |
| C  | 5.66159100  | -1.22819000 | 2.97528100  |
| C  | 4.81395400  | -1.90297000 | 3.85847800  |
| C  | 3.43352000  | -1.85894700 | 3.66287300  |
| C  | 2.90265800  | -1.15310200 | 2.57957300  |
| C  | 3.97780900  | 2.02547000  | 0.32689300  |
| C  | 4.44633600  | 2.64068500  | -0.84345500 |
| C  | 5.12785100  | 3.85813000  | -0.78045900 |
| C  | 5.34870300  | 4.48029800  | 0.44911100  |
| C  | 4.88178700  | 3.87856300  | 1.61946600  |
| C  | 4.19940500  | 2.66331600  | 1.55960200  |
| C  | 3.55046300  | -0.32964400 | -1.30683600 |
| C  | 4.67881300  | -1.15643700 | -1.40548700 |
| C  | 5.07950800  | -1.65890700 | -2.64413400 |
| C  | 4.36416600  | -1.33763400 | -3.79925900 |
| C  | 3.23476200  | -0.52299500 | -3.70889000 |
| C  | 2.82100800  | -0.02786400 | -2.47023500 |
| H  | -1.15619000 | 5.58709900  | 0.98928400  |
| H  | 0.62972100  | 5.40284900  | 0.53749500  |
| H  | 5.79944700  | 0.02830500  | 1.23910100  |
| H  | 6.73687700  | -1.24495000 | 3.13165000  |
| H  | 5.22913700  | -2.44899900 | 4.70126700  |
| H  | 2.76403900  | -2.36539700 | 4.35268400  |
| H  | 1.82699400  | -1.11251500 | 2.44222200  |



---

|   |             |             |             |
|---|-------------|-------------|-------------|
| H | 4.28803200  | 2.16901500  | -1.80772400 |
| H | 5.49056600  | 4.31607400  | -1.69689900 |
| H | 5.88065000  | 5.42659900  | 0.49583800  |
| H | 5.04636400  | 4.35458200  | 2.58238500  |
| H | 3.84632400  | 2.20706100  | 2.47982500  |
| H | 5.24235400  | -1.42437600 | -0.51856100 |
| H | 5.95234500  | -2.30368500 | -2.70420700 |
| H | 4.68068300  | -1.72837700 | -4.76274000 |
| H | 2.66233200  | -0.27636300 | -4.59890400 |
| H | 1.92333700  | 0.58414800  | -2.41726000 |
| H | -4.69887000 | -3.53414500 | -1.28108400 |
| H | -2.72446700 | -3.22483400 | 0.15398900  |
| C | -3.86733300 | -2.93194300 | -1.63735700 |
| C | -2.74610000 | -2.75636000 | -0.82372800 |
| C | -3.92403000 | -2.33588400 | -2.89843200 |
| H | -4.80071300 | -2.46886900 | -3.52617600 |
| C | -1.66503200 | -1.97613600 | -1.26158900 |
| H | -0.47624000 | -4.46352500 | 0.92778800  |
| C | -2.85631700 | -1.55276600 | -3.34014900 |
| C | -1.73610400 | -1.36556600 | -2.52705900 |
| H | -2.89888200 | -1.06739900 | -4.31124700 |
| H | 0.06660700  | -3.22012400 | -2.83110700 |
| H | -0.93999600 | -0.70535600 | -2.86053900 |
| C | 0.86628600  | -3.56377100 | -2.18428500 |
| C | 1.74501500  | -4.54354600 | -2.65132400 |
| H | 1.61770300  | -4.93923900 | -3.65551500 |
| H | -1.44900200 | -1.17128600 | 4.51450500  |
| H | -1.63816200 | -3.60897000 | 4.97541500  |
| C | -1.24289200 | -1.89346600 | 3.72877800  |
| C | -1.34679100 | -3.26096800 | 3.98813800  |
| C | -0.86845800 | -1.44988300 | 2.45804500  |
| H | -0.77539900 | -0.38555300 | 2.25630800  |
| C | -1.07172700 | -4.18100100 | 2.97321600  |
| H | -1.14973800 | -5.24718100 | 3.16845700  |
| C | -0.59124100 | -2.36327200 | 1.42925500  |

---

|   |             |             |             |
|---|-------------|-------------|-------------|
| C | -0.69536200 | -3.73758700 | 1.70441200  |
| P | -0.12756500 | -1.69805300 | -0.24698300 |
| C | 1.00172100  | -3.04048400 | -0.88986800 |
| H | 2.17655200  | -3.13617600 | 0.92675200  |
| C | 2.04594800  | -3.51862900 | -0.08009500 |
| C | 2.91677900  | -4.50348500 | -0.54588600 |
| C | 2.77009400  | -5.02026700 | -1.83444800 |
| H | 3.71017300  | -4.86594500 | 0.10261000  |
| H | 3.44765700  | -5.78859100 | -2.19712800 |
| C | -1.65855800 | 2.92016400  | 1.46888100  |
| H | -1.39419900 | 2.08904900  | 2.13545200  |
| C | -2.58630400 | 3.79648700  | 2.19921900  |
| N | -3.32979100 | 4.48453600  | 2.76711400  |
| C | -3.80532600 | 0.86698200  | 1.67406000  |
| C | -3.59813900 | 1.52476400  | 0.45103500  |
| C | -4.58261600 | 1.35860700  | -0.55827700 |
| C | -5.70771500 | 0.55722500  | -0.33417100 |
| C | -5.86288200 | -0.07941400 | 0.88746600  |
| C | -4.92186300 | 0.06960100  | 1.90406300  |
| H | -3.08780700 | 0.97516000  | 2.47806500  |
| H | -6.44275800 | 0.44294900  | -1.12142500 |
| H | -5.07093600 | -0.43463400 | 2.85089000  |
| C | -4.49256600 | 1.99811600  | -1.90341400 |
| H | -3.63307600 | 2.66757300  | -2.08228400 |
| O | -5.31336400 | 1.81420400  | -2.78376700 |
| C | -2.33234600 | 2.33886000  | 0.18190500  |
| H | -2.62002800 | 3.22378800  | -0.39026700 |
| C | -1.34489000 | 1.50126400  | -0.67313900 |
| H | -1.80167300 | 0.55264200  | -0.94140000 |
| N | -7.03538500 | -0.93506900 | 1.11511200  |
| O | -7.13573900 | -1.48345300 | 2.21368400  |
| O | -7.84236900 | -1.05775200 | 0.19488400  |
| C | -0.84918400 | 2.11214700  | -1.93655700 |
| O | -1.07603600 | 3.44817300  | -2.03991900 |
| O | -0.28336900 | 1.50050300  | -2.84090400 |

---

|   |             |            |             |
|---|-------------|------------|-------------|
| C | -0.56029600 | 4.08132600 | -3.21826300 |
| H | 0.52770100  | 3.98107100 | -3.26406200 |
| H | -0.99556000 | 3.63936700 | -4.11839800 |
| H | -0.84217900 | 5.13139700 | -3.13149600 |
| H | 1.13809700  | 2.38169000 | 1.95329000  |
| H | 1.64736300  | 3.21601500 | 0.46639500  |

**D-Ts**

**zero-point Energies/(ev): -2632.391237**

**thermal Free Energies/(ev): -2632.495721**

**G(soln)/(kcal/mol): -25.75**

|    |             |             |             |
|----|-------------|-------------|-------------|
| C  | 0.38863700  | 2.28410700  | 1.52846100  |
| C  | -0.62268600 | 3.04113400  | 2.32249100  |
| C  | -0.38171700 | 4.21607500  | 2.91107200  |
| Pd | 0.57359100  | 0.27290300  | 0.54006200  |
| P  | 2.97854600  | 0.55687000  | -0.11763100 |
| C  | 4.26596000  | -0.13022700 | 1.03585600  |
| C  | 5.64343800  | 0.08888700  | 0.85778700  |
| C  | 6.56748600  | -0.42357800 | 1.76831400  |
| C  | 6.13015600  | -1.15200300 | 2.87864400  |
| C  | 4.76516100  | -1.36119200 | 3.07648900  |
| C  | 3.84042500  | -0.85122600 | 2.16065300  |
| C  | 3.60393800  | 2.30770500  | -0.29209300 |
| C  | 3.71215900  | 2.96741600  | -1.52540900 |
| C  | 4.08745000  | 4.31200300  | -1.58328700 |
| C  | 4.35408400  | 5.02482400  | -0.41278700 |
| C  | 4.24475300  | 4.38078300  | 0.82167800  |
| C  | 3.87097900  | 3.03758200  | 0.88170300  |
| C  | 3.33390000  | -0.20752100 | -1.77155600 |
| C  | 4.37905900  | -1.11046800 | -2.01186300 |
| C  | 4.54854500  | -1.67659600 | -3.27760500 |
| C  | 3.68410300  | -1.34409200 | -4.32080300 |
| C  | 2.63451300  | -0.45234600 | -4.08850400 |
| C  | 2.44803400  | 0.10178700  | -2.82119900 |
| H  | -1.13403000 | 4.72365100  | 3.50776900  |

---

|   |             |             |             |
|---|-------------|-------------|-------------|
| H | 0.58796600  | 4.69768400  | 2.82068600  |
| H | 5.99219500  | 0.67075600  | 0.00940100  |
| H | 7.62922100  | -0.24848100 | 1.61542900  |
| H | 6.85143900  | -1.54564200 | 3.58991900  |
| H | 4.41677600  | -1.91427800 | 3.94481600  |
| H | 2.77560500  | -1.00035700 | 2.32167600  |
| H | 3.51188400  | 2.43325400  | -2.44760300 |
| H | 4.17960000  | 4.79888200  | -2.55095300 |
| H | 4.64874500  | 6.06965600  | -0.46151500 |
| H | 4.45609600  | 4.92108600  | 1.74098800  |
| H | 3.80700500  | 2.54811900  | 1.85018600  |
| H | 5.05922600  | -1.38559700 | -1.21329800 |
| H | 5.36084000  | -2.37919500 | -3.44496800 |
| H | 3.82160100  | -1.78265500 | -5.30568700 |
| H | 1.95007200  | -0.19312900 | -4.89224000 |
| H | 1.61579000  | 0.77869900  | -2.64480300 |
| H | -4.60740000 | -3.62866600 | -1.54067800 |
| H | -2.77459100 | -3.58955000 | 0.10620100  |
| C | -3.74076200 | -2.99746700 | -1.71758200 |
| C | -2.70415700 | -2.96904600 | -0.78121700 |
| C | -3.67161400 | -2.20931300 | -2.86814600 |
| H | -4.47921200 | -2.23232800 | -3.59478500 |
| C | -1.58732500 | -2.14280100 | -0.97672900 |
| H | -0.64113200 | -4.89847000 | 0.96982900  |
| C | -2.56309800 | -1.38535500 | -3.07578600 |
| C | -1.53336000 | -1.34468600 | -2.13388100 |
| H | -2.50179600 | -0.76543000 | -3.96631000 |
| H | -0.04466100 | -3.73389100 | -2.28730400 |
| H | -0.68069300 | -0.69042300 | -2.29936000 |
| C | 0.83699000  | -3.93876800 | -1.68955900 |
| C | 1.77754600  | -4.86362800 | -2.15245000 |
| H | 1.61350900  | -5.36171300 | -3.10452800 |
| H | -1.77479300 | -2.10097800 | 4.91282700  |
| H | -2.04707300 | -4.57180100 | 5.01841700  |
| C | -1.53890600 | -2.71425000 | 4.04702400  |

---

|   |             |             |             |
|---|-------------|-------------|-------------|
| C | -1.68890300 | -4.10060500 | 4.10709600  |
| C | -1.07370000 | -2.11377500 | 2.87480300  |
| H | -0.93098300 | -1.03620000 | 2.83156900  |
| C | -1.36632100 | -4.88164900 | 2.99426400  |
| H | -1.47253400 | -5.96239200 | 3.03827600  |
| C | -0.76041300 | -2.88422800 | 1.74536700  |
| C | -0.90224300 | -4.27993100 | 1.82347500  |
| P | -0.16032200 | -2.01129800 | 0.21203900  |
| C | 1.02678100  | -3.28195500 | -0.46596700 |
| H | 2.35212200  | -3.07353500 | 1.22990400  |
| C | 2.18024100  | -3.57342900 | 0.28153300  |
| C | 3.11198700  | -4.50337500 | -0.17587300 |
| C | 2.91426200  | -5.15148200 | -1.39806500 |
| H | 3.99472700  | -4.71756400 | 0.42106600  |
| H | 3.64202500  | -5.87385600 | -1.75814200 |
| C | -1.96405300 | 2.34408800  | 2.30500300  |
| H | -1.82407700 | 1.30889200  | 2.64426400  |
| C | -2.99796800 | 2.96318300  | 3.13619200  |
| N | -3.81897700 | 3.46161600  | 3.78838700  |
| C | -3.80706800 | 0.29130000  | 1.05653700  |
| C | -3.56062000 | 1.51867100  | 0.42007700  |
| C | -4.46651200 | 1.93994500  | -0.58626800 |
| C | -5.56851000 | 1.14354500  | -0.92532200 |
| C | -5.76199200 | -0.06719400 | -0.28125300 |
| C | -4.89249300 | -0.50661400 | 0.71537600  |
| H | -3.13452000 | -0.06815500 | 1.82642400  |
| H | -6.24867100 | 1.48102100  | -1.69790100 |
| H | -5.06766200 | -1.45870100 | 1.19979800  |
| C | -4.31647800 | 3.20708400  | -1.36027000 |
| H | -3.42982800 | 3.82781200  | -1.14097100 |
| O | -5.10850100 | 3.56165600  | -2.21377600 |
| C | -2.32850300 | 2.33774500  | 0.78518100  |
| H | -2.51246300 | 3.38483800  | 0.54841600  |
| C | -1.08275900 | 1.88717600  | -0.00725000 |
| H | -1.26800400 | 0.93726700  | -0.51770900 |

---

|   |             |             |             |
|---|-------------|-------------|-------------|
| N | -6.88899100 | -0.92451800 | -0.67547700 |
| O | -6.97658200 | -2.03049600 | -0.13900100 |
| O | -7.66831800 | -0.49293400 | -1.52241300 |
| C | -0.51535100 | 2.81524000  | -1.02427500 |
| O | -0.82009800 | 4.11799100  | -0.80311400 |
| O | 0.16848100  | 2.46018900  | -1.97125000 |
| C | -0.25314200 | 5.05389400  | -1.73669300 |
| H | 0.83819300  | 4.99915300  | -1.71323300 |
| H | -0.60198800 | 4.84312400  | -2.75089600 |
| H | -0.59783700 | 6.03483300  | -1.40839400 |
| H | 0.85142800  | 1.52917300  | 2.20285300  |
| H | 1.15563500  | 2.92475300  | 1.09732000  |

### M-Int

zero-point Energies/(ev): **-2632.442496**

thermal Free Energies/(ev): **-2632.545401**

G(solvent)/(kcal/mol): **-26.03**

|    |             |             |             |
|----|-------------|-------------|-------------|
| C  | -0.06751900 | 2.56407400  | 0.62040500  |
| C  | 1.34129600  | 2.78840000  | 0.24013800  |
| C  | 1.72068400  | 3.62377300  | -0.74425800 |
| Pd | -0.62538400 | 0.59875300  | 0.03361600  |
| P  | -2.79946900 | 1.23817900  | 0.59953300  |
| C  | -4.27614300 | 0.19015100  | 0.17658700  |
| C  | -5.42416400 | 0.69924600  | -0.44591600 |
| C  | -6.52735500 | -0.12714800 | -0.67745900 |
| C  | -6.49753300 | -1.46579600 | -0.28838300 |
| C  | -5.35668800 | -1.98069500 | 0.33287800  |
| C  | -4.25403700 | -1.16031900 | 0.56085400  |
| C  | -3.29801700 | 2.92500300  | 0.00858600  |
| C  | -3.72070200 | 3.95439600  | 0.85992700  |
| C  | -4.05089500 | 5.20979200  | 0.34117800  |
| C  | -3.96671100 | 5.45052800  | -1.02990100 |
| C  | -3.53814300 | 4.43250700  | -1.88640500 |
| C  | -3.19703900 | 3.18342700  | -1.36978700 |
| C  | -2.95145400 | 1.27238600  | 2.45253300  |

---

|   |             |             |             |
|---|-------------|-------------|-------------|
| C | -4.20215800 | 1.46274500  | 3.06823600  |
| C | -4.31099700 | 1.47238300  | 4.45811200  |
| C | -3.17694500 | 1.28057000  | 5.25328700  |
| C | -1.93607900 | 1.07184100  | 4.65246700  |
| C | -1.82330900 | 1.06367800  | 3.25950500  |
| H | 2.76650200  | 3.77155100  | -1.00361100 |
| H | 0.98870400  | 4.18452500  | -1.31964200 |
| H | -5.46754800 | 1.74087300  | -0.74552500 |
| H | -7.41194900 | 0.28278800  | -1.15794800 |
| H | -7.35703800 | -2.10619100 | -0.46694200 |
| H | -5.32259000 | -3.02328400 | 0.63600500  |
| H | -3.37308200 | -1.57327000 | 1.04493400  |
| H | -3.78589100 | 3.78555700  | 1.92928200  |
| H | -4.37085100 | 5.99975800  | 1.01522200  |
| H | -4.22368700 | 6.42751800  | -1.42996800 |
| H | -3.45806200 | 4.61428300  | -2.95477900 |
| H | -2.83617800 | 2.40660300  | -2.03956700 |
| H | -5.09427000 | 1.59114500  | 2.46195600  |
| H | -5.28309800 | 1.62315100  | 4.92014800  |
| H | -3.26499000 | 1.28725100  | 6.33643000  |
| H | -1.04574200 | 0.91787500  | 5.25499200  |
| H | -0.85262600 | 0.88816500  | 2.80893900  |
| H | 0.83784900  | -1.18296200 | -5.93490900 |
| H | -0.88898300 | -1.28771800 | -4.19001100 |
| C | 1.13313000  | -1.33917800 | -4.90052500 |
| C | 0.15271600  | -1.39383400 | -3.90703100 |
| C | 2.47948500  | -1.49482500 | -4.57082900 |
| H | 3.24098900  | -1.45739000 | -5.34534300 |
| C | 0.50632300  | -1.59903900 | -2.56501700 |
| H | -2.15811000 | -4.25645500 | -1.65679400 |
| C | 2.84038600  | -1.70470800 | -3.23799500 |
| C | 1.86569600  | -1.75210000 | -2.24121200 |
| H | 3.88562100  | -1.83320300 | -2.96868600 |
| H | 0.38624100  | -4.32051900 | -1.76013000 |
| H | 2.15453900  | -1.89894000 | -1.20829700 |

---

|   |             |             |             |
|---|-------------|-------------|-------------|
| C | 0.23819800  | -4.22757100 | -0.68818400 |
| C | 0.58526600  | -5.28749200 | 0.15074700  |
| H | 0.98913700  | -6.20178000 | -0.27613900 |
| H | -4.73918200 | -0.74401300 | -4.02961600 |
| H | -5.45827200 | -3.12322000 | -4.16122200 |
| C | -4.17131300 | -1.51584900 | -3.51731500 |
| C | -4.57648400 | -2.85003800 | -3.58780300 |
| C | -3.04337500 | -1.16774300 | -2.77370400 |
| H | -2.74495400 | -0.12441000 | -2.70842400 |
| C | -3.84802800 | -3.82902700 | -2.91058500 |
| H | -4.16055700 | -4.86917700 | -2.95466300 |
| C | -2.29008000 | -2.14657800 | -2.10519800 |
| C | -2.71197700 | -3.48214700 | -2.17652500 |
| P | -0.76237800 | -1.59433100 | -1.19906400 |
| C | -0.27971400 | -3.03710200 | -0.15108700 |
| H | -0.78496300 | -1.99445600 | 1.66809000  |
| C | -0.42713700 | -2.92625400 | 1.23955900  |
| C | -0.07530100 | -3.98614000 | 2.07715000  |
| C | 0.42980200  | -5.16816900 | 1.53382500  |
| H | -0.16925700 | -3.87800300 | 3.15326500  |
| H | 0.71861600  | -5.98602200 | 2.18781800  |
| C | 2.40450000  | 1.95445600  | 0.94008700  |
| H | 3.37886500  | 2.44714500  | 0.84347500  |
| C | 2.12940400  | 1.78127900  | 2.37129100  |
| N | 1.89332500  | 1.63545600  | 3.49955400  |
| C | 6.01723100  | -0.77879700 | 1.03768100  |
| C | 4.99844600  | 0.01128500  | 0.46592300  |
| C | 3.64415900  | -0.27622200 | 0.77678800  |
| C | 3.35360900  | -1.32049500 | 1.65830000  |
| C | 4.38802300  | -2.06677200 | 2.21236300  |
| C | 5.72686200  | -1.81605400 | 1.91113000  |
| H | 7.05076700  | -0.58767800 | 0.76643400  |
| H | 2.32090200  | -1.54105400 | 1.89116800  |
| H | 6.50362200  | -2.43067200 | 2.34811500  |
| C | 2.47288600  | 0.54260000  | 0.21664800  |



---

|   |             |             |             |
|---|-------------|-------------|-------------|
| H | 2.70678800  | 0.80776800  | -0.83256400 |
| O | 1.30291000  | -0.15225100 | 0.31983600  |
| C | 5.34518700  | 1.11052200  | -0.44580300 |
| H | 4.60794800  | 1.38032300  | -1.19634000 |
| C | 6.48772500  | 1.82274800  | -0.41916000 |
| H | 7.26533400  | 1.64846200  | 0.31818200  |
| N | 4.06729500  | -3.16449900 | 3.13747000  |
| O | 5.00284900  | -3.84716100 | 3.55952400  |
| O | 2.88710600  | -3.34090400 | 3.43823500  |
| C | 6.80501600  | 2.91512500  | -1.36239100 |
| O | 5.78716600  | 3.19966100  | -2.21440600 |
| O | 7.86764000  | 3.50661800  | -1.37475800 |
| C | 6.05778200  | 4.24681800  | -3.15692800 |
| H | 6.27652200  | 5.18454000  | -2.63874600 |
| H | 6.91122200  | 3.98563100  | -3.78876700 |
| H | 5.15179600  | 4.34200000  | -3.75641100 |
| H | -0.21974600 | 2.64175800  | 1.69909700  |
| H | -0.72779100 | 3.25911100  | 0.10076800  |

### M-Ts

**zero-point Energies/(ev): -2632.384784**

**thermal Free Energies/(ev): -2632.491929**

**G(soln)/(kcal/mol): -26.43**

|    |             |             |             |
|----|-------------|-------------|-------------|
| C  | 0.02451700  | 0.79503700  | -2.03444900 |
| C  | 1.31195400  | 0.39159200  | -2.61779500 |
| C  | 1.41694200  | -0.59538900 | -3.51946400 |
| Pd | -0.91491900 | -0.11603500 | -0.01934800 |
| P  | -2.94383100 | 1.13165300  | -0.25571300 |
| C  | -4.39015300 | 0.68074400  | 0.82938500  |
| C  | -5.63984700 | 0.27401000  | 0.34074600  |
| C  | -6.67349900 | -0.05561800 | 1.22267200  |
| C  | -6.47654000 | 0.02494100  | 2.60140100  |
| C  | -5.23426500 | 0.43149500  | 3.09863800  |
| C  | -4.19856100 | 0.74848400  | 2.22064400  |
| C  | -3.62402600 | 0.94148300  | -1.97729600 |

---

|   |             |             |             |
|---|-------------|-------------|-------------|
| C | -4.01099000 | 2.01932400  | -2.78710000 |
| C | -4.45872500 | 1.80105200  | -4.09304600 |
| C | -4.53411900 | 0.50571300  | -4.60598200 |
| C | -4.14938500 | -0.57611100 | -3.80930800 |
| C | -3.68730600 | -0.35948500 | -2.51093900 |
| C | -2.87673500 | 2.97022100  | 0.01231300  |
| C | -4.03157000 | 3.75618700  | 0.17014100  |
| C | -3.92552100 | 5.13150500  | 0.37622600  |
| C | -2.66692500 | 5.73741000  | 0.43596000  |
| C | -1.51414700 | 4.96524500  | 0.28978200  |
| C | -1.61849900 | 3.58691600  | 0.08006700  |
| H | 2.37021800  | -0.85807700 | -3.97085400 |
| H | 0.54520700  | -1.15272300 | -3.85027500 |
| H | -5.81298200 | 0.21639900  | -0.72904700 |
| H | -7.63626100 | -0.36851000 | 0.82663200  |
| H | -7.28364600 | -0.22482000 | 3.28500000  |
| H | -5.07025300 | 0.49961200  | 4.17091600  |
| H | -3.23292300 | 1.05323600  | 2.61732700  |
| H | -3.96106900 | 3.03275500  | -2.40288800 |
| H | -4.74919400 | 2.64877200  | -4.70814300 |
| H | -4.88394000 | 0.33936100  | -5.62136900 |
| H | -4.19855900 | -1.58883100 | -4.20095100 |
| H | -3.36625900 | -1.20307700 | -1.90429500 |
| H | -5.01320600 | 3.29142300  | 0.14174600  |
| H | -4.82529400 | 5.72925500  | 0.49822700  |
| H | -2.58613900 | 6.80772700  | 0.60632700  |
| H | -0.53307800 | 5.42590700  | 0.35750200  |
| H | -0.71968200 | 2.98308400  | -0.01419000 |
| H | -2.72113500 | -6.03907300 | -1.89312800 |
| H | -2.36935000 | -4.54354000 | 0.03537000  |
| C | -1.87659200 | -5.35471800 | -1.89349600 |
| C | -1.67826100 | -4.50634500 | -0.80056600 |
| C | -0.99428000 | -5.33258800 | -2.97373700 |
| H | -1.14685400 | -5.99685900 | -3.82011400 |
| C | -0.59588500 | -3.61450800 | -0.77560800 |

---

|   |             |             |             |
|---|-------------|-------------|-------------|
| H | 0.04952800  | -4.62763100 | 2.58697600  |
| C | 0.08943700  | -4.45000700 | -2.95811500 |
| C | 0.28177500  | -3.59443900 | -1.87366300 |
| H | 0.78636300  | -4.42766800 | -3.79239700 |
| H | 1.60330900  | -4.71094500 | 0.34682900  |
| H | 1.12399500  | -2.90777400 | -1.87754700 |
| C | 2.06996900  | -3.92380300 | 0.93124100  |
| C | 3.36238700  | -4.11083800 | 1.42847300  |
| H | 3.88455900  | -5.04384500 | 1.23086100  |
| H | -4.43403900 | -2.66297000 | 3.41197200  |
| H | -3.63911400 | -4.58639500 | 4.78703900  |
| C | -3.45703200 | -3.10268600 | 3.23145600  |
| C | -3.00979900 | -4.17728800 | 4.00084400  |
| C | -2.64103500 | -2.57244600 | 2.22914300  |
| H | -2.98377800 | -1.72567400 | 1.64261900  |
| C | -1.74486700 | -4.72136300 | 3.76221500  |
| H | -1.38792900 | -5.55485300 | 4.36184400  |
| C | -1.37409000 | -3.11661000 | 1.97560300  |
| C | -0.93266200 | -4.19752600 | 2.75601000  |
| P | -0.36068600 | -2.37599000 | 0.59619100  |
| C | 1.37680800  | -2.72807600 | 1.17666600  |
| H | 1.48874400  | -0.78826900 | 2.11390100  |
| C | 2.00947100  | -1.72549200 | 1.93052800  |
| C | 3.29614100  | -1.91782400 | 2.43719900  |
| C | 3.97821300  | -3.11038100 | 2.18296500  |
| H | 3.76777000  | -1.13309000 | 3.02280200  |
| H | 4.98320000  | -3.25727900 | 2.56898100  |
| C | 2.50325500  | 1.14041500  | -2.05993500 |
| H | 3.45010200  | 0.66739100  | -2.34184600 |
| C | 2.52183300  | 2.53154300  | -2.52757500 |
| N | 2.52702300  | 3.62880300  | -2.90779000 |
| C | 5.33298200  | 2.60544400  | 1.20081600  |
| C | 4.53585400  | 1.67868600  | 0.49864600  |
| C | 3.16327700  | 1.97090800  | 0.29239200  |
| C | 2.63680100  | 3.16732400  | 0.78086400  |

---

|   |             |             |             |
|---|-------------|-------------|-------------|
| C | 3.45923000  | 4.05822000  | 1.46110900  |
| C | 4.81028300  | 3.79696800  | 1.68234500  |
| H | 6.37397100  | 2.36616800  | 1.39304800  |
| H | 1.59139600  | 3.39466200  | 0.63091400  |
| H | 5.41678500  | 4.50906800  | 2.22751000  |
| C | 2.25135300  | 1.04116100  | -0.50342800 |
| H | 2.48692900  | -0.00345000 | -0.24372200 |
| O | 0.91606800  | 1.33309600  | -0.29049000 |
| C | 5.13142200  | 0.42568000  | 0.01051300  |
| H | 4.48852200  | -0.44936900 | -0.02696400 |
| C | 6.40984600  | 0.27645600  | -0.38397800 |
| H | 7.10902600  | 1.10667500  | -0.41219100 |
| N | 2.88681500  | 5.31388800  | 1.97081200  |
| O | 3.63783400  | 6.07658500  | 2.57852100  |
| O | 1.69265700  | 5.52991300  | 1.76307100  |
| C | 6.99680000  | -1.00594700 | -0.82903100 |
| O | 6.10566800  | -2.02745800 | -0.82638300 |
| O | 8.15914600  | -1.13392600 | -1.16261800 |
| C | 6.62827000  | -3.29736500 | -1.23949300 |
| H | 6.97473500  | -3.25334500 | -2.27600800 |
| H | 7.46454300  | -3.59643800 | -0.60171400 |
| H | 5.79907500  | -3.99860200 | -1.14046400 |
| H | -0.24322800 | 1.84216300  | -2.11888600 |
| H | -0.79490700 | 0.12375400  | -2.31046800 |

**5a**

|   |             |             |             |
|---|-------------|-------------|-------------|
| C | 0.65064700  | -1.65026100 | -0.14942000 |
| C | 1.47039900  | -0.50775600 | -0.12343900 |
| C | 0.84592400  | 0.76068500  | -0.04854900 |
| C | -0.54842100 | 0.86131900  | 0.00128800  |
| C | -1.31341000 | -0.29024000 | -0.01604300 |
| C | -0.73008500 | -1.55437000 | -0.08936300 |
| H | 1.10821000  | -2.62642100 | -0.24942200 |
| H | -1.01264000 | 1.83662500  | 0.06325800  |
| H | -1.35960300 | -2.43332900 | -0.11404300 |

---

|   |             |             |             |
|---|-------------|-------------|-------------|
| C | 1.62490300  | 2.02796700  | 0.02970000  |
| O | 1.11948600  | 3.12743600  | 0.01838800  |
| H | 2.72094400  | 1.92254700  | 0.11775900  |
| C | 2.93705400  | -0.65846300 | -0.20548800 |
| C | 3.62932000  | -1.66737500 | 0.33029300  |
| H | 3.48175600  | 0.10901700  | -0.74515300 |
| H | 4.70513900  | -1.72592900 | 0.21734900  |
| H | 3.15629600  | -2.45065400 | 0.91254100  |
| N | -2.78833300 | -0.18249500 | 0.04039700  |
| O | -3.43059800 | -1.22553300 | 0.01697800  |
| O | -3.27385800 | 0.93766900  | 0.10726700  |

**1a**

|   |             |             |             |
|---|-------------|-------------|-------------|
| C | 1.89082400  | -1.90714400 | 0.36393600  |
| C | 0.96558200  | -0.91546000 | -0.01223500 |
| C | 1.46310700  | 0.34663800  | -0.41461100 |
| C | 2.83970100  | 0.58691600  | -0.43731600 |
| C | 3.71322400  | -0.42184500 | -0.07161000 |
| C | 3.25637700  | -1.67526500 | 0.33117500  |
| H | 1.52810400  | -2.86340000 | 0.71919500  |
| H | 3.20723100  | 1.55518700  | -0.75005200 |
| H | 3.96660900  | -2.43673400 | 0.62279000  |
| C | 0.56474700  | 1.44989600  | -0.87245600 |
| O | 0.96206900  | 2.58503300  | -1.03424200 |
| H | -0.48561200 | 1.19286000  | -1.07134900 |
| C | -0.48007000 | -1.19346300 | 0.07535000  |
| C | -1.00952300 | -2.40592700 | -0.14807900 |
| H | -1.13343900 | -0.37185300 | 0.35164100  |
| H | -0.40317100 | -3.24510400 | -0.46958000 |
| N | 5.17067100  | -0.16551100 | -0.10235500 |
| O | 5.91153600  | -1.08053000 | 0.23675500  |
| O | 5.54569500  | 0.94134300  | -0.46283200 |
| C | -2.43872300 | -2.75640200 | -0.00373800 |
| O | -2.87237400 | -3.86335500 | -0.23695800 |
| O | -3.20893400 | -1.73430100 | 0.42659300  |

---

|   |             |             |             |
|---|-------------|-------------|-------------|
| C | -4.59963000 | -2.04564000 | 0.62625200  |
| H | -4.70966900 | -2.84839300 | 1.35644900  |
| H | -5.05247400 | -1.12862600 | 0.99685400  |
| H | -5.06218300 | -2.35274600 | -0.31298900 |
| C | -2.20874300 | 2.93259100  | 0.81824300  |
| H | -1.56083700 | 3.57710400  | 0.20882400  |
| H | -2.68986600 | 3.55459200  | 1.58816200  |
| C | -3.28900000 | 2.32057600  | -0.04519900 |
| H | -3.85555400 | 1.57972700  | 0.53709100  |
| H | -3.98210700 | 3.11773600  | -0.35496800 |
| O | -1.44126300 | 1.90839900  | 1.43676000  |
| O | -2.71081700 | 1.71010400  | -1.18676200 |
| C | -3.67317000 | 1.16270600  | -2.06966100 |
| H | -4.35480900 | 1.93810400  | -2.44537400 |
| H | -3.13142100 | 0.72955500  | -2.91063600 |
| H | -4.26317900 | 0.37682500  | -1.58028100 |
| C | -0.49138200 | 2.42392400  | 2.35742500  |
| H | -0.98675200 | 2.97621300  | 3.16735900  |
| H | 0.04055300  | 1.57292100  | 2.78329100  |
| H | 0.22666900  | 3.08845200  | 1.86068500  |

**1a+C8**

|   |             |             |             |
|---|-------------|-------------|-------------|
| C | -2.82520500 | -5.50936400 | 0.05095300  |
| C | -2.77935600 | -4.11047700 | -0.07496800 |
| C | -1.57481900 | -3.44711400 | 0.27967100  |
| C | -0.47467100 | -4.17569300 | 0.74849300  |
| C | -0.56806100 | -5.54925600 | 0.85279000  |
| C | -1.73270600 | -6.23193800 | 0.50471300  |
| H | -3.74428600 | -6.03291200 | -0.17898200 |
| H | 0.43982400  | -3.66614400 | 1.01923900  |
| H | -1.77135700 | -7.30798900 | 0.60830700  |
| C | -3.96728600 | -3.37030000 | -0.52821000 |
| H | -4.12759500 | -2.37487500 | -0.13197600 |
| C | -4.87633500 | -3.83591100 | -1.39539300 |
| H | -4.79153800 | -4.80930200 | -1.86460500 |

---

|   |             |             |             |
|---|-------------|-------------|-------------|
| N | 0.59805500  | -6.31713700 | 1.35276500  |
| O | 0.47488800  | -7.53110300 | 1.43207000  |
| O | 1.60063900  | -5.68610900 | 1.65150400  |
| C | -6.07828400 | -3.07410700 | -1.82092700 |
| O | -6.12134900 | -1.83269400 | -1.30377200 |
| O | -6.91931100 | -3.53440900 | -2.55749900 |
| C | -7.26299100 | -1.02638800 | -1.66778600 |
| H | -7.31526500 | -0.91626100 | -2.75119500 |
| H | -8.18103600 | -1.49054400 | -1.30609200 |
| H | -7.09896000 | -0.06482500 | -1.18829300 |
| C | 1.29369300  | 1.85449200  | 0.16876700  |
| N | -0.06177900 | 1.63182400  | 0.37067500  |
| H | -0.35471500 | 0.66445800  | 0.46469600  |
| N | 2.00682600  | 0.66335000  | 0.15736800  |
| H | 1.47771900  | -0.18992500 | 0.27955200  |
| O | 1.79306100  | 2.95385500  | 0.02180900  |
| C | -1.08545200 | 2.58329600  | 0.42471800  |
| C | -0.89027900 | 3.96162300  | 0.25624000  |
| C | -2.38252800 | 2.10767700  | 0.66451200  |
| C | -1.98486600 | 4.82037700  | 0.32540500  |
| H | 0.10403000  | 4.34343800  | 0.08448300  |
| C | -3.45891500 | 2.98354400  | 0.72577800  |
| H | -2.54567900 | 1.04838400  | 0.82243200  |
| C | -3.27648900 | 4.35330300  | 0.55351300  |
| H | -4.11182300 | 5.03644300  | 0.61156100  |
| C | 3.38436000  | 0.49154200  | -0.04403700 |
| C | 4.28911700  | 1.54964800  | -0.19647600 |
| C | 3.86094700  | -0.82627300 | -0.09014300 |
| C | 5.64008600  | 1.26914800  | -0.39233100 |
| H | 3.93488800  | 2.56777100  | -0.15971500 |
| C | 5.21190200  | -1.07993700 | -0.28775300 |
| H | 3.17187900  | -1.65506300 | 0.02364100  |
| C | 6.12078300  | -0.03528800 | -0.44191800 |
| H | 7.17177200  | -0.23414200 | -0.59652700 |
| C | -4.84163700 | 2.42469900  | 0.92742100  |

---

|   |             |             |             |
|---|-------------|-------------|-------------|
| C | -1.76161600 | 6.29459300  | 0.08844300  |
| C | 5.70401000  | -2.50431600 | -0.27640900 |
| C | 6.58906300  | 2.42179200  | -0.61194300 |
| F | -2.73170400 | 7.05085000  | 0.64760200  |
| F | -1.75479800 | 6.58546500  | -1.23607900 |
| F | -0.58354000 | 6.71888400  | 0.58746000  |
| F | -5.68961300 | 3.32080300  | 1.46506300  |
| F | -4.83973900 | 1.33574100  | 1.73432500  |
| F | -5.39562500 | 2.01968000  | -0.24921000 |
| F | 6.80814500  | -2.66703500 | -1.03463500 |
| F | 4.76957400  | -3.36768600 | -0.73714000 |
| F | 6.02485100  | -2.91204400 | 0.97562500  |
| F | 6.27986400  | 3.48832500  | 0.15463700  |
| F | 6.56404700  | 2.84590200  | -1.89983100 |
| F | 7.86862300  | 2.08741400  | -0.33719900 |
| C | -1.42263100 | -1.98950200 | 0.12711800  |
| O | -0.42368500 | -1.36568500 | 0.45101200  |
| H | -2.27329600 | -1.45152400 | -0.32016700 |

**Pd-TMM dipole**

|    |             |             |             |
|----|-------------|-------------|-------------|
| C  | -0.27589800 | 3.46452900  | -1.32009000 |
| C  | -1.30428100 | 2.51690300  | -1.75816800 |
| H  | -1.24281300 | 2.23672000  | -2.81283500 |
| H  | -2.32459800 | 2.65298200  | -1.40818800 |
| C  | 0.99435100  | 2.79012500  | -1.60334800 |
| H  | 1.17039000  | 2.52388800  | -2.64853300 |
| H  | 1.89086500  | 3.13579200  | -1.09071700 |
| C  | -0.42377900 | 4.54996700  | -0.48545400 |
| H  | 0.45712000  | 5.06803200  | -0.11568300 |
| Pd | -0.01357400 | 1.08003000  | -0.79420700 |
| P  | -1.83772500 | -0.39397600 | -0.08225900 |
| P  | 2.01851300  | 0.01815600  | -0.01724000 |
| C  | 2.04748700  | -0.38025000 | 1.79558500  |
| C  | 3.56523500  | 1.03142100  | -0.22945900 |
| C  | 2.49669500  | -1.54585200 | -0.89933200 |



---

|   |             |             |             |
|---|-------------|-------------|-------------|
| C | -2.35238100 | -1.55113800 | -1.44543600 |
| C | -3.39761200 | 0.52242000  | 0.33039300  |
| C | -1.65689700 | -1.53603000 | 1.37841200  |
| C | 1.29718800  | 0.45421200  | 2.63929100  |
| C | 1.30837300  | 0.26194100  | 4.02183100  |
| C | 2.05766700  | -0.77684100 | 4.57646600  |
| C | 2.79606100  | -1.62049100 | 3.74381600  |
| C | 2.79485700  | -1.42308600 | 2.36231600  |
| C | 4.21752100  | 1.64398200  | 0.84884400  |
| C | 5.34178800  | 2.44643700  | 0.63322000  |
| C | 5.82915400  | 2.64401200  | -0.65829800 |
| C | 5.18345500  | 2.03855200  | -1.73996100 |
| C | 4.05848900  | 1.24337300  | -1.52841200 |
| C | 1.53456900  | -2.20548700 | -1.67835300 |
| C | 1.85285900  | -3.38397400 | -2.35842200 |
| C | 3.14104500  | -3.91311200 | -2.27516500 |
| C | 4.11393700  | -3.25402800 | -1.51878800 |
| C | 3.79767000  | -2.07606600 | -0.84146000 |
| C | -2.92946000 | -2.80948700 | -1.20939300 |
| C | -3.31702000 | -3.62278900 | -2.27642600 |
| C | -3.13484700 | -3.19206100 | -3.59208700 |
| C | -2.56037600 | -1.94327300 | -3.83791600 |
| C | -2.16880100 | -1.13011200 | -2.77302200 |
| C | -3.29568100 | 1.81363000  | 0.86874300  |
| C | -4.44044900 | 2.54075600  | 1.20229300  |
| C | -5.70148100 | 1.97521200  | 1.00883200  |
| C | -5.81467000 | 0.68708300  | 0.47888200  |
| C | -4.67125500 | -0.03624700 | 0.13777200  |
| C | -2.38838900 | -1.34547700 | 2.56000400  |
| C | -2.20593800 | -2.19582900 | 3.65348400  |
| C | -1.29678100 | -3.25071500 | 3.58163400  |
| C | -0.56128000 | -3.44764600 | 2.41038500  |
| C | -0.73377600 | -2.59399500 | 1.32184600  |
| H | -4.77528000 | -1.02959000 | -0.28742700 |
| H | -6.79550800 | 0.24663500  | 0.31887600  |

---

|   |             |             |             |
|---|-------------|-------------|-------------|
| H | -6.59515100 | 2.54224300  | 1.25565700  |
| H | -4.33020900 | 3.55812600  | 1.56420300  |
| H | -2.32077100 | 2.27332700  | 0.99961300  |
| H | -3.07079200 | -3.15987400 | -0.19197600 |
| H | -3.76187500 | -4.59421400 | -2.07704300 |
| H | -3.43680500 | -3.82694200 | -4.42081100 |
| H | -2.41267500 | -1.60088900 | -4.85867700 |
| H | -1.71403100 | -0.16323700 | -2.96747300 |
| H | -3.10680300 | -0.53602500 | 2.63000600  |
| H | -2.78345100 | -2.03271400 | 4.55967900  |
| H | -1.15969200 | -3.91446400 | 4.43113100  |
| H | 0.15291500  | -4.26398400 | 2.34396200  |
| H | -0.14963800 | -2.76071800 | 0.42180400  |
| H | 4.57062600  | -1.55730000 | -0.28242300 |
| H | 5.12357000  | -3.65229800 | -1.46279200 |
| H | 3.39132000  | -4.82759300 | -2.80622700 |
| H | 1.09360800  | -3.87804600 | -2.95838600 |
| H | 0.53647100  | -1.78786500 | -1.76724800 |
| H | 3.85428700  | 1.49754900  | 1.86066700  |
| H | 5.83619300  | 2.91342700  | 1.48091400  |
| H | 6.70391300  | 3.26700400  | -0.82366500 |
| H | 5.55344400  | 2.18857500  | -2.75071400 |
| H | 3.56172400  | 0.78309300  | -2.37827000 |
| H | 3.36939300  | -2.09148600 | 1.72963000  |
| H | 3.37569900  | -2.43550200 | 4.16951000  |
| H | 2.06166300  | -0.93238300 | 5.65198400  |
| H | 0.72404500  | 0.91797300  | 4.66104100  |
| H | 0.69886800  | 1.25325200  | 2.20833700  |
| C | -1.67646200 | 4.99980400  | -0.01339300 |
| N | -2.70839400 | 5.37145300  | 0.39687100  |
